# Supplementary material
Source: Preprints.org preprint supplement (doi:10.20944/preprints202006.0329.v1)
Supplement: Supplementary file 1 [file supplementary]

## Sheet: CD-HIT summary
Representative sequence for the cluster	cluster size (how many seq, including representative seq)	overseas	from Australia	NSW	VIC	NT	QLD	WA
Cluster 0, No. sequences: 844, Representative: MT121215_China|2020-02-02, length:29945	844	142	702	211	457	6	19	9
Cluster 1, No. sequences: 158, Representative: hCoV-19/Australia/VIC683/2020|EPI_ISL_426978|2020-03-29, length:29906	158	0	158	0	151	7	0	0
Cluster 2, No. sequences: 104, Representative: hCoV-19/Australia/NT30/2020|EPI_ISL_430633|2020, length:29903	104	0	104	0	103	1	0	0
Cluster 3, No. sequences: 24, Representative: hCoV-19/Australia/NT06/2020|EPI_ISL_426633|2020-03-19, length:29903	24	0	24	0	21	3	0	0
Cluster 4, No. sequences: 22, Representative: hCoV-19/Australia/VIC895/2020|EPI_ISL_427147|2020-04-06, length:29906	22	0	22	0	21	1	0	0
Cluster 5, No. sequences: 18, Representative: hCoV-19/Australia/VIC1305/2020|EPI_ISL_430705|2020-04-10, length:29903	18	5	13	0	13	0	0	0
Cluster 6, No. sequences: 17, Representative: hCoV-19/Australia/VIC985/2020|EPI_ISL_430554|2020-03-30, length:29903	17	0	17	0	17	0	0	0
Cluster 7, No. sequences: 8, Representative: hCoV-19/Australia/VIC986/2020|EPI_ISL_430557|2020-03-30, length:29903	8	0	8	0	8	0	0	0
Cluster 8, No. sequences: 8, Representative: hCoV-19/Australia/VIC588/2020|EPI_ISL_426845|2020-03-21, length:29904	8	0	8	0	8	0	0	0
Cluster 9, No. sequences: 5, Representative: hCoV-19/Australia/VIC757/2020|EPI_ISL_427034|2020-03-31, length:29904	5	0	5	0	5	0	0	0
Cluster 10, No. sequences: 5, Representative: hCoV-19/Australia/VIC621/2020|EPI_ISL_426925|2020-03-28, length:29903	5	0	5	0	5	0	0	0
Cluster 11, No. sequences: 5, Representative: hCoV-19/Australia/VIC1047/2020|EPI_ISL_430561|2020-04-03, length:29903	5	0	5	0	5	0	0	0
Cluster 12, No. sequences: 5, Representative: hCoV-19/Australia/VIC673/2020|EPI_ISL_426969|2020-03-26, length:29903	5	0	5	0	5	0	0	0
Cluster 13, No. sequences: 5, Representative: hCoV-19/Australia/VIC936/2020|EPI_ISL_430470|2020-03-25, length:29903	5	0	5	0	5	0	0	0
Cluster 14, No. sequences: 4, Representative: hCoV-19/Australia/VIC101/2020|EPI_ISL_419813|2020-03-16, length:29893	4	0	4	0	4	0	0	0
Cluster 15, No. sequences: 4, Representative: hCoV-19/Australia/VIC472/2020|EPI_ISL_426764|2020-03-26, length:29904	4	0	4	0	4	0	0	0
Cluster 16, No. sequences: 4, Representative: hCoV-19/Australia/VIC388/2020|EPI_ISL_426695|2020-03-23, length:29891	4	0	4	0	4	0	0	0
Cluster 17, No. sequences: 4, Representative: hCoV-19/Australia/NT18/2020|EPI_ISL_426635|2020-03-23, length:29903	4	0	4	0	3	1	0	0
Cluster 18, No. sequences: 4, Representative: hCoV-19/Australia/VIC511/2020|EPI_ISL_426781|2020-03-23, length:29903	4	0	4	0	4	0	0	0
Cluster 19, No. sequences: 3, Representative: hCoV-19/England/CAMB-84ACA/2020|EPI_ISL_440487|2020-03-09, length:29782	3	3	0	0	0	0	0	0
Cluster 20, No. sequences: 3, Representative: hCoV-19/Australia/VIC332/2020|EPI_ISL_426641|2020-03-18, length:29901	3	0	3	0	3	0	0	0
Cluster 21, No. sequences: 3, Representative: hCoV-19/Australia/VIC442/2020|EPI_ISL_426739|2020-03-27, length:29903	3	0	3	0	3	0	0	0
Cluster 22, No. sequences: 3, Representative: hCoV-19/Australia/VIC1314/2020|EPI_ISL_430681|2020-04-11, length:29903	3	0	3	0	3	0	0	0
Cluster 23, No. sequences: 2, Representative: hCoV-19/Australia/VIC592/2020|EPI_ISL_426849|2020-03-23, length:29903	2	0	2	0	2	0	0	0
Cluster 24, No. sequences: 2, Representative: hCoV-19/Australia/VIC1003/2020|EPI_ISL_430487|2020-03-31, length:29903	2	0	2	0	2	0	0	0
Cluster 25, No. sequences: 2, Representative: hCoV-19/Australia/VIC691/2020|EPI_ISL_426983|2020-03-27, length:29902	2	0	2	0	2	0	0	0
Cluster 26, No. sequences: 2, Representative: hCoV-19/Australia/VIC956/2020|EPI_ISL_430529|2020-03-27, length:29903	2	0	2	0	2	0	0	0
Cluster 27, No. sequences: 2, Representative: hCoV-19/Australia/VIC559/2020|EPI_ISL_426820|2020-03-24, length:29903	2	0	2	0	2	0	0	0
Cluster 28, No. sequences: 2, Representative: hCoV-19/Australia/VIC1055/2020|EPI_ISL_430667|2020-04-03, length:29903	2	0	2	0	2	0	0	0
Cluster 29, No. sequences: 2, Representative: hCoV-19/Australia/VIC1321/2020|EPI_ISL_430704|2020-04-11, length:29903	2	0	2	0	2	0	0	0
Cluster 30, No. sequences: 2, Representative: hCoV-19/Australia/VIC790/2020|EPI_ISL_427065|2020-03-31, length:29903	2	0	2	0	2	0	0	0
Cluster 31, No. sequences: 2, Representative: hCoV-19/Australia/VIC693/2020|EPI_ISL_426985|2020-03-27, length:29903	2	0	2	0	2	0	0	0
Cluster 32, No. sequences: 2, Representative: hCoV-19/Australia/VIC578/2020|EPI_ISL_426836|2020-03-26, length:29903	2	0	2	0	2	0	0	0
Cluster 33, No. sequences: 2, Representative: hCoV-19/Australia/VIC633/2020|EPI_ISL_426875|2020-03-27, length:29903	2	0	2	0	2	0	0	0
Cluster 34, No. sequences: 2, Representative: hCoV-19/Australia/NT28/2020|EPI_ISL_430631|2020, length:29903	2	0	2	0	1	1	0	0
Cluster 35, No. sequences: 1, Representative: hCoV-19/Australia/VIC695/2020|EPI_ISL_426987|2020-03-28, length:29903	1	0	1	0	1	0	0	0
Cluster 36, No. sequences: 1, Representative: hCoV-19/Australia/VIC609/2020|EPI_ISL_426863|2020-03-27, length:29903	1	0	1	0	1	0	0	0
Cluster 37, No. sequences: 1, Representative: hCoV-19/Australia/VIC-CBA5/2020|EPI_ISL_430065|2020-04-08, length:29875	1	0	1	0	1	0	0	0
Cluster 38, No. sequences: 1, Representative: hCoV-19/Australia/VIC624/2020|EPI_ISL_426928|2020-03-28, length:29903	1	0	1	0	1	0	0	0
Cluster 39, No. sequences: 1, Representative: hCoV-19/Australia/VIC711/2020|EPI_ISL_426998|2020-03-29, length:29903	1	0	1	0	1	0	0	0
Cluster 40, No. sequences: 1, Representative: hCoV-19/Australia/VIC1064/2020|EPI_ISL_430672|2020-04-04, length:29903	1	0	1	0	1	0	0	0
Cluster 41, No. sequences: 1, Representative: hCoV-19/Australia/VIC10/2020|EPI_ISL_416516|2020-03-16, length:29874	1	0	1	0	1	0	0	0
Cluster 42, No. sequences: 1, Representative: hCoV-19/Australia/VIC955/2020|EPI_ISL_430643|2020-03-26, length:29903	1	0	1	0	1	0	0	0
Cluster 43, No. sequences: 1, Representative: hCoV-19/Australia/NT04/2020|EPI_ISL_419833|2020-02-22, length:29865	1	0	1	0	0	1	0	0
Cluster 44, No. sequences: 1, Representative: hCoV-19/Australia/VIC643/2020|EPI_ISL_426939|2020-03-28, length:29903	1	0	1	0	1	0	0	0
Cluster 45, No. sequences: 1, Representative: hCoV-19/Australia/VIC545/2020|EPI_ISL_426808|2020-03-24, length:29903	1	0	1	0	1	0	0	0
Cluster 46, No. sequences: 1, Representative: hCoV-19/Australia/VIC1108/2020|EPI_ISL_430591|2020-04-07, length:29903	1	0	1	0	1	0	0	0
Cluster 47, No. sequences: 1, Representative: hCoV-19/Australia/VIC801/2020|EPI_ISL_427075|2020-04-01, length:29903	1	0	1	0	1	0	0	0
Cluster 48, No. sequences: 1, Representative: hCoV-19/Australia/VIC466/2020|EPI_ISL_426759|2020-03-27, length:29903	1	0	1	0	1	0	0	0
Cluster 49, No. sequences: 1, Representative: hCoV-19/Australia/VIC557/2020|EPI_ISL_426818|2020-03-25, length:29903	1	0	1	0	1	0	0	0
Cluster 50, No. sequences: 1, Representative: hCoV-19/Australia/VIC452/2020|EPI_ISL_426748|2020-03-25, length:29903	1	0	1	0	1	0	0	0
Cluster 51, No. sequences: 1, Representative: hCoV-19/Australia/VIC1174/2020|EPI_ISL_430623|2020-04-10, length:29903	1	0	1	0	1	0	0	0
Cluster 52, No. sequences: 1, Representative: hCoV-19/Australia/VIC928/2020|EPI_ISL_427156|2020-03-30, length:29903	1	0	1	0	1	0	0	0
Cluster 53, No. sequences: 1, Representative: hCoV-19/Australia/VIC671/2020|EPI_ISL_426967|2020-03-27, length:29765	1	0	1	0	1	0	0	0
Cluster 54, No. sequences: 1, Representative: hCoV-19/Australia/VIC1250/2020|EPI_ISL_436115|2020-04-10, length:29903	1	0	1	0	1	0	0	0
Cluster 55, No. sequences: 1, Representative: hCoV-19/Australia/VIC814/2020|EPI_ISL_427087|2020-04-02, length:29903	1	0	1	0	1	0	0	0
Cluster 56, No. sequences: 1, Representative: hCoV-19/Australia/VIC730/2020|EPI_ISL_427009|2020-03-30, length:29903	1	0	1	0	1	0	0	0
Cluster 57, No. sequences: 1, Representative: hCoV-19/Australia/VIC654/2020|EPI_ISL_426950|2020-03-28, length:29903	1	0	1	0	1	0	0	0
Cluster 58, No. sequences: 1, Representative: hCoV-19/Australia/VIC121/2020|EPI_ISL_419723|2020-03-18, length:29887	1	0	1	0	1	0	0	0
Cluster 59, No. sequences: 1, Representative: hCoV-19/Australia/VIC996/2020|EPI_ISL_430480|2020-03-31, length:29903	1	0	1	0	1	0	0	0
Cluster 60, No. sequences: 1, Representative: hCoV-19/Australia/VIC422/2020|EPI_ISL_426722|2020-03-25, length:29903	1	0	1	0	1	0	0	0
Cluster 61, No. sequences: 1, Representative: hCoV-19/Australia/VIC885/2020|EPI_ISL_427138|2020-04-06, length:29903	1	0	1	0	1	0	0	0
Cluster 62, No. sequences: 1, Representative: hCoV-19/Finland/13M3/2020|EPI_ISL_418389|2020-03-13, length:29811	1	1	0	0	0	0	0	0
Cluster 63, No. sequences: 1, Representative: hCoV-19/Australia/VIC809/2020|EPI_ISL_427083|2020-03-28, length:29903	1	0	1	0	1	0	0	0
Cluster 64, No. sequences: 1, Representative: hCoV-19/Australia/VIC692/2020|EPI_ISL_426984|2020-03-27, length:29901	1	0	1	0	1	0	0	0
Cluster 65, No. sequences: 1, Representative: hCoV-19/Australia/VIC864/2020|EPI_ISL_427121|2020-04-05, length:29903	1	0	1	0	1	0	0	0
Cluster 66, No. sequences: 1, Representative: hCoV-19/Australia/VIC93/2020|EPI_ISL_419815|2020-03-15, length:29873	1	0	1	0	1	0	0	0
Cluster 67, No. sequences: 1, Representative: hCoV-19/Australia/VIC1221/2020|EPI_ISL_430518|2020-04-01, length:29903	1	0	1	0	1	0	0	0
Cluster 68, No. sequences: 1, Representative: hCoV-19/Australia/VIC360/2020|EPI_ISL_426668|2020-03-22, length:29887	1	0	1	0	1	0	0	0
Cluster 69, No. sequences: 1, Representative: hCoV-19/Australia/VIC1061/2020|EPI_ISL_430549|2020-04-04, length:29903	1	0	1	0	1	0	0	0
Cluster 70, No. sequences: 1, Representative: hCoV-19/Australia/VIC1136/2020|EPI_ISL_430606|2020-04-08, length:29903	1	0	1	0	1	0	0	0
Cluster 71, No. sequences: 1, Representative: hCoV-19/Australia/VIC-CBA6/2020|EPI_ISL_430066|2020-04-08, length:29875	1	0	1	0	1	0	0	0
Cluster 72, No. sequences: 1, Representative: hCoV-19/Australia/VIC470/2020|EPI_ISL_426762|2020-03-26, length:29903	1	0	1	0	1	0	0	0
Cluster 73, No. sequences: 1, Representative: hCoV-19/Australia/VIC12/2020|EPI_ISL_416518|2020-03-16, length:29872	1	0	1	0	1	0	0	0
Cluster 74, No. sequences: 1, Representative: hCoV-19/Australia/VIC818/2020|EPI_ISL_427090|2020-04-03, length:29894	1	0	1	0	1	0	0	0
Cluster 75, No. sequences: 1, Representative: hCoV-19/Australia/VIC528/2020|EPI_ISL_426794|2020-03-24, length:29903	1	0	1	0	1	0	0	0
Cluster 76, No. sequences: 1, Representative: hCoV-19/Australia/VIC1317/2020|EPI_ISL_430691|2020-04-11, length:29903	1	0	1	0	1	0	0	0
Cluster 77, No. sequences: 1, Representative: hCoV-19/Australia/VIC1276/2020|EPI_ISL_430685|2020-04-04, length:29903	1	0	1	0	1	0	0	0
Cluster 78, No. sequences: 1, Representative: hCoV-19/Australia/VIC1014/2020|EPI_ISL_430555|2020-04-01, length:29903	1	0	1	0	1	0	0	0
Cluster 79, No. sequences: 1, Representative: hCoV-19/Netherlands/Dalen_1363624/2020|EPI_ISL_413568|2020-03-01, length:29783	1	1	0	0	0	0	0	0
Cluster 80, No. sequences: 1, Representative: hCoV-19/Australia/VIC1005/2020|EPI_ISL_430491|2020-03-31, length:29903	1	0	1	0	1	0	0	0
Cluster 81, No. sequences: 1, Representative: hCoV-19/Australia/VIC854/2020|EPI_ISL_427114|2020-04-04, length:29894	1	0	1	0	1	0	0	0
Cluster 82, No. sequences: 1, Representative: hCoV-19/Australia/VIC960/2020|EPI_ISL_430648|2020-03-27, length:29903	1	0	1	0	1	0	0	0
Cluster 83, No. sequences: 1, Representative: hCoV-19/Australia/VIC1186/2020|EPI_ISL_430629|2020-04-11, length:29903	1	0	1	0	1	0	0	0
Cluster 84, No. sequences: 1, Representative: hCoV-19/Australia/VIC1004/2020|EPI_ISL_430488|2020-03-31, length:29903	1	0	1	0	1	0	0	0
Cluster 85, No. sequences: 1, Representative: hCoV-19/Australia/VIC448/2020|EPI_ISL_426744|2020-03-24, length:29903	1	0	1	0	1	0	0	0
Cluster 86, No. sequences: 1, Representative: hCoV-19/Australia/VIC872/2020|EPI_ISL_427127|2020-04-05, length:29900	1	0	1	0	1	0	0	0
Cluster 87, No. sequences: 1, Representative: hCoV-19/Australia/VIC06/2020|EPI_ISL_416414|2020-03-06, length:29865	1	0	1	0	1	0	0	0
Cluster 88, No. sequences: 1, Representative: hCoV-19/Australia/VIC290/2020|EPI_ISL_419981|2020-03-22, length:29853	1	0	1	0	1	0	0	0
Cluster 89, No. sequences: 1, Representative: hCoV-19/Australia/VIC423/2020|EPI_ISL_426723|2020-03-25, length:29903	1	0	1	0	1	0	0	0
Cluster 90, No. sequences: 1, Representative: hCoV-19/Australia/VIC1303/2020|EPI_ISL_430694|2020-04-10, length:29903	1	0	1	0	1	0	0	0
Cluster 91, No. sequences: 1, Representative: hCoV-19/Australia/VIC107/2020|EPI_ISL_419720|2020-03-17, length:29865	1	0	1	0	1	0	0	0
Cluster 92, No. sequences: 1, Representative: hCoV-19/Australia/VIC363/2020|EPI_ISL_426671|2020-03-22, length:29901	1	0	1	0	1	0	0	0
Cluster 93, No. sequences: 1, Representative: hCoV-19/Brunei/1/2020|EPI_ISL_443187|2020-03-11, length:29859	1	1	0	0	0	0	0	0
Cluster 94, No. sequences: 1, Representative: hCoV-19/Australia/VIC967/2020|EPI_ISL_430660|2020-03-27, length:29903	1	0	1	0	1	0	0	0
Cluster 95, No. sequences: 1, Representative: hCoV-19/Australia/VIC453/2020|EPI_ISL_426749|2020-03-25, length:29903	1	0	1	0	1	0	0	0
Cluster 96, No. sequences: 1, Representative: hCoV-19/Australia/VIC684/2020|EPI_ISL_426979|2020-03-29, length:29903	1	0	1	0	1	0	0	0
Cluster 97, No. sequences: 1, Representative: hCoV-19/Australia/VIC789/2020|EPI_ISL_427064|2020-03-31, length:29903	1	0	1	0	1	0	0	0
Cluster 98, No. sequences: 1, Representative: hCoV-19/Australia/VIC776/2020|EPI_ISL_427051|2020-03-30, length:29903	1	0	1	0	1	0	0	0
Cluster 99, No. sequences: 1, Representative: hCoV-19/Australia/VIC601/2020|EPI_ISL_426857|2020-03-26, length:29902	1	0	1	0	1	0	0	0
Cluster 100, No. sequences: 1, Representative: hCoV-19/Australia/VIC352/2020|EPI_ISL_426660|2020-03-20, length:29846	1	0	1	0	1	0	0	0
Cluster 101, No. sequences: 1, Representative: hCoV-19/Australia/VIC992/2020|EPI_ISL_430475|2020-03-31, length:29906	1	0	1	0	1	0	0	0
Cluster 102, No. sequences: 1, Representative: hCoV-19/Australia/VIC1295/2020|EPI_ISL_430712|2020-04-09, length:29903	1	0	1	0	1	0	0	0
Cluster 103, No. sequences: 1, Representative: hCoV-19/Australia/VIC1176/2020|EPI_ISL_430630|2020-04-10, length:29903	1	0	1	0	1	0	0	0
Cluster 104, No. sequences: 1, Representative: hCoV-19/Australia/VIC1197/2020|EPI_ISL_430506|2020-03-31, length:29903	1	0	1	0	1	0	0	0
Cluster 105, No. sequences: 1, Representative: hCoV-19/Australia/VIC792/2020|EPI_ISL_427067|2020-03-31, length:29903	1	0	1	0	1	0	0	0
Cluster 106, No. sequences: 1, Representative: hCoV-19/Australia/VIC829/2020|EPI_ISL_427097|2020-04-04, length:29903	1	0	1	0	1	0	0	0
Cluster 107, No. sequences: 1, Representative: hCoV-19/Australia/VIC1163/2020|EPI_ISL_430617|2020-04-09, length:29906	1	0	1	0	1	0	0	0
Cluster 108, No. sequences: 1, Representative: hCoV-19/Australia/VIC1233/2020|EPI_ISL_430510|2020-04-02, length:29903	1	0	1	0	1	0	0	0
Cluster 109, No. sequences: 1, Representative: hCoV-19/Australia/VIC1219/2020|EPI_ISL_430516|2020-04-01, length:29903	1	0	1	0	1	0	0	0
Cluster 110, No. sequences: 1, Representative: hCoV-19/Australia/VIC1068/2020|EPI_ISL_430671|2020-04-04, length:29903	1	0	1	0	1	0	0	0
Cluster 111, No. sequences: 1, Representative: hCoV-19/Australia/VIC1335/2020|EPI_ISL_430692|2020-04-13, length:29903	1	0	1	0	1	0	0	0
Cluster 112, No. sequences: 1, Representative: hCoV-19/Australia/VIC987/2020|EPI_ISL_430558|2020-03-30, length:29882	1	0	1	0	1	0	0	0
Cluster 113, No. sequences: 1, Representative: hCoV-19/Australia/VIC1181/2020|EPI_ISL_430627|2020-04-11, length:29903	1	0	1	0	1	0	0	0
Cluster 114, No. sequences: 1, Representative: hCoV-19/Australia/VIC477/2020|EPI_ISL_426909|2020-03-28, length:29903	1	0	1	0	1	0	0	0
Cluster 115, No. sequences: 1, Representative: hCoV-19/Australia/VIC1257/2020|EPI_ISL_436121|2020-04-11, length:29903	1	0	1	0	1	0	0	0
Cluster 116, No. sequences: 1, Representative: hCoV-19/Australia/VIC1304/2020|EPI_ISL_430703|2020-04-10, length:29903	1	0	1	0	1	0	0	0
Cluster 117, No. sequences: 1, Representative: hCoV-19/Australia/VIC777/2020|EPI_ISL_427052|2020-03-30, length:29765	1	0	1	0	1	0	0	0
Cluster 118, No. sequences: 1, Representative: hCoV-19/Australia/VIC1142/2020|EPI_ISL_430613|2020-04-10, length:29903	1	0	1	0	1	0	0	0
Cluster 119, No. sequences: 1, Representative: hCoV-19/Australia/VIC721/2020|EPI_ISL_427004|2020-03-27, length:29904	1	0	1	0	1	0	0	0
Cluster 120, No. sequences: 1, Representative: hCoV-19/Australia/VIC641/2020|EPI_ISL_426937|2020-03-29, length:29903	1	0	1	0	1	0	0	0
Cluster 121, No. sequences: 1, Representative: hCoV-19/Australia/VIC604/2020|EPI_ISL_426859|2020-03-26, length:29903	1	0	1	0	1	0	0	0
counting	total	overseas	Australia	NSW	VIC	NT	QLD	WA
	1371	153	1218	211	958	21	19	9

## Sheet: cluster 0
Cluster 0, No. sequences: 844, Representative: MT121215_China|2020-02-02, length:29945	overseas	Australia	state
0. MT121215_China|2020-02-02, length: 29945, identity: 100%	overseas
1. hCoV-19/Australia/VIC615/2020|EPI_ISL_426870|2020-03-28, length: 29906, identity: +/99.62%		Australia	VIC
2. hCoV-19/Australia/VIC627/2020|EPI_ISL_426931|2020-03-29, length: 29906, identity: +/99.79%		Australia	VIC
3. hCoV-19/Australia/VIC680/2020|EPI_ISL_426975|2020-03-27, length: 29906, identity: +/99.75%		Australia	VIC
4. hCoV-19/Australia/VIC681/2020|EPI_ISL_426976|2020-03-27, length: 29906, identity: +/99.77%		Australia	VIC
5. hCoV-19/Australia/VIC751/2020|EPI_ISL_427028|2020-03-30, length: 29906, identity: +/99.59%		Australia	VIC
6. hCoV-19/Australia/VIC846/2020|EPI_ISL_427106|2020-04-04, length: 29906, identity: +/99.93%		Australia	VIC
7. hCoV-19/Australia/NT11/2020|EPI_ISL_426899|2020-03-27, length: 29903, identity: +/99.73%		Australia	NT
8. hCoV-19/Australia/NT17/2020|EPI_ISL_426904|2020-03-24, length: 29903, identity: +/99.65%		Australia	NT
9. hCoV-19/Australia/NT19/2020|EPI_ISL_426636|2020-03-25, length: 29903, identity: +/99.79%		Australia	NT
10. hCoV-19/Australia/VIC181/2020|EPI_ISL_419878|2020-03-19, length: 29903, identity: +/99.82%		Australia	VIC
11. hCoV-19/Australia/VIC222/2020|EPI_ISL_419917|2020-03-20, length: 29903, identity: +/99.93%		Australia	VIC
12. hCoV-19/Australia/VIC257/2020|EPI_ISL_419950|2020-03-21, length: 29903, identity: +/99.97%		Australia	VIC
13. hCoV-19/Australia/VIC260/2020|EPI_ISL_419953|2020-03-21, length: 29903, identity: +/99.92%		Australia	VIC
14. hCoV-19/Australia/VIC272/2020|EPI_ISL_419965|2020-03-22, length: 29903, identity: +/99.93%		Australia	VIC
15. hCoV-19/Australia/VIC273/2020|EPI_ISL_419966|2020-03-22, length: 29903, identity: +/99.96%		Australia	VIC
16. hCoV-19/Australia/VIC306/2020|EPI_ISL_419997|2020-03-23, length: 29903, identity: +/99.95%		Australia	VIC
17. hCoV-19/Australia/VIC335/2020|EPI_ISL_426644|2020-03-20, length: 29903, identity: +/99.79%		Australia	VIC
18. hCoV-19/Australia/VIC336/2020|EPI_ISL_426645|2020-03-20, length: 29903, identity: +/99.81%		Australia	VIC
19. hCoV-19/Australia/VIC337/2020|EPI_ISL_426646|2020-03-20, length: 29903, identity: +/99.86%		Australia	VIC
20. hCoV-19/Australia/VIC359/2020|EPI_ISL_426667|2020-03-22, length: 29903, identity: +/99.76%		Australia	VIC
21. hCoV-19/Australia/VIC378/2020|EPI_ISL_426685|2020-03-22, length: 29903, identity: +/99.89%		Australia	VIC
22. hCoV-19/Australia/VIC400/2020|EPI_ISL_426703|2020-03-24, length: 29903, identity: +/99.85%		Australia	VIC
23. hCoV-19/Australia/VIC407/2020|EPI_ISL_426709|2020-03-25, length: 29903, identity: +/99.78%		Australia	VIC
24. hCoV-19/Australia/VIC449/2020|EPI_ISL_426745|2020-03-24, length: 29903, identity: +/99.73%		Australia	VIC
25. hCoV-19/Australia/VIC458/2020|EPI_ISL_426752|2020-03-26, length: 29903, identity: +/99.73%		Australia	VIC
26. hCoV-19/Australia/VIC492/2020|EPI_ISL_426765|2020-03-23, length: 29903, identity: +/99.80%		Australia	VIC
27. hCoV-19/Australia/VIC497/2020|EPI_ISL_426770|2020-03-23, length: 29903, identity: +/99.84%		Australia	VIC
28. hCoV-19/Australia/VIC500/2020|EPI_ISL_426772|2020-03-24, length: 29903, identity: +/99.78%		Australia	VIC
29. hCoV-19/Australia/VIC509/2020|EPI_ISL_426779|2020-03-22, length: 29903, identity: +/99.67%		Australia	VIC
30. hCoV-19/Australia/VIC516/2020|EPI_ISL_426786|2020-03-23, length: 29903, identity: +/99.76%		Australia	VIC
31. hCoV-19/Australia/VIC527/2020|EPI_ISL_426793|2020-03-24, length: 29903, identity: +/99.78%		Australia	VIC
32. hCoV-19/Australia/VIC532/2020|EPI_ISL_426798|2020-03-23, length: 29903, identity: +/99.75%		Australia	VIC
33. hCoV-19/Australia/VIC538/2020|EPI_ISL_426804|2020-03-23, length: 29903, identity: +/99.79%		Australia	VIC
34. hCoV-19/Australia/VIC544/2020|EPI_ISL_426807|2020-03-23, length: 29903, identity: +/99.64%		Australia	VIC
35. hCoV-19/Australia/VIC547/2020|EPI_ISL_426810|2020-03-25, length: 29903, identity: +/99.68%		Australia	VIC
36. hCoV-19/Australia/VIC551/2020|EPI_ISL_426813|2020-03-25, length: 29903, identity: +/99.85%		Australia	VIC
37. hCoV-19/Australia/VIC558/2020|EPI_ISL_426819|2020-03-25, length: 29903, identity: +/99.75%		Australia	VIC
38. hCoV-19/Australia/VIC565/2020|EPI_ISL_426825|2020-03-25, length: 29903, identity: +/99.67%		Australia	VIC
39. hCoV-19/Australia/VIC567/2020|EPI_ISL_426827|2020-03-25, length: 29903, identity: +/99.64%		Australia	VIC
40. hCoV-19/Australia/VIC568/2020|EPI_ISL_426828|2020-03-25, length: 29903, identity: +/99.67%		Australia	VIC
41. hCoV-19/Australia/VIC571/2020|EPI_ISL_426831|2020-03-25, length: 29903, identity: +/99.78%		Australia	VIC
42. hCoV-19/Australia/VIC572/2020|EPI_ISL_426832|2020-03-25, length: 29903, identity: +/99.67%		Australia	VIC
43. hCoV-19/Australia/VIC584/2020|EPI_ISL_426841|2020-03-25, length: 29903, identity: +/99.68%		Australia	VIC
44. hCoV-19/Australia/VIC598/2020|EPI_ISL_426855|2020-03-25, length: 29903, identity: +/99.78%		Australia	VIC
45. hCoV-19/Australia/VIC605/2020|EPI_ISL_426860|2020-03-27, length: 29903, identity: +/99.67%		Australia	VIC
46. hCoV-19/Australia/VIC606/2020|EPI_ISL_426861|2020-03-27, length: 29903, identity: +/99.79%		Australia	VIC
47. hCoV-19/Australia/VIC610/2020|EPI_ISL_426864|2020-03-26, length: 29903, identity: +/99.69%		Australia	VIC
48. hCoV-19/Australia/VIC611/2020|EPI_ISL_426865|2020-03-27, length: 29903, identity: +/99.88%		Australia	VIC
49. hCoV-19/Australia/VIC617/2020|EPI_ISL_426872|2020-03-26, length: 29903, identity: +/99.79%		Australia	VIC
50. hCoV-19/Australia/VIC623/2020|EPI_ISL_426927|2020-03-28, length: 29903, identity: +/99.69%		Australia	VIC
51. hCoV-19/Australia/VIC628/2020|EPI_ISL_426932|2020-03-29, length: 29903, identity: +/99.70%		Australia	VIC
52. hCoV-19/Australia/VIC630/2020|EPI_ISL_426874|2020-03-26, length: 29903, identity: +/99.73%		Australia	VIC
53. hCoV-19/Australia/VIC636/2020|EPI_ISL_426877|2020-03-28, length: 29903, identity: +/99.79%		Australia	VIC
54. hCoV-19/Australia/VIC638/2020|EPI_ISL_426934|2020-03-29, length: 29903, identity: +/99.79%		Australia	VIC
55. hCoV-19/Australia/VIC639/2020|EPI_ISL_426935|2020-03-29, length: 29903, identity: +/99.91%		Australia	VIC
56. hCoV-19/Australia/VIC645/2020|EPI_ISL_426941|2020-03-28, length: 29903, identity: +/99.80%		Australia	VIC
57. hCoV-19/Australia/VIC646/2020|EPI_ISL_426942|2020-03-24, length: 29903, identity: +/99.77%		Australia	VIC
58. hCoV-19/Australia/VIC647/2020|EPI_ISL_426943|2020-03-28, length: 29903, identity: +/99.69%		Australia	VIC
59. hCoV-19/Australia/VIC652/2020|EPI_ISL_426948|2020-03-28, length: 29903, identity: +/99.81%		Australia	VIC
60. hCoV-19/Australia/VIC656/2020|EPI_ISL_426952|2020-03-28, length: 29903, identity: +/99.78%		Australia	VIC
61. hCoV-19/Australia/VIC662/2020|EPI_ISL_426958|2020-03-27, length: 29903, identity: +/99.79%		Australia	VIC
62. hCoV-19/Australia/VIC666/2020|EPI_ISL_426962|2020-03-27, length: 29903, identity: +/99.75%		Australia	VIC
63. hCoV-19/Australia/VIC667/2020|EPI_ISL_426963|2020-03-27, length: 29903, identity: +/99.81%		Australia	VIC
64. hCoV-19/Australia/VIC676/2020|EPI_ISL_426971|2020-03-27, length: 29903, identity: +/99.75%		Australia	VIC
65. hCoV-19/Australia/VIC677/2020|EPI_ISL_426972|2020-03-27, length: 29903, identity: +/99.82%		Australia	VIC
66. hCoV-19/Australia/VIC678/2020|EPI_ISL_426973|2020-03-27, length: 29903, identity: +/99.72%		Australia	VIC
67. hCoV-19/Australia/VIC685/2020|EPI_ISL_426980|2020-03-28, length: 29903, identity: +/99.79%		Australia	VIC
68. hCoV-19/Australia/VIC694/2020|EPI_ISL_426986|2020-03-28, length: 29903, identity: +/99.80%		Australia	VIC
69. hCoV-19/Australia/VIC697/2020|EPI_ISL_426989|2020-03-28, length: 29903, identity: +/99.68%		Australia	VIC
70. hCoV-19/Australia/VIC712/2020|EPI_ISL_426999|2020-03-29, length: 29903, identity: +/99.80%		Australia	VIC
71. hCoV-19/Australia/VIC731/2020|EPI_ISL_427010|2020-03-30, length: 29903, identity: +/99.76%		Australia	VIC
72. hCoV-19/Australia/VIC741/2020|EPI_ISL_427019|2020-03-30, length: 29903, identity: +/99.69%		Australia	VIC
73. hCoV-19/Australia/VIC752/2020|EPI_ISL_427029|2020-03-30, length: 29903, identity: +/99.67%		Australia	VIC
74. hCoV-19/Australia/VIC762/2020|EPI_ISL_427038|2020-03-29, length: 29903, identity: +/99.58%		Australia	VIC
75. hCoV-19/Australia/VIC768/2020|EPI_ISL_427045|2020-03-20, length: 29903, identity: +/99.53%		Australia	VIC
76. hCoV-19/Australia/VIC796/2020|EPI_ISL_427070|2020-03-31, length: 29903, identity: +/99.72%		Australia	VIC
77. hCoV-19/Australia/VIC806/2020|EPI_ISL_427080|2020-03-23, length: 29903, identity: +/99.61%		Australia	VIC
78. hCoV-19/Australia/VIC807/2020|EPI_ISL_427081|2020-03-24, length: 29903, identity: +/99.92%		Australia	VIC
79. hCoV-19/Australia/VIC808/2020|EPI_ISL_427082|2020-03-28, length: 29903, identity: +/99.79%		Australia	VIC
80. hCoV-19/Australia/VIC812/2020|EPI_ISL_427085|2020-04-02, length: 29903, identity: +/99.92%		Australia	VIC
81. hCoV-19/Australia/VIC820/2020|EPI_ISL_427092|2020-04-03, length: 29903, identity: +/99.94%		Australia	VIC
82. hCoV-19/Australia/VIC823/2020|EPI_ISL_427094|2020-04-03, length: 29903, identity: +/99.93%		Australia	VIC
83. hCoV-19/Australia/VIC824/2020|EPI_ISL_427095|2020-04-03, length: 29903, identity: +/99.84%		Australia	VIC
84. hCoV-19/Australia/VIC828/2020|EPI_ISL_427096|2020-04-03, length: 29903, identity: +/99.90%		Australia	VIC
85. hCoV-19/Australia/VIC836/2020|EPI_ISL_427100|2020-04-04, length: 29903, identity: +/99.87%		Australia	VIC
86. hCoV-19/Australia/VIC837/2020|EPI_ISL_427101|2020-04-04, length: 29903, identity: +/99.92%		Australia	VIC
87. hCoV-19/Australia/VIC842/2020|EPI_ISL_427102|2020-04-04, length: 29903, identity: +/99.87%		Australia	VIC
88. hCoV-19/Australia/VIC843/2020|EPI_ISL_427103|2020-04-04, length: 29903, identity: +/99.89%		Australia	VIC
89. hCoV-19/Australia/VIC845/2020|EPI_ISL_427105|2020-04-04, length: 29903, identity: +/99.80%		Australia	VIC
90. hCoV-19/Australia/VIC847/2020|EPI_ISL_427107|2020-04-04, length: 29903, identity: +/99.96%		Australia	VIC
91. hCoV-19/Australia/VIC848/2020|EPI_ISL_427108|2020-04-04, length: 29903, identity: +/99.89%		Australia	VIC
92. hCoV-19/Australia/VIC849/2020|EPI_ISL_427109|2020-04-04, length: 29903, identity: +/99.76%		Australia	VIC
93. hCoV-19/Australia/VIC851/2020|EPI_ISL_427111|2020-04-04, length: 29903, identity: +/99.74%		Australia	VIC
94. hCoV-19/Australia/VIC853/2020|EPI_ISL_427113|2020-04-04, length: 29903, identity: +/99.93%		Australia	VIC
95. hCoV-19/Australia/VIC856/2020|EPI_ISL_427115|2020-04-04, length: 29903, identity: +/99.90%		Australia	VIC
96. hCoV-19/Australia/VIC857/2020|EPI_ISL_427116|2020-04-05, length: 29903, identity: +/99.79%		Australia	VIC
97. hCoV-19/Australia/VIC858/2020|EPI_ISL_427117|2020-04-05, length: 29903, identity: +/99.80%		Australia	VIC
98. hCoV-19/Australia/VIC860/2020|EPI_ISL_427118|2020-04-05, length: 29903, identity: +/99.82%		Australia	VIC
99. hCoV-19/Australia/VIC862/2020|EPI_ISL_427119|2020-04-05, length: 29903, identity: +/99.90%		Australia	VIC
100. hCoV-19/Australia/VIC863/2020|EPI_ISL_427120|2020-04-05, length: 29903, identity: +/99.92%		Australia	VIC
101. hCoV-19/Australia/VIC867/2020|EPI_ISL_427122|2020-04-05, length: 29903, identity: +/99.94%		Australia	VIC
102. hCoV-19/Australia/VIC868/2020|EPI_ISL_427123|2020-04-05, length: 29903, identity: +/99.88%		Australia	VIC
103. hCoV-19/Australia/VIC869/2020|EPI_ISL_427124|2020-04-05, length: 29903, identity: +/99.91%		Australia	VIC
104. hCoV-19/Australia/VIC871/2020|EPI_ISL_427126|2020-04-05, length: 29903, identity: +/99.90%		Australia	VIC
105. hCoV-19/Australia/VIC874/2020|EPI_ISL_427129|2020-04-05, length: 29903, identity: +/99.93%		Australia	VIC
106. hCoV-19/Australia/VIC875/2020|EPI_ISL_427130|2020-04-05, length: 29903, identity: +/99.79%		Australia	VIC
107. hCoV-19/Australia/VIC876/2020|EPI_ISL_427131|2020-04-05, length: 29903, identity: +/99.83%		Australia	VIC
108. hCoV-19/Australia/VIC878/2020|EPI_ISL_427133|2020-04-06, length: 29903, identity: +/99.90%		Australia	VIC
109. hCoV-19/Australia/VIC879/2020|EPI_ISL_427134|2020-04-06, length: 29903, identity: +/99.92%		Australia	VIC
110. hCoV-19/Australia/VIC881/2020|EPI_ISL_427135|2020-04-06, length: 29903, identity: +/99.79%		Australia	VIC
111. hCoV-19/Australia/VIC886/2020|EPI_ISL_427139|2020-04-06, length: 29903, identity: +/99.79%		Australia	VIC
112. hCoV-19/Australia/VIC898/2020|EPI_ISL_427148|2020-04-08, length: 29903, identity: +/99.78%		Australia	VIC
113. hCoV-19/Australia/VIC912/2020|EPI_ISL_426881|2020-03-24, length: 29903, identity: +/99.78%		Australia	VIC
114. hCoV-19/Australia/VIC931/2020|EPI_ISL_427159|2020-03-30, length: 29903, identity: +/99.76%		Australia	VIC
115. hCoV-19/Australia/VIC932/2020|EPI_ISL_427160|2020-03-31, length: 29903, identity: +/99.82%		Australia	VIC
116. hCoV-19/Australia/VIC978/2020|EPI_ISL_430542|2020-03-29, length: 29903, identity: +/99.72%		Australia	VIC
117. hCoV-19/Australia/VIC982/2020|EPI_ISL_430543|2020-03-30, length: 29903, identity: +/99.74%		Australia	VIC
118. hCoV-19/Australia/VIC983/2020|EPI_ISL_430545|2020-03-30, length: 29903, identity: +/99.78%		Australia	VIC
119. hCoV-19/Australia/VIC990/2020|EPI_ISL_430556|2020-03-31, length: 29903, identity: +/99.78%		Australia	VIC
120. hCoV-19/Australia/VIC1046/2020|EPI_ISL_430550|2020-04-03, length: 29903, identity: +/99.79%		Australia	VIC
121. hCoV-19/Australia/VIC1159/2020|EPI_ISL_430604|2020-04-09, length: 29903, identity: +/99.75%		Australia	VIC
122. hCoV-19/Australia/VIC1178/2020|EPI_ISL_430674|2020-04-10, length: 29903, identity: +/99.71%		Australia	VIC
123. hCoV-19/Bangladesh/CHRF_nCOV19_0001/2020|EPI_ISL_437912|2020-04-18, length: 29903, identity: +/99.96%	overseas
124. hCoV-19/England/200991076/2020|EPI_ISL_414524|2020-03-01, length: 29903, identity: +/99.77%	overseas
125. hCoV-19/Iceland/2/2020|EPI_ISL_417552|2020-03-16, length: 29903, identity: +/99.62%	overseas
126. hCoV-19/Iceland/65/2020|EPI_ISL_417705|2020-03-07, length: 29903, identity: +/99.80%	overseas
127. hCoV-19/Iceland/514/2020|EPI_ISL_424536|2020-03-21, length: 29903, identity: +/99.74%	overseas
128. hCoV-19/India/GMC-TC469/2020|EPI_ISL_431117|2020-03-20, length: 29903, identity: +/99.93%	overseas
129. hCoV-19/Indonesia/JKT-EIJK01/2020|EPI_ISL_437189|2020-03-26, length: 29903, identity: +/99.98%	overseas
130. hCoV-19/Kazakhstan/NCB-5/2020|EPI_ISL_435048|2020-04-21, length: 29903, identity: +/99.97%	overseas
131. hCoV-19/Latvia/03/2020|EPI_ISL_421655|2020-03-25, length: 29903, identity: +/99.98%	overseas
132. hCoV-19/Qatar/QA20/2020|EPI_ISL_427416|2020-03-23, length: 29903, identity: +/99.97%	overseas
133. hCoV-19/Russia/Lipetsk-62704/2020|EPI_ISL_428865|2020-03-11, length: 29903, identity: +/99.96%	overseas
134. hCoV-19/Russia/Moscow-25I/2020|EPI_ISL_428851|2020-04-02, length: 29903, identity: +/99.97%	overseas
135. hCoV-19/Russia/Sakha-89702/2020|EPI_ISL_428907|2020-04-01, length: 29903, identity: +/99.97%	overseas
136. hCoV-19/Russia/StPetersburg-64304/2020|EPI_ISL_428868|2020-03-13, length: 29903, identity: +/99.97%	overseas
137. hCoV-19/Senegal/026/2020|EPI_ISL_418209|2020-03-03, length: 29903, identity: +/99.77%	overseas
138. hCoV-19/Slovakia/SK-BMC1/2020|EPI_ISL_417877|2020-03-06, length: 29903, identity: +/99.97%	overseas
139. hCoV-19/Sweden/20-05847/2020|EPI_ISL_434648|2020-03-16, length: 29903, identity: +/99.96%	overseas
140. hCoV-19/Taiwan/TSGH-01/2020|EPI_ISL_426629|2020-02-07, length: 29903, identity: +/99.97%	overseas
141. hCoV-19/Turkey/ERAGEM-001/2020|EPI_ISL_424366|2020-03-17, length: 29903, identity: +/99.74%	overseas
142. MT281577_China|2020-03-10, length: 29903, identity: +/99.97%	overseas
143. MT324062_SouthAfrica|2020-03-07, length: 29903, identity: +/99.97%	overseas
144. MT350282_Brazil|2020-03-18, length: 29903, identity: +/99.97%	overseas
145. NC_045512_reference_China/Wuhan|2019-12, length: 29903, identity: +/99.99%	overseas
146. hCoV-19/Australia/VIC29/2020|EPI_ISL_419748|2020-03-10, length: 29902, identity: +/99.94%		Australia	VIC
147. hCoV-19/Australia/VIC39/2020|EPI_ISL_419757|2020-03-11, length: 29902, identity: +/99.95%		Australia	VIC
148. hCoV-19/Australia/VIC40/2020|EPI_ISL_419758|2020-03-11, length: 29902, identity: +/99.92%		Australia	VIC
149. hCoV-19/Australia/VIC67/2020|EPI_ISL_419781|2020-03-13, length: 29902, identity: +/99.92%		Australia	VIC
150. hCoV-19/Australia/VIC105/2020|EPI_ISL_419819|2020-03-17, length: 29902, identity: +/99.93%		Australia	VIC
151. hCoV-19/Australia/VIC115/2020|EPI_ISL_419717|2020-03-19, length: 29902, identity: +/99.97%		Australia	VIC
152. hCoV-19/Australia/VIC141/2020|EPI_ISL_419838|2020-03-16, length: 29902, identity: +/99.92%		Australia	VIC
153. hCoV-19/Australia/VIC142/2020|EPI_ISL_419839|2020-03-16, length: 29902, identity: +/99.91%		Australia	VIC
154. hCoV-19/Australia/VIC153/2020|EPI_ISL_419850|2020-03-17, length: 29902, identity: +/99.88%		Australia	VIC
155. hCoV-19/Australia/VIC158/2020|EPI_ISL_419855|2020-03-18, length: 29902, identity: +/99.91%		Australia	VIC
156. hCoV-19/Australia/VIC180/2020|EPI_ISL_419877|2020-03-19, length: 29902, identity: +/99.94%		Australia	VIC
157. hCoV-19/Australia/VIC191/2020|EPI_ISL_419887|2020-03-19, length: 29902, identity: +/99.90%		Australia	VIC
158. hCoV-19/Australia/VIC214/2020|EPI_ISL_419909|2020-03-20, length: 29902, identity: +/99.93%		Australia	VIC
159. hCoV-19/Australia/VIC228/2020|EPI_ISL_419923|2020-03-20, length: 29902, identity: +/99.96%		Australia	VIC
160. hCoV-19/Australia/VIC279/2020|EPI_ISL_419972|2020-03-22, length: 29902, identity: +/99.93%		Australia	VIC
161. hCoV-19/Australia/VIC283/2020|EPI_ISL_419974|2020-03-22, length: 29902, identity: +/99.93%		Australia	VIC
162. hCoV-19/Australia/VIC289/2020|EPI_ISL_419980|2020-03-22, length: 29902, identity: +/99.96%		Australia	VIC
163. hCoV-19/Australia/VIC319/2020|EPI_ISL_420010|2020-03-24, length: 29902, identity: +/99.93%		Australia	VIC
164. hCoV-19/Australia/VIC326/2020|EPI_ISL_420017|2020-03-24, length: 29902, identity: +/99.91%		Australia	VIC
165. hCoV-19/Australia/VIC327/2020|EPI_ISL_426637|2020-03-17, length: 29902, identity: +/99.80%		Australia	VIC
166. hCoV-19/Australia/VIC357/2020|EPI_ISL_426665|2020-03-21, length: 29902, identity: +/99.91%		Australia	VIC
167. hCoV-19/Australia/VIC367/2020|EPI_ISL_426675|2020-03-22, length: 29902, identity: +/99.91%		Australia	VIC
168. hCoV-19/Australia/VIC403/2020|EPI_ISL_426706|2020-03-22, length: 29902, identity: +/99.81%		Australia	VIC
169. hCoV-19/Kuwait/KU09/2020|EPI_ISL_416541|2020-03-02, length: 29902, identity: +/99.96%	overseas
170. MT334541_USA|2020-03-11, length: 29902, identity: +/99.97%	overseas
171. hCoV-19/Australia/VIC26/2020|EPI_ISL_419745|2020-03-10, length: 29901, identity: +/99.94%		Australia	VIC
172. hCoV-19/Australia/VIC86/2020|EPI_ISL_419796|2020-03-15, length: 29901, identity: +/99.91%		Australia	VIC
173. hCoV-19/Australia/VIC91/2020|EPI_ISL_419804|2020-03-15, length: 29901, identity: +/99.92%		Australia	VIC
174. hCoV-19/Australia/VIC130/2020|EPI_ISL_419823|2020-03-21, length: 29901, identity: +/99.96%		Australia	VIC
175. hCoV-19/Australia/VIC145/2020|EPI_ISL_419842|2020-03-17, length: 29901, identity: +/99.90%		Australia	VIC
176. hCoV-19/Australia/VIC178/2020|EPI_ISL_419875|2020-03-18, length: 29901, identity: +/99.92%		Australia	VIC
177. hCoV-19/Australia/VIC184/2020|EPI_ISL_419880|2020-03-19, length: 29901, identity: +/99.93%		Australia	VIC
178. hCoV-19/Australia/VIC194/2020|EPI_ISL_419890|2020-03-19, length: 29901, identity: +/99.92%		Australia	VIC
179. hCoV-19/Australia/VIC203/2020|EPI_ISL_419898|2020-03-19, length: 29901, identity: +/99.92%		Australia	VIC
180. hCoV-19/Australia/VIC217/2020|EPI_ISL_419912|2020-03-20, length: 29901, identity: +/99.94%		Australia	VIC
181. hCoV-19/Australia/VIC252/2020|EPI_ISL_419947|2020-03-21, length: 29901, identity: +/99.96%		Australia	VIC
182. hCoV-19/Australia/VIC254/2020|EPI_ISL_419949|2020-03-21, length: 29901, identity: +/99.97%		Australia	VIC
183. hCoV-19/Australia/VIC256/2020|EPI_ISL_420036|2020-03-21, length: 29901, identity: +/99.96%		Australia	VIC
184. hCoV-19/Australia/VIC258/2020|EPI_ISL_419951|2020-03-21, length: 29901, identity: +/99.92%		Australia	VIC
185. hCoV-19/Australia/VIC274/2020|EPI_ISL_419967|2020-03-22, length: 29901, identity: +/99.91%		Australia	VIC
186. hCoV-19/Australia/VIC277/2020|EPI_ISL_419970|2020-03-22, length: 29901, identity: +/99.93%		Australia	VIC
187. hCoV-19/Australia/VIC286/2020|EPI_ISL_419977|2020-03-22, length: 29901, identity: +/99.93%		Australia	VIC
188. hCoV-19/Australia/VIC287/2020|EPI_ISL_419978|2020-03-22, length: 29901, identity: +/99.93%		Australia	VIC
189. hCoV-19/Australia/VIC295/2020|EPI_ISL_419986|2020-03-23, length: 29901, identity: +/99.92%		Australia	VIC
190. hCoV-19/Australia/VIC299/2020|EPI_ISL_419990|2020-03-23, length: 29901, identity: +/99.94%		Australia	VIC
191. hCoV-19/Australia/VIC308/2020|EPI_ISL_419999|2020-03-23, length: 29901, identity: +/99.91%		Australia	VIC
192. hCoV-19/Australia/VIC318/2020|EPI_ISL_420009|2020-03-24, length: 29901, identity: +/99.93%		Australia	VIC
193. hCoV-19/Australia/VIC347/2020|EPI_ISL_426656|2020-03-20, length: 29901, identity: +/99.86%		Australia	VIC
194. hCoV-19/Australia/VIC355/2020|EPI_ISL_426663|2020-03-21, length: 29901, identity: +/99.79%		Australia	VIC
195. hCoV-19/Australia/VIC87/2020|EPI_ISL_419797|2020-03-15, length: 29900, identity: +/99.91%		Australia	VIC
196. hCoV-19/Australia/VIC110/2020|EPI_ISL_419716|2020-03-18, length: 29900, identity: +/99.96%		Australia	VIC
197. hCoV-19/Australia/VIC162/2020|EPI_ISL_419859|2020-03-18, length: 29900, identity: +/99.91%		Australia	VIC
198. hCoV-19/Australia/VIC163/2020|EPI_ISL_419860|2020-03-18, length: 29900, identity: +/99.92%		Australia	VIC
199. hCoV-19/Australia/VIC223/2020|EPI_ISL_419918|2020-03-20, length: 29900, identity: +/99.95%		Australia	VIC
200. hCoV-19/Australia/VIC238/2020|EPI_ISL_419933|2020-03-21, length: 29900, identity: +/99.92%		Australia	VIC
201. hCoV-19/Australia/VIC244/2020|EPI_ISL_419939|2020-03-21, length: 29900, identity: +/99.90%		Australia	VIC
202. hCoV-19/Australia/VIC307/2020|EPI_ISL_419998|2020-03-23, length: 29900, identity: +/99.96%		Australia	VIC
203. hCoV-19/Australia/VIC353/2020|EPI_ISL_426661|2020-03-21, length: 29900, identity: +/99.89%		Australia	VIC
204. hCoV-19/Australia/VIC395/2020|EPI_ISL_426698|2020-03-24, length: 29900, identity: +/99.78%		Australia	VIC
205. hCoV-19/Australia/VIC710/2020|EPI_ISL_426997|2020-03-29, length: 29900, identity: +/99.80%		Australia	VIC
206. hCoV-19/England/200641094/2020|EPI_ISL_414040|2020-02-05, length: 29900, identity: +/99.89%	overseas
207. hCoV-19/Australia/VIC03/2020|EPI_ISL_416411|2020-01-25, length: 29899, identity: +/99.95%		Australia	VIC
208. hCoV-19/Australia/VIC08/2020|EPI_ISL_416514|2020-03-15, length: 29899, identity: +/99.96%		Australia	VIC
209. hCoV-19/Australia/VIC21/2020|EPI_ISL_419740|2020-03-09, length: 29899, identity: +/99.94%		Australia	VIC
210. hCoV-19/Australia/VIC27/2020|EPI_ISL_419746|2020-03-10, length: 29899, identity: +/99.91%		Australia	VIC
211. hCoV-19/Australia/VIC41/2020|EPI_ISL_419760|2020-03-11, length: 29899, identity: +/99.94%		Australia	VIC
212. hCoV-19/Australia/VIC46/2020|EPI_ISL_419816|2020-03-11, length: 29899, identity: +/99.93%		Australia	VIC
213. hCoV-19/Australia/VIC60/2020|EPI_ISL_419772|2020-03-13, length: 29899, identity: +/99.91%		Australia	VIC
214. hCoV-19/Australia/VIC69/2020|EPI_ISL_419783|2020-03-13, length: 29899, identity: +/99.93%		Australia	VIC
215. hCoV-19/Australia/VIC88/2020|EPI_ISL_419798|2020-03-15, length: 29899, identity: +/99.93%		Australia	VIC
216. hCoV-19/Australia/VIC92/2020|EPI_ISL_419809|2020-03-15, length: 29899, identity: +/99.94%		Australia	VIC
217. hCoV-19/Australia/VIC99/2020|EPI_ISL_419811|2020-03-16, length: 29899, identity: +/99.92%		Australia	VIC
218. hCoV-19/Australia/VIC131/2020|EPI_ISL_419824|2020-03-21, length: 29899, identity: +/99.95%		Australia	VIC
219. hCoV-19/Australia/VIC134/2020|EPI_ISL_419827|2020-03-22, length: 29899, identity: +/99.96%		Australia	VIC
220. hCoV-19/Australia/VIC138/2020|EPI_ISL_419834|2020-02-23, length: 29899, identity: +/99.96%		Australia	VIC
221. hCoV-19/Australia/VIC143/2020|EPI_ISL_419840|2020-03-16, length: 29899, identity: +/99.90%		Australia	VIC
222. hCoV-19/Australia/VIC146/2020|EPI_ISL_419843|2020-03-17, length: 29899, identity: +/99.94%		Australia	VIC
223. hCoV-19/Australia/VIC157/2020|EPI_ISL_419854|2020-03-17, length: 29899, identity: +/99.88%		Australia	VIC
224. hCoV-19/Australia/VIC187/2020|EPI_ISL_419883|2020-03-19, length: 29899, identity: +/99.93%		Australia	VIC
225. hCoV-19/Australia/VIC196/2020|EPI_ISL_419892|2020-03-19, length: 29899, identity: +/99.93%		Australia	VIC
226. hCoV-19/Australia/VIC198/2020|EPI_ISL_419894|2020-03-19, length: 29899, identity: +/99.87%		Australia	VIC
227. hCoV-19/Australia/VIC207/2020|EPI_ISL_419902|2020-03-19, length: 29899, identity: +/99.96%		Australia	VIC
228. hCoV-19/Australia/VIC208/2020|EPI_ISL_419903|2020-03-20, length: 29899, identity: +/99.93%		Australia	VIC
229. hCoV-19/Australia/VIC211/2020|EPI_ISL_419906|2020-03-20, length: 29899, identity: +/99.90%		Australia	VIC
230. hCoV-19/Australia/VIC231/2020|EPI_ISL_419926|2020-03-21, length: 29899, identity: +/99.94%		Australia	VIC
231. hCoV-19/Australia/VIC233/2020|EPI_ISL_419928|2020-03-21, length: 29899, identity: +/99.91%		Australia	VIC
232. hCoV-19/Australia/VIC240/2020|EPI_ISL_419935|2020-03-21, length: 29899, identity: +/99.92%		Australia	VIC
233. hCoV-19/Australia/VIC245/2020|EPI_ISL_419940|2020-03-21, length: 29899, identity: +/99.92%		Australia	VIC
234. hCoV-19/Australia/VIC249/2020|EPI_ISL_419944|2020-03-21, length: 29899, identity: +/99.93%		Australia	VIC
235. hCoV-19/Australia/VIC251/2020|EPI_ISL_419946|2020-03-21, length: 29899, identity: +/99.97%		Australia	VIC
236. hCoV-19/Australia/VIC253/2020|EPI_ISL_419948|2020-03-21, length: 29899, identity: +/99.96%		Australia	VIC
237. hCoV-19/Australia/VIC259/2020|EPI_ISL_419952|2020-03-21, length: 29899, identity: +/99.91%		Australia	VIC
238. hCoV-19/Australia/VIC265/2020|EPI_ISL_419958|2020-03-22, length: 29899, identity: +/99.91%		Australia	VIC
239. hCoV-19/Australia/VIC278/2020|EPI_ISL_419971|2020-03-22, length: 29899, identity: +/99.93%		Australia	VIC
240. hCoV-19/Australia/VIC291/2020|EPI_ISL_419982|2020-03-23, length: 29899, identity: +/99.91%		Australia	VIC
241. hCoV-19/Australia/VIC292/2020|EPI_ISL_419983|2020-03-23, length: 29899, identity: +/99.93%		Australia	VIC
242. hCoV-19/Australia/VIC297/2020|EPI_ISL_419988|2020-03-23, length: 29899, identity: +/99.92%		Australia	VIC
243. hCoV-19/Australia/VIC302/2020|EPI_ISL_419993|2020-03-23, length: 29899, identity: +/99.96%		Australia	VIC
244. hCoV-19/Australia/VIC304/2020|EPI_ISL_419995|2020-03-23, length: 29899, identity: +/99.93%		Australia	VIC
245. hCoV-19/Australia/VIC317/2020|EPI_ISL_420008|2020-03-24, length: 29899, identity: +/99.93%		Australia	VIC
246. hCoV-19/Australia/VIC320/2020|EPI_ISL_420011|2020-03-24, length: 29899, identity: +/99.92%		Australia	VIC
247. hCoV-19/Australia/VIC322/2020|EPI_ISL_420013|2020-03-24, length: 29899, identity: +/99.92%		Australia	VIC
248. hCoV-19/Australia/VIC329/2020|EPI_ISL_426639|2020-03-17, length: 29899, identity: +/99.92%		Australia	VIC
249. hCoV-19/Australia/VIC333/2020|EPI_ISL_426642|2020-03-18, length: 29899, identity: +/99.80%		Australia	VIC
250. hCoV-19/Australia/VIC334/2020|EPI_ISL_426643|2020-03-19, length: 29899, identity: +/99.87%		Australia	VIC
251. hCoV-19/Australia/VIC350/2020|EPI_ISL_426658|2020-03-20, length: 29899, identity: +/99.80%		Australia	VIC
252. hCoV-19/Australia/VIC354/2020|EPI_ISL_426662|2020-03-21, length: 29899, identity: +/99.86%		Australia	VIC
253. hCoV-19/Australia/VIC364/2020|EPI_ISL_426672|2020-03-22, length: 29899, identity: +/99.79%		Australia	VIC
254. hCoV-19/Australia/VIC366/2020|EPI_ISL_426674|2020-03-22, length: 29899, identity: +/99.79%		Australia	VIC
255. hCoV-19/Australia/VIC373/2020|EPI_ISL_426680|2020-03-22, length: 29899, identity: +/99.81%		Australia	VIC
256. hCoV-19/Australia/VIC387/2020|EPI_ISL_426694|2020-03-23, length: 29899, identity: +/99.79%		Australia	VIC
257. hCoV-19/Australia/VIC398/2020|EPI_ISL_426701|2020-03-24, length: 29899, identity: +/99.90%		Australia	VIC
258. hCoV-19/Australia/VIC402/2020|EPI_ISL_426705|2020-03-24, length: 29899, identity: +/99.80%		Australia	VIC
259. MT019529_China|2019-12-23, length: 29899, identity: +/99.98%	overseas
260. hCoV-19/Australia/VIC18/2020|EPI_ISL_419737|2020-03-07, length: 29898, identity: +/99.92%		Australia	VIC
261. hCoV-19/Australia/VIC140/2020|EPI_ISL_419837|2020-03-16, length: 29898, identity: +/99.92%		Australia	VIC
262. hCoV-19/Australia/VIC219/2020|EPI_ISL_419914|2020-03-20, length: 29898, identity: +/99.91%		Australia	VIC
263. hCoV-19/Australia/VIC229/2020|EPI_ISL_419924|2020-03-21, length: 29898, identity: +/99.93%		Australia	VIC
264. hCoV-19/Australia/VIC284/2020|EPI_ISL_419975|2020-03-22, length: 29898, identity: +/99.97%		Australia	VIC
265. hCoV-19/Australia/VIC293/2020|EPI_ISL_419984|2020-03-23, length: 29898, identity: +/99.94%		Australia	VIC
266. hCoV-19/Australia/VIC294/2020|EPI_ISL_419985|2020-03-23, length: 29898, identity: +/99.97%		Australia	VIC
267. hCoV-19/Australia/VIC321/2020|EPI_ISL_420012|2020-03-24, length: 29898, identity: +/99.93%		Australia	VIC
268. hCoV-19/Australia/VIC176/2020|EPI_ISL_419873|2020-03-18, length: 29897, identity: +/99.89%		Australia	VIC
269. hCoV-19/Australia/VIC264/2020|EPI_ISL_419957|2020-03-22, length: 29897, identity: +/99.92%		Australia	VIC
270. hCoV-19/Australia/VIC94/2020|EPI_ISL_419805|2020-03-16, length: 29896, identity: +/99.90%		Australia	VIC
271. hCoV-19/Australia/VIC98/2020|EPI_ISL_419810|2020-03-16, length: 29896, identity: +/99.92%		Australia	VIC
272. hCoV-19/Australia/VIC160/2020|EPI_ISL_419857|2020-03-18, length: 29896, identity: +/99.93%		Australia	VIC
273. hCoV-19/Australia/VIC311/2020|EPI_ISL_420002|2020-03-23, length: 29896, identity: +/99.92%		Australia	VIC
274. hCoV-19/Australia/VIC376/2020|EPI_ISL_426683|2020-03-22, length: 29896, identity: +/99.84%		Australia	VIC
275. hCoV-19/Australia/VIC396/2020|EPI_ISL_426699|2020-03-24, length: 29896, identity: +/99.88%		Australia	VIC
276. hCoV-19/Australia/VIC05/2020|EPI_ISL_416413|2020-03-05, length: 29895, identity: +/99.76%		Australia	VIC
277. hCoV-19/Australia/VIC34/2020|EPI_ISL_419753|2020-03-10, length: 29895, identity: +/99.94%		Australia	VIC
278. hCoV-19/Australia/VIC89/2020|EPI_ISL_419800|2020-03-15, length: 29895, identity: +/99.93%		Australia	VIC
279. hCoV-19/Australia/VIC148/2020|EPI_ISL_419845|2020-03-17, length: 29895, identity: +/99.95%		Australia	VIC
280. hCoV-19/Australia/VIC155/2020|EPI_ISL_419852|2020-03-17, length: 29895, identity: +/99.90%		Australia	VIC
281. hCoV-19/Australia/VIC206/2020|EPI_ISL_419901|2020-03-19, length: 29895, identity: +/99.62%		Australia	VIC
282. hCoV-19/Australia/VIC226/2020|EPI_ISL_419921|2020-03-20, length: 29895, identity: +/99.93%		Australia	VIC
283. hCoV-19/Australia/VIC261/2020|EPI_ISL_419954|2020-03-21, length: 29895, identity: +/99.96%		Australia	VIC
284. hCoV-19/Australia/VIC310/2020|EPI_ISL_420001|2020-03-23, length: 29895, identity: +/99.97%		Australia	VIC
285. hCoV-19/Australia/VIC328/2020|EPI_ISL_426638|2020-03-17, length: 29895, identity: +/99.82%		Australia	VIC
286. hCoV-19/Australia/NT05/2020|EPI_ISL_419835|2020-02-24, length: 29894, identity: +/99.93%		Australia	NT
287. hCoV-19/Australia/VIC84/2020|EPI_ISL_419803|2020-03-14, length: 29894, identity: +/99.93%		Australia	VIC
288. hCoV-19/Australia/VIC127/2020|EPI_ISL_419729|2020-03-20, length: 29894, identity: +/99.91%		Australia	VIC
289. hCoV-19/Australia/VIC147/2020|EPI_ISL_419844|2020-03-17, length: 29894, identity: +/99.89%		Australia	VIC
290. hCoV-19/Australia/VIC192/2020|EPI_ISL_419888|2020-03-19, length: 29894, identity: +/99.94%		Australia	VIC
291. hCoV-19/Australia/VIC204/2020|EPI_ISL_419899|2020-03-19, length: 29894, identity: +/99.93%		Australia	VIC
292. hCoV-19/Australia/VIC375/2020|EPI_ISL_426682|2020-03-22, length: 29894, identity: +/99.90%		Australia	VIC
293. hCoV-19/Australia/VIC883/2020|EPI_ISL_427136|2020-04-06, length: 29894, identity: +/99.91%		Australia	VIC
294. hCoV-19/Norway/1955/2020|EPI_ISL_420146|2020-03-11, length: 29894, identity: +/99.98%	overseas
295. hCoV-19/Australia/VIC01/2020|EPI_ISL_406844|2020-01-25, length: 29893, identity: +/99.98%		Australia	VIC
296. hCoV-19/Australia/VIC04/2020|EPI_ISL_416412|2020-03-02, length: 29893, identity: +/99.96%		Australia	VIC
297. hCoV-19/Australia/VIC49/2020|EPI_ISL_419764|2020-03-12, length: 29893, identity: +/99.90%		Australia	VIC
298. hCoV-19/Australia/VIC112/2020|EPI_ISL_419821|2020-03-18, length: 29893, identity: +/99.92%		Australia	VIC
299. hCoV-19/Australia/VIC173/2020|EPI_ISL_419870|2020-03-18, length: 29893, identity: +/99.96%		Australia	VIC
300. hCoV-19/Australia/VIC186/2020|EPI_ISL_419882|2020-03-19, length: 29893, identity: +/99.91%		Australia	VIC
301. hCoV-19/Australia/VIC195/2020|EPI_ISL_419891|2020-03-19, length: 29893, identity: +/99.95%		Australia	VIC
302. hCoV-19/Australia/VIC243/2020|EPI_ISL_419938|2020-03-21, length: 29893, identity: +/99.94%		Australia	VIC
303. hCoV-19/Australia/VIC280/2020|EPI_ISL_419973|2020-03-22, length: 29893, identity: +/99.93%		Australia	VIC
304. MT007544_Australia/Victoria|2020-01-25, length: 29893, identity: +/99.98%		Australia	VIC
305. hCoV-19/Australia/VIC81/2020|EPI_ISL_419793|2020-03-14, length: 29892, identity: +/99.90%		Australia	VIC
306. hCoV-19/Australia/VIC113/2020|EPI_ISL_419822|2020-03-18, length: 29892, identity: +/99.92%		Australia	VIC
307. hCoV-19/Australia/VIC174/2020|EPI_ISL_419871|2020-03-18, length: 29892, identity: +/99.93%		Australia	VIC
308. hCoV-19/Malaysia/IMR_WC085/2020|EPI_ISL_430443|2020-01-28, length: 29892, identity: +/99.91%	overseas
309. hCoV-19/Australia/VIC28/2020|EPI_ISL_419747|2020-03-10, length: 29891, identity: +/99.95%		Australia	VIC
310. hCoV-19/Australia/VIC54/2020|EPI_ISL_419770|2020-03-12, length: 29891, identity: +/99.97%		Australia	VIC
311. hCoV-19/Australia/VIC73/2020|EPI_ISL_419785|2020-03-14, length: 29891, identity: +/99.90%		Australia	VIC
312. hCoV-19/Australia/VIC78/2020|EPI_ISL_419790|2020-03-14, length: 29891, identity: +/99.95%		Australia	VIC
313. hCoV-19/Australia/VIC95/2020|EPI_ISL_419806|2020-03-16, length: 29891, identity: +/99.80%		Australia	VIC
314. hCoV-19/Australia/VIC128/2020|EPI_ISL_419730|2020-03-20, length: 29891, identity: +/99.93%		Australia	VIC
315. hCoV-19/Australia/VIC132/2020|EPI_ISL_419825|2020-03-22, length: 29891, identity: +/99.95%		Australia	VIC
316. hCoV-19/Australia/VIC168/2020|EPI_ISL_419865|2020-03-18, length: 29891, identity: +/99.85%		Australia	VIC
317. hCoV-19/Australia/VIC172/2020|EPI_ISL_419869|2020-03-18, length: 29891, identity: +/99.93%		Australia	VIC
318. hCoV-19/Australia/VIC185/2020|EPI_ISL_419881|2020-03-19, length: 29891, identity: +/99.92%		Australia	VIC
319. hCoV-19/Australia/VIC241/2020|EPI_ISL_419936|2020-03-21, length: 29891, identity: +/99.95%		Australia	VIC
320. hCoV-19/Australia/VIC242/2020|EPI_ISL_419937|2020-03-21, length: 29891, identity: +/99.95%		Australia	VIC
321. hCoV-19/Australia/VIC276/2020|EPI_ISL_419969|2020-03-22, length: 29891, identity: +/99.89%		Australia	VIC
322. hCoV-19/Australia/VIC305/2020|EPI_ISL_419996|2020-03-23, length: 29891, identity: +/99.93%		Australia	VIC
323. hCoV-19/Australia/VIC309/2020|EPI_ISL_420000|2020-03-23, length: 29891, identity: +/99.96%		Australia	VIC
324. hCoV-19/Australia/VIC340/2020|EPI_ISL_426649|2020-03-20, length: 29891, identity: +/99.82%		Australia	VIC
325. hCoV-19/Fujian/13/2020|EPI_ISL_411066|2020-01-22, length: 29891, identity: +/99.99%	overseas
326. hCoV-19/Jiangxi/IVDC-JX-002/2020|EPI_ISL_408486|2020-01-11, length: 29891, identity: +/99.94%	overseas
327. MT192772_Vietnam|2020-01-22, length: 29891, identity: +/99.99%	overseas
328. hCoV-19/Australia/VIC83/2020|EPI_ISL_419799|2020-03-14, length: 29890, identity: +/99.95%		Australia	VIC
329. hCoV-19/Australia/VIC136/2020|EPI_ISL_419829|2020-03-22, length: 29890, identity: +/99.97%		Australia	VIC
330. hCoV-19/Australia/VIC179/2020|EPI_ISL_419876|2020-03-18, length: 29889, identity: +/99.95%		Australia	VIC
331. hCoV-19/Australia/VIC25/2020|EPI_ISL_419744|2020-03-10, length: 29888, identity: +/99.92%		Australia	VIC
332. MT258377_USA|2020-03-18, length: 29888, identity: +/99.97%	overseas
333. hCoV-19/Australia/VIC47/2020|EPI_ISL_419759|2020-03-12, length: 29887, identity: +/99.92%		Australia	VIC
334. hCoV-19/Australia/VIC82/2020|EPI_ISL_419794|2020-03-14, length: 29887, identity: +/99.92%		Australia	VIC
335. hCoV-19/Australia/VIC139/2020|EPI_ISL_419836|2020-03-15, length: 29887, identity: +/99.93%		Australia	VIC
336. hCoV-19/Australia/VIC152/2020|EPI_ISL_419849|2020-03-17, length: 29887, identity: +/99.93%		Australia	VIC
337. hCoV-19/Australia/VIC202/2020|EPI_ISL_419897|2020-03-19, length: 29887, identity: +/99.96%		Australia	VIC
338. hCoV-19/Australia/VIC210/2020|EPI_ISL_419905|2020-03-20, length: 29887, identity: +/99.81%		Australia	VIC
339. hCoV-19/Australia/VIC288/2020|EPI_ISL_419979|2020-03-22, length: 29887, identity: +/99.94%		Australia	VIC
340. hCoV-19/Australia/VIC404/2020|EPI_ISL_426707|2020-03-24, length: 29887, identity: +/99.83%		Australia	VIC
341. hCoV-19/Slovenia/MB0329/2020|EPI_ISL_426379|2020-03-29, length: 29887, identity: +/99.87%	overseas
342. hCoV-19/Australia/VIC79/2020|EPI_ISL_419791|2020-03-14, length: 29886, identity: +/99.96%		Australia	VIC
343. hCoV-19/Korea/KCDC2002/2020|EPI_ISL_425118|2020-01-30, length: 29886, identity: +/99.97%	overseas
344. hCoV-19/Sweden/01/2020|EPI_ISL_411951|2020-02-07, length: 29886, identity: +/99.97%	overseas
345. MT093571_Sweden|2020-02-07, length: 29886, identity: +/99.97%	overseas
346. hCoV-19/Australia/VIC36/2020|EPI_ISL_419765|2020-03-10, length: 29885, identity: +/99.97%		Australia	VIC
347. hCoV-19/Australia/VIC884/2020|EPI_ISL_427137|2020-04-06, length: 29885, identity: +/99.93%		Australia	VIC
348. hCoV-19/Australia/VIC20/2020|EPI_ISL_419741|2020-03-08, length: 29884, identity: +/99.94%		Australia	VIC
349. MT328034_Greece|2020-03-18, length: 29884, identity: +/99.96%	overseas
350. MT019533_China|2020-01-01, length: 29883, identity: +/99.99%	overseas
351. hCoV-19/Uruguay/Mdeo-1/2020|EPI_ISL_444493|2020-03-13, length: 29882, identity: +/99.98%	overseas
352. MN988713_USA|2020-01-21, length: 29882, identity: +/99.97%	overseas
353. MN997409_USA|2020-01-22, length: 29882, identity: +/99.98%	overseas
354. MT039888_USA|2020-01-29, length: 29882, identity: +/99.98%	overseas
355. MT106054_USA|2020-02-11, length: 29882, identity: +/99.97%	overseas
356. MT159707_USA|2020-02-17, length: 29882, identity: +/99.99%	overseas
357. MT262911_USA|2020-03-13, length: 29882, identity: +/99.98%	overseas
358. MT304474_SouthKorea|2020-02-27, length: 29882, identity: +/99.98%	overseas
359. hCoV-19/Australia/VIC85/2020|EPI_ISL_419795|2020-03-15, length: 29881, identity: +/99.92%		Australia	VIC
360. hCoV-19/Canada/ON_PHL0052/2020|EPI_ISL_418332|2020-03-11, length: 29881, identity: +/99.97%	overseas
361. hCoV-19/Singapore/55/2020|EPI_ISL_428834|2020-04-08, length: 29881, identity: +/99.96%	overseas
362. hCoV-19/Australia/VIC361/2020|EPI_ISL_426669|2020-03-22, length: 29880, identity: +/99.81%		Australia	VIC
363. hCoV-19/Switzerland/1000477102/2020|EPI_ISL_413019|2020-02-26, length: 29879, identity: +/99.96%	overseas
364. hCoV-19/Australia/VIC42/2020|EPI_ISL_419761|2020-03-11, length: 29878, identity: +/99.94%		Australia	VIC
365. hCoV-19/Australia/VIC90/2020|EPI_ISL_419801|2020-03-15, length: 29878, identity: +/99.95%		Australia	VIC
366. hCoV-19/Australia/VIC323/2020|EPI_ISL_420014|2020-03-24, length: 29878, identity: +/99.92%		Australia	VIC
367. hCoV-19/France/IDF0386-islP3/2020|EPI_ISL_411220|2020-01-28, length: 29878, identity: +/99.99%	overseas
368. hCoV-19/Japan/TY-WK-012/2020|EPI_ISL_408665|2020-01-29, length: 29878, identity: +/99.98%	overseas
369. hCoV-19/Taiwan/2/2020|EPI_ISL_406031|2020-01-23, length: 29878, identity: +/99.98%	overseas
370. LC534418_Japan|2020-02-14, length: 29878, identity: +/99.98%	overseas
371. hCoV-19/Australia/VIC314/2020|EPI_ISL_420005|2020-03-24, length: 29877, identity: +/99.52%		Australia	VIC
372. MT126808_Brazil|2020-02-28, length: 29876, identity: +/99.98%	overseas
373. hCoV-19/Australia/VIC215/2020|EPI_ISL_419910|2020-03-20, length: 29875, identity: +/99.91%		Australia	VIC
374. hCoV-19/Australia/VIC285/2020|EPI_ISL_419976|2020-03-22, length: 29875, identity: +/99.94%		Australia	VIC
375. hCoV-19/Australia/VIC-CBA1/2020|EPI_ISL_420855|2020-03-23, length: 29875, identity: +/99.56%		Australia	VIC
376. hCoV-19/Australia/VIC-CBA2/2020|EPI_ISL_420876|2020-03-24, length: 29875, identity: +/99.71%		Australia	VIC
377. hCoV-19/Australia/VIC-CBA3/2020|EPI_ISL_420877|2020-03-28, length: 29875, identity: +/99.71%		Australia	VIC
378. hCoV-19/Australia/VIC-CBA4/2020|EPI_ISL_430064|2020-03-07, length: 29875, identity: +/99.72%		Australia	VIC
379. hCoV-19/Mexico/CDMX-INCMNSZ_04/2020|EPI_ISL_426364|2020-03-12, length: 29875, identity: +/99.97%	overseas
380. hCoV-19/Japan/Hu_Kng_19-437/2020|EPI_ISL_420890|2020-03-09, length: 29874, identity: +/99.98%	overseas
381. hCoV-19/Australia/VIC31/2020|EPI_ISL_419750|2020-03-10, length: 29873, identity: +/99.93%		Australia	VIC
382. hCoV-19/Australia/VIC32/2020|EPI_ISL_419751|2020-03-10, length: 29873, identity: +/99.90%		Australia	VIC
383. hCoV-19/Australia/VIC50/2020|EPI_ISL_419766|2020-03-12, length: 29873, identity: +/99.95%		Australia	VIC
384. hCoV-19/Australia/VIC58/2020|EPI_ISL_419784|2020-03-12, length: 29873, identity: +/99.96%		Australia	VIC
385. hCoV-19/Australia/VIC68/2020|EPI_ISL_419782|2020-03-13, length: 29873, identity: +/99.96%		Australia	VIC
386. hCoV-19/Australia/VIC77/2020|EPI_ISL_419789|2020-03-14, length: 29873, identity: +/99.91%		Australia	VIC
387. hCoV-19/Australia/VIC104/2020|EPI_ISL_419818|2020-03-17, length: 29873, identity: +/99.92%		Australia	VIC
388. hCoV-19/Australia/VIC106/2020|EPI_ISL_419820|2020-03-17, length: 29873, identity: +/99.93%		Australia	VIC
389. hCoV-19/Australia/VIC114/2020|EPI_ISL_419725|2020-03-18, length: 29873, identity: +/99.94%		Australia	VIC
390. hCoV-19/Australia/VIC165/2020|EPI_ISL_419862|2020-03-18, length: 29873, identity: +/99.91%		Australia	VIC
391. hCoV-19/Australia/VIC220/2020|EPI_ISL_419915|2020-03-20, length: 29873, identity: +/99.87%		Australia	VIC
392. hCoV-19/Australia/VIC246/2020|EPI_ISL_419941|2020-03-21, length: 29873, identity: +/99.91%		Australia	VIC
393. hCoV-19/Australia/VIC263/2020|EPI_ISL_419956|2020-03-21, length: 29873, identity: +/99.95%		Australia	VIC
394. hCoV-19/Australia/VIC268/2020|EPI_ISL_419961|2020-03-22, length: 29873, identity: +/99.91%		Australia	VIC
395. hCoV-19/Australia/VIC270/2020|EPI_ISL_419963|2020-03-22, length: 29873, identity: +/99.93%		Australia	VIC
396. hCoV-19/Australia/VIC381/2020|EPI_ISL_426688|2020-03-23, length: 29873, identity: +/99.84%		Australia	VIC
397. hCoV-19/Cambodia/0012/2020|EPI_ISL_411902|2020-01-27, length: 29873, identity: +/99.99%	overseas
398. hCoV-19/France/IDF0571/2020|EPI_ISL_411218|2020-02-02, length: 29873, identity: +/99.98%	overseas
399. hCoV-19/Australia/VIC129/2020|EPI_ISL_419732|2020-03-21, length: 29872, identity: +/99.95%		Australia	VIC
400. hCoV-19/Australia/VIC324/2020|EPI_ISL_420015|2020-03-24, length: 29872, identity: +/99.94%		Australia	VIC
401. MT291831_China|2020-01-24, length: 29872, identity: +/99.98%	overseas
402. hCoV-19/Australia/VIC30/2020|EPI_ISL_419749|2020-03-10, length: 29871, identity: +/99.93%		Australia	VIC
403. hCoV-19/Vietnam/CM99/2020|EPI_ISL_416429|2020-02-11, length: 29871, identity: +/99.97%	overseas
404. hCoV-19/Australia/VIC126/2020|EPI_ISL_419728|2020-03-20, length: 29870, identity: +/99.90%		Australia	VIC
405. hCoV-19/Hefei/2/2020|EPI_ISL_412026|2020-02-23, length: 29870, identity: +/99.99%	overseas
406. hCoV-19/Israel/ISR_IT0320/2020|EPI_ISL_419210|2020-03-01, length: 29870, identity: +/99.95%	overseas
407. MT066175_Taiwan|2020-01-31, length: 29870, identity: +/99.99%	overseas
408. MT066176_Taiwan|2020-02-05, length: 29870, identity: +/99.99%	overseas
409. hCoV-19/Australia/QLDID935/2020|EPI_ISL_436097|2020-03-25, length: 29869, identity: +/99.97%		Australia	QLD
410. hCoV-19/Australia/QLDID936/2020|EPI_ISL_436098|2020-03-23, length: 29869, identity: +/99.96%		Australia	QLD
411. hCoV-19/Philippines/PGC03/2020|EPI_ISL_434555|2020-03-26, length: 29869, identity: +/99.92%	overseas
412. hCoV-19/Australia/VIC13/2020|EPI_ISL_419733|2020-01-31, length: 29868, identity: +/99.85%		Australia	VIC
413. hCoV-19/Australia/VIC22/2020|EPI_ISL_419742|2020-03-09, length: 29868, identity: +/99.91%		Australia	VIC
414. hCoV-19/Australia/VIC57/2020|EPI_ISL_419779|2020-03-12, length: 29868, identity: +/99.96%		Australia	VIC
415. hCoV-19/Australia/VIC66/2020|EPI_ISL_419780|2020-03-13, length: 29868, identity: +/99.96%		Australia	VIC
416. hCoV-19/Australia/VIC103/2020|EPI_ISL_419814|2020-03-17, length: 29867, identity: +/99.91%		Australia	VIC
417. hCoV-19/Australia/VIC169/2020|EPI_ISL_419866|2020-03-18, length: 29867, identity: +/99.92%		Australia	VIC
418. hCoV-19/Australia/VIC224/2020|EPI_ISL_419919|2020-03-20, length: 29867, identity: +/99.93%		Australia	VIC
419. hCoV-19/Australia/VIC269/2020|EPI_ISL_419962|2020-03-22, length: 29867, identity: +/99.89%		Australia	VIC
420. hCoV-19/Australia/VIC312/2020|EPI_ISL_420003|2020-03-23, length: 29867, identity: +/99.96%		Australia	VIC
421. hCoV-19/Australia/VIC341/2020|EPI_ISL_426650|2020-03-20, length: 29867, identity: +/99.87%		Australia	VIC
422. hCoV-19/Australia/VIC48/2020|EPI_ISL_419762|2020-03-12, length: 29866, identity: +/99.93%		Australia	VIC
423. hCoV-19/Australia/VIC213/2020|EPI_ISL_419908|2020-03-20, length: 29866, identity: +/99.93%		Australia	VIC
424. hCoV-19/Australia/VIC218/2020|EPI_ISL_419913|2020-03-20, length: 29866, identity: +/99.89%		Australia	VIC
425. hCoV-19/Australia/VIC227/2020|EPI_ISL_419922|2020-03-20, length: 29866, identity: +/99.92%		Australia	VIC
426. hCoV-19/Australia/VIC237/2020|EPI_ISL_419932|2020-03-21, length: 29866, identity: +/99.90%		Australia	VIC
427. hCoV-19/Australia/VIC247/2020|EPI_ISL_419942|2020-03-21, length: 29866, identity: +/99.96%		Australia	VIC
428. hCoV-19/Australia/VIC271/2020|EPI_ISL_419964|2020-03-22, length: 29866, identity: +/99.91%		Australia	VIC
429. hCoV-19/Australia/VIC377/2020|EPI_ISL_426684|2020-03-22, length: 29866, identity: +/99.90%		Australia	VIC
430. hCoV-19/Norway/1538/2020|EPI_ISL_417486|2020-03-01, length: 29866, identity: +/99.97%	overseas
431. hCoV-19/Australia/NT01/2020|EPI_ISL_419831|2020-02-21, length: 29865, identity: +/99.95%		Australia	NT
432. hCoV-19/Australia/NT02/2020|EPI_ISL_419832|2020-02-21, length: 29865, identity: +/99.94%		Australia	NT
433. hCoV-19/Australia/QLD03/2020|EPI_ISL_410717|2020-02-05, length: 29865, identity: +/99.98%		Australia	QLD
434. hCoV-19/Australia/QLD04/2020|EPI_ISL_410718|2020-02-05, length: 29865, identity: +/99.98%		Australia	QLD
435. hCoV-19/Australia/QLDID921/2020|EPI_ISL_417033|2020-03-11, length: 29865, identity: +/99.98%		Australia	QLD
436. hCoV-19/Australia/VIC07/2020|EPI_ISL_416415|2020-02-08, length: 29865, identity: +/99.92%		Australia	VIC
437. hCoV-19/Australia/VIC17/2020|EPI_ISL_419736|2020-03-07, length: 29865, identity: +/99.92%		Australia	VIC
438. hCoV-19/Australia/VIC23/2020|EPI_ISL_419743|2020-03-09, length: 29865, identity: +/99.95%		Australia	VIC
439. hCoV-19/Australia/VIC33/2020|EPI_ISL_419752|2020-03-10, length: 29865, identity: +/99.92%		Australia	VIC
440. hCoV-19/Australia/VIC35/2020|EPI_ISL_419755|2020-03-10, length: 29865, identity: +/99.92%		Australia	VIC
441. hCoV-19/Australia/VIC37/2020|EPI_ISL_419754|2020-03-11, length: 29865, identity: +/99.71%		Australia	VIC
442. hCoV-19/Australia/VIC38/2020|EPI_ISL_419756|2020-03-11, length: 29865, identity: +/99.93%		Australia	VIC
443. hCoV-19/Australia/VIC43/2020|EPI_ISL_419763|2020-03-11, length: 29865, identity: +/99.92%		Australia	VIC
444. hCoV-19/Australia/VIC44/2020|EPI_ISL_419767|2020-03-11, length: 29865, identity: +/99.96%		Australia	VIC
445. hCoV-19/Australia/VIC45/2020|EPI_ISL_419802|2020-03-11, length: 29865, identity: +/99.93%		Australia	VIC
446. hCoV-19/Australia/VIC52/2020|EPI_ISL_419768|2020-03-12, length: 29865, identity: +/99.94%		Australia	VIC
447. hCoV-19/Australia/VIC53/2020|EPI_ISL_419769|2020-03-12, length: 29865, identity: +/99.92%		Australia	VIC
448. hCoV-19/Australia/VIC55/2020|EPI_ISL_419776|2020-03-12, length: 29865, identity: +/99.94%		Australia	VIC
449. hCoV-19/Australia/VIC56/2020|EPI_ISL_419777|2020-03-12, length: 29865, identity: +/99.90%		Australia	VIC
450. hCoV-19/Australia/VIC59/2020|EPI_ISL_419771|2020-03-13, length: 29865, identity: +/99.94%		Australia	VIC
451. hCoV-19/Australia/VIC62/2020|EPI_ISL_419774|2020-03-13, length: 29865, identity: +/99.96%		Australia	VIC
452. hCoV-19/Australia/VIC64/2020|EPI_ISL_419778|2020-03-13, length: 29865, identity: +/99.72%		Australia	VIC
453. hCoV-19/Australia/VIC70/2020|EPI_ISL_419786|2020-03-13, length: 29865, identity: +/99.97%		Australia	VIC
454. hCoV-19/Australia/VIC75/2020|EPI_ISL_419787|2020-03-14, length: 29865, identity: +/99.84%		Australia	VIC
455. hCoV-19/Australia/VIC80/2020|EPI_ISL_419792|2020-03-14, length: 29865, identity: +/99.94%		Australia	VIC
456. hCoV-19/Australia/VIC97/2020|EPI_ISL_419808|2020-03-16, length: 29865, identity: +/99.96%		Australia	VIC
457. hCoV-19/Australia/VIC100/2020|EPI_ISL_419812|2020-03-16, length: 29865, identity: +/99.91%		Australia	VIC
458. hCoV-19/Australia/VIC102/2020|EPI_ISL_419817|2020-03-16, length: 29865, identity: +/99.58%		Australia	VIC
459. hCoV-19/Australia/VIC108/2020|EPI_ISL_419714|2020-03-18, length: 29865, identity: +/99.92%		Australia	VIC
460. hCoV-19/Australia/VIC109/2020|EPI_ISL_419718|2020-03-18, length: 29865, identity: +/99.95%		Australia	VIC
461. hCoV-19/Australia/VIC111/2020|EPI_ISL_419715|2020-03-18, length: 29865, identity: +/99.93%		Australia	VIC
462. hCoV-19/Australia/VIC117/2020|EPI_ISL_419727|2020-03-19, length: 29865, identity: +/99.92%		Australia	VIC
463. hCoV-19/Australia/VIC120/2020|EPI_ISL_419722|2020-03-19, length: 29865, identity: +/99.69%		Australia	VIC
464. hCoV-19/Australia/VIC135/2020|EPI_ISL_419828|2020-03-22, length: 29865, identity: +/99.95%		Australia	VIC
465. hCoV-19/Australia/VIC144/2020|EPI_ISL_419841|2020-03-17, length: 29865, identity: +/99.93%		Australia	VIC
466. hCoV-19/Australia/VIC149/2020|EPI_ISL_419846|2020-03-17, length: 29865, identity: +/99.92%		Australia	VIC
467. hCoV-19/Australia/VIC150/2020|EPI_ISL_419847|2020-03-17, length: 29865, identity: +/99.91%		Australia	VIC
468. hCoV-19/Australia/VIC151/2020|EPI_ISL_419848|2020-03-17, length: 29865, identity: +/99.86%		Australia	VIC
469. hCoV-19/Australia/VIC154/2020|EPI_ISL_419851|2020-03-17, length: 29865, identity: +/99.93%		Australia	VIC
470. hCoV-19/Australia/VIC156/2020|EPI_ISL_419853|2020-03-17, length: 29865, identity: +/99.94%		Australia	VIC
471. hCoV-19/Australia/VIC167/2020|EPI_ISL_419864|2020-03-18, length: 29865, identity: +/99.92%		Australia	VIC
472. hCoV-19/Australia/VIC175/2020|EPI_ISL_419872|2020-03-18, length: 29865, identity: +/99.90%		Australia	VIC
473. hCoV-19/Australia/VIC183/2020|EPI_ISL_419879|2020-03-19, length: 29865, identity: +/99.57%		Australia	VIC
474. hCoV-19/Australia/VIC188/2020|EPI_ISL_419884|2020-03-19, length: 29865, identity: +/99.91%		Australia	VIC
475. hCoV-19/Australia/VIC189/2020|EPI_ISL_419885|2020-03-19, length: 29865, identity: +/99.97%		Australia	VIC
476. hCoV-19/Australia/VIC190/2020|EPI_ISL_419886|2020-03-19, length: 29865, identity: +/99.92%		Australia	VIC
477. hCoV-19/Australia/VIC197/2020|EPI_ISL_419893|2020-03-19, length: 29865, identity: +/99.93%		Australia	VIC
478. hCoV-19/Australia/VIC199/2020|EPI_ISL_419895|2020-03-19, length: 29865, identity: +/99.92%		Australia	VIC
479. hCoV-19/Australia/VIC201/2020|EPI_ISL_419896|2020-03-19, length: 29865, identity: +/99.93%		Australia	VIC
480. hCoV-19/Australia/VIC205/2020|EPI_ISL_419900|2020-03-19, length: 29865, identity: +/99.92%		Australia	VIC
481. hCoV-19/Australia/VIC209/2020|EPI_ISL_419904|2020-03-20, length: 29865, identity: +/99.86%		Australia	VIC
482. hCoV-19/Australia/VIC216/2020|EPI_ISL_419911|2020-03-20, length: 29865, identity: +/99.92%		Australia	VIC
483. hCoV-19/Australia/VIC225/2020|EPI_ISL_419920|2020-03-20, length: 29865, identity: +/99.96%		Australia	VIC
484. hCoV-19/Australia/VIC232/2020|EPI_ISL_419927|2020-03-21, length: 29865, identity: +/99.91%		Australia	VIC
485. hCoV-19/Australia/VIC234/2020|EPI_ISL_419929|2020-03-21, length: 29865, identity: +/99.91%		Australia	VIC
486. hCoV-19/Australia/VIC236/2020|EPI_ISL_419931|2020-03-21, length: 29865, identity: +/99.93%		Australia	VIC
487. hCoV-19/Australia/VIC239/2020|EPI_ISL_419934|2020-03-21, length: 29865, identity: +/99.92%		Australia	VIC
488. hCoV-19/Australia/VIC248/2020|EPI_ISL_419943|2020-03-21, length: 29865, identity: +/99.96%		Australia	VIC
489. hCoV-19/Australia/VIC250/2020|EPI_ISL_419945|2020-03-21, length: 29865, identity: +/99.97%		Australia	VIC
490. hCoV-19/Australia/VIC262/2020|EPI_ISL_419955|2020-03-21, length: 29865, identity: +/99.91%		Australia	VIC
491. hCoV-19/Australia/VIC266/2020|EPI_ISL_419959|2020-03-22, length: 29865, identity: +/99.97%		Australia	VIC
492. hCoV-19/Australia/VIC267/2020|EPI_ISL_419960|2020-03-22, length: 29865, identity: +/99.91%		Australia	VIC
493. hCoV-19/Australia/VIC275/2020|EPI_ISL_419968|2020-03-22, length: 29865, identity: +/99.94%		Australia	VIC
494. hCoV-19/Australia/VIC296/2020|EPI_ISL_419987|2020-03-23, length: 29865, identity: +/99.92%		Australia	VIC
495. hCoV-19/Australia/VIC298/2020|EPI_ISL_419989|2020-03-23, length: 29865, identity: +/99.91%		Australia	VIC
496. hCoV-19/Australia/VIC300/2020|EPI_ISL_419991|2020-03-23, length: 29865, identity: +/99.96%		Australia	VIC
497. hCoV-19/Australia/VIC301/2020|EPI_ISL_419992|2020-03-23, length: 29865, identity: +/99.89%		Australia	VIC
498. hCoV-19/Australia/VIC303/2020|EPI_ISL_419994|2020-03-23, length: 29865, identity: +/99.94%		Australia	VIC
499. hCoV-19/Australia/VIC313/2020|EPI_ISL_420004|2020-03-24, length: 29865, identity: +/99.84%		Australia	VIC
500. hCoV-19/Australia/VIC316/2020|EPI_ISL_420007|2020-03-24, length: 29865, identity: +/99.92%		Australia	VIC
501. hCoV-19/Australia/VIC325/2020|EPI_ISL_420016|2020-03-24, length: 29865, identity: +/99.93%		Australia	VIC
502. hCoV-19/Australia/VIC330/2020|EPI_ISL_426640|2020-03-18, length: 29865, identity: +/99.82%		Australia	VIC
503. hCoV-19/Australia/VIC345/2020|EPI_ISL_426654|2020-03-20, length: 29865, identity: +/99.79%		Australia	VIC
504. hCoV-19/Australia/VIC372/2020|EPI_ISL_426679|2020-03-22, length: 29865, identity: +/99.72%		Australia	VIC
505. hCoV-19/Australia/VIC380/2020|EPI_ISL_426687|2020-03-23, length: 29865, identity: +/99.73%		Australia	VIC
506. hCoV-19/Australia/VIC399/2020|EPI_ISL_426702|2020-03-24, length: 29865, identity: +/99.90%		Australia	VIC
507. hCoV-19/Australia/QLD02/2020|EPI_ISL_407896|2020-01-30, length: 29864, identity: +/99.97%		Australia	QLD
508. hCoV-19/Australia/QLD09/2020|EPI_ISL_414414|2020-02-29, length: 29864, identity: +/99.97%		Australia	QLD
509. hCoV-19/Australia/QLDID919/2020|EPI_ISL_417031|2020-03-11, length: 29864, identity: +/99.97%		Australia	QLD
510. hCoV-19/Australia/QLDID920/2020|EPI_ISL_417032|2020-03-11, length: 29864, identity: +/99.98%		Australia	QLD
511. hCoV-19/Australia/QLDID924/2020|EPI_ISL_418802|2020-03-18, length: 29864, identity: +/99.97%		Australia	QLD
512. hCoV-19/Australia/QLDID925/2020|EPI_ISL_418803|2020-03-18, length: 29864, identity: +/99.97%		Australia	QLD
513. hCoV-19/Australia/QLDID926/2020|EPI_ISL_418804|2020-03-18, length: 29864, identity: +/99.96%		Australia	QLD
514. hCoV-19/Australia/QLDID927/2020|EPI_ISL_418807|2020-03-19, length: 29864, identity: +/99.97%		Australia	QLD
515. hCoV-19/Australia/QLDID929/2020|EPI_ISL_420878|2020-03-24, length: 29864, identity: +/99.98%		Australia	QLD
516. hCoV-19/Australia/QLDID931/2020|EPI_ISL_420879|2020-03-25, length: 29864, identity: +/99.97%		Australia	QLD
517. hCoV-19/Australia/VIC159/2020|EPI_ISL_419856|2020-03-18, length: 29864, identity: +/99.88%		Australia	VIC
518. hCoV-19/Australia/VIC166/2020|EPI_ISL_419863|2020-03-18, length: 29864, identity: +/99.91%		Australia	VIC
519. hCoV-19/Australia/VIC170/2020|EPI_ISL_419867|2020-03-18, length: 29864, identity: +/99.92%		Australia	VIC
520. hCoV-19/Austria/CeMM0120/2020|EPI_ISL_437977|2020-03-15, length: 29864, identity: +/99.77%	overseas
521. hCoV-19/Taiwan/144/2020|EPI_ISL_421641|2020-03-19, length: 29864, identity: +/99.96%	overseas
522. hCoV-19/Algeria/G0860_2262/2020|EPI_ISL_420037|2020-03-02, length: 29862, identity: +/99.83%	overseas
523. hCoV-19/Australia/VIC96/2020|EPI_ISL_419807|2020-03-16, length: 29862, identity: +/99.95%		Australia	VIC
524. hCoV-19/Australia/VIC368/2020|EPI_ISL_426676|2020-03-22, length: 29862, identity: +/99.83%		Australia	VIC
525. hCoV-19/Belarus/ChVir2072/2020|EPI_ISL_419692|2020-03, length: 29862, identity: +/99.97%	overseas
526. hCoV-19/Australia/VIC221/2020|EPI_ISL_419916|2020-03-20, length: 29860, identity: +/99.93%		Australia	VIC
527. hCoV-19/Australia/VIC230/2020|EPI_ISL_419925|2020-03-21, length: 29859, identity: +/99.93%		Australia	VIC
528. hCoV-19/Austria/CeMM0003/2020|EPI_ISL_419656|2020-02-26, length: 29859, identity: +/99.82%	overseas
529. hCoV-19/France/BFC5019/2020|EPI_ISL_443264|2020-04-02, length: 29858, identity: +/99.85%	overseas
530. hCoV-19/Vietnam/OUCRU022/2020|EPI_ISL_435303|2020-03-07, length: 29857, identity: +/99.97%	overseas
531. hCoV-19/Australia/VIC123/2020|EPI_ISL_419731|2020-03-20, length: 29856, identity: +/99.85%		Australia	VIC
532. hCoV-19/Australia/VIC193/2020|EPI_ISL_419889|2020-03-19, length: 29856, identity: +/99.92%		Australia	VIC
533. hCoV-19/Australia/VIC342/2020|EPI_ISL_426651|2020-03-20, length: 29856, identity: +/99.94%		Australia	VIC
534. hCoV-19/Malaysia/MKAK-CL-2020-7554/2020|EPI_ISL_416907|2020-02-06, length: 29856, identity: +/99.99%	overseas
535. MT263074_Peru|2020-03-10, length: 29856, identity: +/99.96%	overseas
536. hCoV-19/Australia/VIC137/2020|EPI_ISL_419830|2020-03-22, length: 29855, identity: +/99.97%		Australia	VIC
537. hCoV-19/Australia/VIC382/2020|EPI_ISL_426689|2020-03-23, length: 29855, identity: +/99.92%		Australia	VIC
538. hCoV-19/India/1073/2020|EPI_ISL_421662|2020-03-10, length: 29855, identity: +/99.96%	overseas
539. hCoV-19/Luxembourg/LNS1995247/2020|EPI_ISL_429718|2020-03-19, length: 29855, identity: +/99.97%	overseas
540. MT012098_India|2020-01-27, length: 29854, identity: +/99.98%	overseas
541. hCoV-19/Australia/VIC383/2020|EPI_ISL_426690|2020-03-23, length: 29853, identity: +/99.95%		Australia	VIC
542. hCoV-19/Korea/KCDC2006/2020|EPI_ISL_426168|2020-02-02, length: 29853, identity: +/99.97%	overseas
543. hCoV-19/Switzerland/GE1402/2020|EPI_ISL_415700|2020-02-28, length: 29853, identity: +/99.97%	overseas
544. hCoV-19/Australia/VIC351/2020|EPI_ISL_426659|2020-03-20, length: 29852, identity: +/99.93%		Australia	VIC
545. hCoV-19/Australia/VIC385/2020|EPI_ISL_426692|2020-03-23, length: 29852, identity: +/99.95%		Australia	VIC
546. hCoV-19/Australia/VIC356/2020|EPI_ISL_426664|2020-03-21, length: 29851, identity: +/99.96%		Australia	VIC
547. hCoV-19/Australia/VIC362/2020|EPI_ISL_426670|2020-03-22, length: 29851, identity: +/99.92%		Australia	VIC
548. hCoV-19/Israel/ISR_JP0320/2020|EPI_ISL_419211|2020-02-23, length: 29851, identity: +/99.98%	overseas
549. MT050493_India|2020-01-31, length: 29851, identity: +/99.97%	overseas
550. hCoV-19/Chile/Talca-1/2020|EPI_ISL_414577|2020-03-02, length: 29850, identity: +/99.95%	overseas
551. hCoV-19/Australia/VIC171/2020|EPI_ISL_419868|2020-03-18, length: 29849, identity: +/99.92%		Australia	VIC
552. hCoV-19/Australia/VIC346/2020|EPI_ISL_426655|2020-03-20, length: 29849, identity: +/99.92%		Australia	VIC
553. hCoV-19/Thailand/61/2020|EPI_ISL_403962|2020-01-08, length: 29848, identity: +/99.99%	overseas
554. hCoV-19/Wuhan/HBCDC-HB-01/2019|EPI_ISL_402132|2019-12-30, length: 29848, identity: +/99.99%	overseas
555. hCoV-19/Australia/VIC348/2020|EPI_ISL_426657|2020-03-20, length: 29847, identity: +/99.83%		Australia	VIC
556. hCoV-19/Wuhan/HBCDC-HB-02/2020|EPI_ISL_412978|2020-01-17, length: 29846, identity: +/99.98%	overseas
557. hCoV-19/Singapore/1/2020|EPI_ISL_406973|2020-01-23, length: 29845, identity: +/99.99%	overseas
558. hCoV-19/Australia/QLDID928/2020|EPI_ISL_418808|2020-03-19, length: 29844, identity: +/99.98%		Australia	QLD
559. hCoV-19/Belgium/BC-03016/2020|EPI_ISL_415157|2020-03-01, length: 29843, identity: +/99.96%	overseas
560. hCoV-19/Denmark/SSI-01/2020|EPI_ISL_416142|2020-02-26, length: 29843, identity: +/99.97%	overseas
561. hCoV-19/Australia/NSWID930/2020|EPI_ISL_421636|2020-03-26, length: 29842, identity: +/99.96%		Australia	NSW
562. hCoV-19/Australia/QLD01/2020|EPI_ISL_407894|2020-01-28, length: 29842, identity: +/99.98%		Australia	QLD
563. hCoV-19/Australia/VIC338/2020|EPI_ISL_426647|2020-03-20, length: 29841, identity: +/99.83%		Australia	VIC
564. hCoV-19/Australia/VIC384/2020|EPI_ISL_426691|2020-03-23, length: 29841, identity: +/99.85%		Australia	VIC
565. hCoV-19/Italy/UniMI03/2020|EPI_ISL_417447|2020-02-24, length: 29841, identity: +/99.98%	overseas
566. hCoV-19/Foshan/20SF207/2020|EPI_ISL_406534|2020-01-22, length: 29839, identity: +/99.99%	overseas
567. hCoV-19/Belgium/KN-030756/2020|EPI_ISL_420450|2020-03-07, length: 29836, identity: +/99.95%	overseas
568. hCoV-19/Pakistan/Gilgit1/2020|EPI_ISL_417444|2020-03-04, length: 29836, identity: +/99.97%	overseas
569. hCoV-19/Thailand/TNIC-1889/2020|EPI_ISL_430837|2020-03-03, length: 29836, identity: +/99.97%	overseas
570. hCoV-19/Australia/QLDID923/2020|EPI_ISL_418801|2020-03-14, length: 29835, identity: +/99.98%		Australia	QLD
571. hCoV-19/Brunei/5/2020|EPI_ISL_435677|2020-03-21, length: 29835, identity: +/99.97%	overseas
572. MT188341_USA|2020-03-05, length: 29835, identity: +/99.92%	overseas
573. hCoV-19/Singapore/32/2020|EPI_ISL_420109|2020-03-11, length: 29834, identity: +/99.99%	overseas
574. hCoV-19/Australia/VIC369/2020|EPI_ISL_426677|2020-03-22, length: 29833, identity: +/99.85%		Australia	VIC
575. hCoV-19/Georgia/Tb-673/2020|EPI_ISL_416478|2020-03-14, length: 29833, identity: +/99.97%	overseas
576. MT327745_Turkey|2020-03-17, length: 29832, identity: +/99.97%	overseas
577. hCoV-19/Australia/QLDID922/2020|EPI_ISL_418799|2020-02-28, length: 29831, identity: +/99.98%		Australia	QLD
578. hCoV-19/Thailand/SI200893-NT/2020|EPI_ISL_437624|2020-02-01, length: 29829, identity: +/99.99%	overseas
579. MT192765_USA|2020-03-11, length: 29829, identity: +/99.98%	overseas
580. hCoV-19/Australia/VIC51/2020|EPI_ISL_419826|2020-03-12, length: 29827, identity: +/99.95%		Australia	VIC
581. hCoV-19/Greece/135/2020|EPI_ISL_434476|2020-03-10, length: 29825, identity: +/99.97%	overseas
582. hCoV-19/Australia/VIC394/2020|EPI_ISL_426697|2020-03-24, length: 29823, identity: +/99.93%		Australia	VIC
583. MT320891_Iran|2020-03-09, length: 29822, identity: +/99.98%	overseas
584. hCoV-19/Australia/VIC389/2020|EPI_ISL_426696|2020-03-23, length: 29821, identity: +/99.95%		Australia	VIC
585. hCoV-19/Australia/VIC344/2020|EPI_ISL_426653|2020-03-20, length: 29820, identity: +/99.94%		Australia	VIC
586. hCoV-19/Australia/VIC343/2020|EPI_ISL_426652|2020-03-20, length: 29819, identity: +/99.79%		Australia	VIC
587. hCoV-19/Greece/33_36910/2020|EPI_ISL_437893|2020-03-29, length: 29818, identity: +/99.97%	overseas
588. hCoV-19/Myanmar/NIH-4385/2020|EPI_ISL_434709|2020, length: 29818, identity: +/99.57%	overseas
589. hCoV-19/Australia/VIC339/2020|EPI_ISL_426648|2020-03-20, length: 29815, identity: +/99.95%		Australia	VIC
590. hCoV-19/Nepal/61/2020|EPI_ISL_410301|2020-01-13, length: 29811, identity: +/99.99%	overseas
591. MT072688_Nepal|2020-01-13, length: 29811, identity: +/99.99%	overseas
592. hCoV-19/Finland/FIN03032020C/2020|EPI_ISL_413604|2020-03-03, length: 29807, identity: +/99.86%	overseas
593. hCoV-19/Poland/PL_P5/2020|EPI_ISL_428928|2020-03-30, length: 29801, identity: +/99.97%	overseas
594. hCoV-19/Argentina/PAIS_A001/2020|EPI_ISL_430793|2020-03-01, length: 29798, identity: +/99.95%	overseas
595. hCoV-19/Iran/HGRC-2-2162/2020|EPI_ISL_437512|2020-03-26, length: 29793, identity: +/99.97%	overseas
596. hCoV-19/Chile/Santiago-1/2020|EPI_ISL_414579|2020-03-03, length: 29790, identity: +/99.97%	overseas
597. hCoV-19/Luxembourg/Lux1/2020|EPI_ISL_413593|2020-02-29, length: 29786, identity: +/99.98%	overseas
598. hCoV-19/Netherlands/Gelderland_1/2020|EPI_ISL_415461|2020-03-10, length: 29786, identity: +/99.98%	overseas
599. hCoV-19/Australia/NSW31/2020|EPI_ISL_417392|2020-03-10, length: 29785, identity: +/99.96%		Australia	NSW
600. hCoV-19/Spain/Madrid_H5_34/2020|EPI_ISL_417956|2020-03-11, length: 29784, identity: +/99.53%	overseas
601. hCoV-19/Australia/NSW01/2020|EPI_ISL_407893|2020-01-24, length: 29782, identity: +/99.99%		Australia	NSW
602. hCoV-19/Australia/NSW03/2020|EPI_ISL_408977|2020-01-25, length: 29782, identity: +/99.99%		Australia	NSW
603. hCoV-19/Australia/NSW04/2020|EPI_ISL_417030|2020-01-24, length: 29782, identity: +/99.98%		Australia	NSW
604. hCoV-19/Australia/NSW05/2020|EPI_ISL_412975|2020-02-28, length: 29782, identity: +/99.97%		Australia	NSW
605. hCoV-19/Australia/NSW06/2020|EPI_ISL_413213|2020-02-29, length: 29782, identity: +/99.97%		Australia	NSW
606. hCoV-19/Australia/NSW07/2020|EPI_ISL_413214|2020-02-29, length: 29782, identity: +/99.98%		Australia	NSW
607. hCoV-19/Australia/NSW15/2020|EPI_ISL_417383|2020-03-03, length: 29782, identity: +/99.97%		Australia	NSW
608. hCoV-19/Australia/NSW18/2020|EPI_ISL_417384|2020-03-05, length: 29782, identity: +/99.97%		Australia	NSW
609. hCoV-19/Australia/NSW19/2020|EPI_ISL_417385|2020-03-06, length: 29782, identity: +/99.97%		Australia	NSW
610. hCoV-19/Australia/NSW21/2020|EPI_ISL_417386|2020-03-04, length: 29782, identity: +/99.97%		Australia	NSW
611. hCoV-19/Australia/NSW24/2020|EPI_ISL_417387|2020-03-06, length: 29782, identity: +/99.97%		Australia	NSW
612. hCoV-19/Australia/NSW25/2020|EPI_ISL_417388|2020-03-05, length: 29782, identity: +/99.97%		Australia	NSW
613. hCoV-19/Australia/NSW26/2020|EPI_ISL_417389|2020-03-09, length: 29782, identity: +/99.96%		Australia	NSW
614. hCoV-19/Australia/NSW27/2020|EPI_ISL_417390|2020-03-08, length: 29782, identity: +/99.96%		Australia	NSW
615. hCoV-19/Australia/NSW28/2020|EPI_ISL_417391|2020-03-08, length: 29782, identity: +/99.96%		Australia	NSW
616. hCoV-19/Canada/SK_4/2020|EPI_ISL_418810|2020-03-09, length: 29782, identity: +/99.97%	overseas
617. hCoV-19/Colombia/Antioquia79256/2020|EPI_ISL_417924|2020-03-11, length: 29782, identity: +/99.97%	overseas
618. hCoV-19/England/CAMB-72704/2020|EPI_ISL_439882|2020-03-23, length: 29782, identity: +/99.96%	overseas
619. hCoV-19/Germany/BavPat1/2020|EPI_ISL_406862|2020-01-28, length: 29782, identity: +/99.98%	overseas
620. hCoV-19/Hungary/mbl1/2020|EPI_ISL_416426|2020-03-17, length: 29782, identity: +/99.97%	overseas
621. hCoV-19/Japan/UT-NCGM02/2020|EPI_ISL_418809|2020-02-01, length: 29782, identity: +/99.97%	overseas
622. hCoV-19/Scotland/CVR23/2020|EPI_ISL_425749|2020-03-12, length: 29782, identity: +/99.97%	overseas
623. hCoV-19/Scotland/CVR133/2020|EPI_ISL_425676|2020-03-16, length: 29782, identity: +/99.62%	overseas
624. hCoV-19/Spain/Madrid_H12_1301/2020|EPI_ISL_421171|2020-03-05, length: 29782, identity: +/99.97%	overseas
625. hCoV-19/USA/WI-11/2020|EPI_ISL_417505|2020-03-15, length: 29782, identity: +/99.97%	overseas
626. hCoV-19/Wales/PHW37/2020|EPI_ISL_415657|2020-03-12, length: 29782, identity: +/99.98%	overseas
627. MT198652_Spain|2020-03-05, length: 29782, identity: +/99.97%	overseas
628. MT233519_Spain|2020-02-27, length: 29782, identity: +/99.96%	overseas
629. MT256924_Colombia|2020-03-11, length: 29782, identity: +/99.97%	overseas
630. MT292572_Spain|2020-03-10, length: 29782, identity: +/99.98%	overseas
631. hCoV-19/Hangzhou/HZ48/2020|EPI_ISL_418441|2020-01-21, length: 29781, identity: +/99.99%	overseas
632. MT253696_China|2020-01-23, length: 29781, identity: +/99.99%	overseas
633. hCoV-19/Portugal/PT0007/2020|EPI_ISL_417992|2020-03-07, length: 29763, identity: +/99.97%	overseas
634. hCoV-19/Italy/INMI4/2020|EPI_ISL_417922|2020-02-28, length: 29760, identity: +/99.97%	overseas
635. hCoV-19/Germany/Baden-Wuerttemberg-1/2020|EPI_ISL_412912|2020-02-25, length: 29756, identity: +/99.97%	overseas
636. hCoV-19/Brazil/SC-766/2020|EPI_ISL_427305|2020-03-10, length: 29751, identity: +/99.96%	overseas
637. hCoV-19/Australia/WA01/2020|EPI_ISL_420531|2020-03-14, length: 29749, identity: +/99.97%		Australia	WA
638. hCoV-19/Australia/WA11/202|EPI_ISL_420456|2020-02-22, length: 29749, identity: +/99.97%		Australia	WA
639. hCoV-19/Australia/WA02/2020|EPI_ISL_420532|2020-03-13, length: 29742, identity: +/99.98%		Australia	WA
640. hCoV-19/Australia/WA03/2020|EPI_ISL_420533|2020-03-14, length: 29742, identity: +/99.97%		Australia	WA
641. hCoV-19/Australia/WA04/2020|EPI_ISL_420536|2020-03-15, length: 29742, identity: +/99.97%		Australia	WA
642. hCoV-19/Australia/WA06/2020|EPI_ISL_420534|2020-03-04, length: 29742, identity: +/99.97%		Australia	WA
643. hCoV-19/Australia/WA07/2020|EPI_ISL_420537|2020-03-13, length: 29742, identity: +/99.97%		Australia	WA
644. hCoV-19/Australia/WA09/2020|EPI_ISL_420538|2020-03-14, length: 29742, identity: +/99.97%		Australia	WA
645. hCoV-19/Australia/WA10/2020|EPI_ISL_420539|2020-03-14, length: 29742, identity: +/99.96%		Australia	WA
646. hCoV-19/Australia/NSW02/2020|EPI_ISL_408976|2020-01-22, length: 29741, identity: +/99.88%		Australia	NSW
647. hCoV-19/Egypt/NRC-01/2020|EPI_ISL_430820|2020-03-18, length: 29737, identity: +/99.77%	overseas
648. hCoV-19/Egypt/NRC-03/2020|EPI_ISL_430819|2020-03-18, length: 29709, identity: +/99.97%	overseas
649. hCoV-19/Portugal/PT0085/2020|EPI_ISL_421488|2020-03-22, length: 29703, identity: +/99.97%	overseas
650. hCoV-19/Australia/NSW65/2020|EPI_ISL_427645|2020-03-05, length: 29415, identity: +/99.95%		Australia	NSW
651. hCoV-19/Australia/NSW66/2020|EPI_ISL_427646|2020-03-04, length: 29415, identity: +/99.95%		Australia	NSW
652. hCoV-19/Australia/NSW22/2020|EPI_ISL_427649|2020-03-03, length: 29412, identity: +/99.96%		Australia	NSW
653. hCoV-19/Australia/NSW23/2020|EPI_ISL_427650|2020-03-04, length: 29412, identity: +/99.96%		Australia	NSW
654. hCoV-19/Australia/NSW29/2020|EPI_ISL_427651|2020-03-08, length: 29412, identity: +/99.97%		Australia	NSW
655. hCoV-19/Australia/NSW33/2020|EPI_ISL_427654|2020-03-06, length: 29412, identity: +/99.96%		Australia	NSW
656. hCoV-19/Australia/NSW34/2020|EPI_ISL_427655|2020-03-11, length: 29412, identity: +/99.96%		Australia	NSW
657. hCoV-19/Australia/NSW49/2020|EPI_ISL_427659|2020-03-10, length: 29412, identity: +/99.96%		Australia	NSW
658. hCoV-19/Australia/NSW51/2020|EPI_ISL_427660|2020-03-10, length: 29412, identity: +/99.97%		Australia	NSW
659. hCoV-19/Australia/NSW59/2020|EPI_ISL_427662|2020-03-17, length: 29412, identity: +/99.96%		Australia	NSW
660. hCoV-19/Australia/NSW60/2020|EPI_ISL_427663|2020-03-17, length: 29412, identity: +/99.92%		Australia	NSW
661. hCoV-19/Australia/NSW64/2020|EPI_ISL_427773|2020-03-25, length: 29412, identity: +/99.96%		Australia	NSW
662. hCoV-19/Australia/NSW67/2020|EPI_ISL_427733|2020-03-17, length: 29412, identity: +/99.96%		Australia	NSW
663. hCoV-19/Australia/NSW68/2020|EPI_ISL_427751|2020-03-25, length: 29412, identity: +/99.96%		Australia	NSW
664. hCoV-19/Australia/NSW69/2020|EPI_ISL_427705|2020-03-20, length: 29412, identity: +/99.96%		Australia	NSW
665. hCoV-19/Australia/NSW70/2020|EPI_ISL_427757|2020-03-20, length: 29412, identity: +/99.96%		Australia	NSW
666. hCoV-19/Australia/NSW71/2020|EPI_ISL_427759|2020-03-20, length: 29412, identity: +/99.96%		Australia	NSW
667. hCoV-19/Australia/NSW72/2020|EPI_ISL_427744|2020-03-21, length: 29412, identity: +/99.96%		Australia	NSW
668. hCoV-19/Australia/NSW73/2020|EPI_ISL_427750|2020-03-23, length: 29412, identity: +/99.96%		Australia	NSW
669. hCoV-19/Australia/NSW74/2020|EPI_ISL_427706|2020-03-19, length: 29412, identity: +/99.95%		Australia	NSW
670. hCoV-19/Australia/NSW75/2020|EPI_ISL_427703|2020-03-16, length: 29412, identity: +/99.97%		Australia	NSW
671. hCoV-19/Australia/NSW77/2020|EPI_ISL_427729|2020-03-17, length: 29412, identity: +/99.96%		Australia	NSW
672. hCoV-19/Australia/NSW78/2020|EPI_ISL_427770|2020-03-23, length: 29412, identity: +/99.96%		Australia	NSW
673. hCoV-19/Australia/NSW79/2020|EPI_ISL_427790|2020-03-23, length: 29412, identity: +/99.96%		Australia	NSW
674. hCoV-19/Australia/NSW80/2020|EPI_ISL_427690|2020-03-21, length: 29412, identity: +/99.96%		Australia	NSW
675. hCoV-19/Australia/NSW81/2020|EPI_ISL_427720|2020-03-18, length: 29412, identity: +/99.96%		Australia	NSW
676. hCoV-19/Australia/NSW82/2020|EPI_ISL_427805|2020-03-20, length: 29412, identity: +/99.96%		Australia	NSW
677. hCoV-19/Australia/NSW83/2020|EPI_ISL_427711|2020-03-21, length: 29412, identity: +/99.96%		Australia	NSW
678. hCoV-19/Australia/NSW84/2020|EPI_ISL_427723|2020-03-19, length: 29412, identity: +/99.95%		Australia	NSW
679. hCoV-19/Australia/NSW85/2020|EPI_ISL_427718|2020-03-16, length: 29412, identity: +/99.96%		Australia	NSW
680. hCoV-19/Australia/NSW86/2020|EPI_ISL_427725|2020-03-19, length: 29412, identity: +/99.95%		Australia	NSW
681. hCoV-19/Australia/NSW87/2020|EPI_ISL_427800|2020-03-24, length: 29412, identity: +/99.96%		Australia	NSW
682. hCoV-19/Australia/NSW88/2020|EPI_ISL_427702|2020-03-16, length: 29412, identity: +/99.96%		Australia	NSW
683. hCoV-19/Australia/NSW89/2020|EPI_ISL_427776|2020-03-23, length: 29412, identity: +/99.96%		Australia	NSW
684. hCoV-19/Australia/NSW90/2020|EPI_ISL_427680|2020-03-22, length: 29412, identity: +/99.92%		Australia	NSW
685. hCoV-19/Australia/NSW91/2020|EPI_ISL_427712|2020-03-20, length: 29412, identity: +/99.95%		Australia	NSW
686. hCoV-19/Australia/NSW92/2020|EPI_ISL_427675|2020-03-17, length: 29412, identity: +/99.96%		Australia	NSW
687. hCoV-19/Australia/NSW93/2020|EPI_ISL_427681|2020-03-19, length: 29412, identity: +/99.96%		Australia	NSW
688. hCoV-19/Australia/NSW94/2020|EPI_ISL_427716|2020-03-22, length: 29412, identity: +/99.96%		Australia	NSW
689. hCoV-19/Australia/NSW95/2020|EPI_ISL_427672|2020-03-23, length: 29412, identity: +/99.96%		Australia	NSW
690. hCoV-19/Australia/NSW96/2020|EPI_ISL_427678|2020-03-23, length: 29412, identity: +/99.96%		Australia	NSW
691. hCoV-19/Australia/NSW97/2020|EPI_ISL_427769|2020-03-23, length: 29412, identity: +/99.96%		Australia	NSW
692. hCoV-19/Australia/NSW98/2020|EPI_ISL_427774|2020-03-22, length: 29412, identity: +/99.96%		Australia	NSW
693. hCoV-19/Australia/NSW99/2020|EPI_ISL_427777|2020-03-21, length: 29412, identity: +/99.95%		Australia	NSW
694. hCoV-19/Australia/NSW100/2020|EPI_ISL_427722|2020-03-18, length: 29412, identity: +/99.95%		Australia	NSW
695. hCoV-19/Australia/NSW101/2020|EPI_ISL_427717|2020-03-17, length: 29412, identity: +/99.97%		Australia	NSW
696. hCoV-19/Australia/NSW102/2020|EPI_ISL_427656|2020-03-11, length: 29412, identity: +/99.97%		Australia	NSW
697. hCoV-19/Australia/NSW103/2020|EPI_ISL_427657|2020-03-10, length: 29412, identity: +/99.97%		Australia	NSW
698. hCoV-19/Australia/NSW104/2020|EPI_ISL_427677|2020-03-16, length: 29412, identity: +/99.97%		Australia	NSW
699. hCoV-19/Australia/NSW105/2020|EPI_ISL_427686|2020-03-23, length: 29412, identity: +/99.97%		Australia	NSW
700. hCoV-19/Australia/NSW106/2020|EPI_ISL_427748|2020-03-22, length: 29412, identity: +/99.97%		Australia	NSW
701. hCoV-19/Australia/NSW107/2020|EPI_ISL_427772|2020-03-22, length: 29412, identity: +/99.97%		Australia	NSW
702. hCoV-19/Australia/NSW108/2020|EPI_ISL_427804|2020-03-23, length: 29412, identity: +/99.97%		Australia	NSW
703. hCoV-19/Australia/NSW109/2020|EPI_ISL_427754|2020-03-24, length: 29412, identity: +/99.97%		Australia	NSW
704. hCoV-19/Australia/NSW110/2020|EPI_ISL_427741|2020-03-21, length: 29412, identity: +/99.85%		Australia	NSW
705. hCoV-19/Australia/NSW111/2020|EPI_ISL_427661|2020-03-16, length: 29412, identity: +/99.96%		Australia	NSW
706. hCoV-19/Australia/NSW112/2020|EPI_ISL_427666|2020-03-15, length: 29412, identity: +/99.96%		Australia	NSW
707. hCoV-19/Australia/NSW113/2020|EPI_ISL_427728|2020-03-17, length: 29412, identity: +/99.96%		Australia	NSW
708. hCoV-19/Australia/NSW114/2020|EPI_ISL_427724|2020-03-19, length: 29412, identity: +/99.96%		Australia	NSW
709. hCoV-19/Australia/NSW115/2020|EPI_ISL_427696|2020-03-21, length: 29412, identity: +/99.92%		Australia	NSW
710. hCoV-19/Australia/NSW116/2020|EPI_ISL_427698|2020-03-21, length: 29412, identity: +/99.96%		Australia	NSW
711. hCoV-19/Australia/NSW117/2020|EPI_ISL_427756|2020-03-25, length: 29412, identity: +/99.96%		Australia	NSW
712. hCoV-19/Australia/NSW118/2020|EPI_ISL_427693|2020-03-22, length: 29412, identity: +/99.96%		Australia	NSW
713. hCoV-19/Australia/NSW119/2020|EPI_ISL_427669|2020-03-22, length: 29412, identity: +/99.96%		Australia	NSW
714. hCoV-19/Australia/NSW120/2020|EPI_ISL_427679|2020-03-22, length: 29412, identity: +/99.96%		Australia	NSW
715. hCoV-19/Australia/NSW121/2020|EPI_ISL_427688|2020-03-22, length: 29412, identity: +/99.96%		Australia	NSW
716. hCoV-19/Australia/NSW122/2020|EPI_ISL_427778|2020-03-25, length: 29412, identity: +/99.96%		Australia	NSW
717. hCoV-19/Australia/NSW123/2020|EPI_ISL_427780|2020-03-23, length: 29412, identity: +/99.96%		Australia	NSW
718. hCoV-19/Australia/NSW124/2020|EPI_ISL_427782|2020-03-25, length: 29412, identity: +/99.96%		Australia	NSW
719. hCoV-19/Australia/NSW125/2020|EPI_ISL_427785|2020-03-23, length: 29412, identity: +/99.96%		Australia	NSW
720. hCoV-19/Australia/NSW126/2020|EPI_ISL_427794|2020-03-23, length: 29412, identity: +/99.96%		Australia	NSW
721. hCoV-19/Australia/NSW127/2020|EPI_ISL_427808|2020-03-24, length: 29412, identity: +/99.96%		Australia	NSW
722. hCoV-19/Australia/NSW128/2020|EPI_ISL_427689|2020-03-22, length: 29412, identity: +/99.96%		Australia	NSW
723. hCoV-19/Australia/NSW129/2020|EPI_ISL_427760|2020-03-24, length: 29412, identity: +/99.96%		Australia	NSW
724. hCoV-19/Australia/NSW130/2020|EPI_ISL_427768|2020-03-23, length: 29412, identity: +/99.96%		Australia	NSW
725. hCoV-19/Australia/NSW131/2020|EPI_ISL_427783|2020-03-25, length: 29412, identity: +/99.96%		Australia	NSW
726. hCoV-19/Australia/NSW132/2020|EPI_ISL_427787|2020-03-26, length: 29412, identity: +/99.96%		Australia	NSW
727. hCoV-19/Australia/NSW133/2020|EPI_ISL_427791|2020-03-24, length: 29412, identity: +/99.96%		Australia	NSW
728. hCoV-19/Australia/NSW134/2020|EPI_ISL_427742|2020-03-21, length: 29412, identity: +/99.74%		Australia	NSW
729. hCoV-19/Australia/NSW135/2020|EPI_ISL_427673|2020-03-22, length: 29412, identity: +/99.96%		Australia	NSW
730. hCoV-19/Australia/NSW136/2020|EPI_ISL_427692|2020-03-23, length: 29412, identity: +/99.96%		Australia	NSW
731. hCoV-19/Australia/NSW137/2020|EPI_ISL_427700|2020-03-23, length: 29412, identity: +/99.96%		Australia	NSW
732. hCoV-19/Australia/NSW138/2020|EPI_ISL_427761|2020-03-24, length: 29412, identity: +/99.96%		Australia	NSW
733. hCoV-19/Australia/NSW139/2020|EPI_ISL_427795|2020-03-24, length: 29412, identity: +/99.96%		Australia	NSW
734. hCoV-19/Australia/NSW140/2020|EPI_ISL_427799|2020-03-17, length: 29412, identity: +/99.96%		Australia	NSW
735. hCoV-19/Australia/NSW141/2020|EPI_ISL_427802|2020-03-18, length: 29412, identity: +/99.96%		Australia	NSW
736. hCoV-19/Australia/NSW142/2020|EPI_ISL_427749|2020-03-23, length: 29412, identity: +/99.96%		Australia	NSW
737. hCoV-19/Australia/NSW143/2020|EPI_ISL_427737|2020-03-20, length: 29412, identity: +/99.96%		Australia	NSW
738. hCoV-19/Australia/NSW144/2020|EPI_ISL_427738|2020-03-21, length: 29412, identity: +/99.96%		Australia	NSW
739. hCoV-19/Australia/NSW145/2020|EPI_ISL_427708|2020-03-21, length: 29412, identity: +/99.96%		Australia	NSW
740. hCoV-19/Australia/NSW146/2020|EPI_ISL_427682|2020-03-23, length: 29412, identity: +/99.95%		Australia	NSW
741. hCoV-19/Australia/NSW147/2020|EPI_ISL_427764|2020-03-23, length: 29412, identity: +/99.95%		Australia	NSW
742. hCoV-19/Australia/NSW148/2020|EPI_ISL_427683|2020-03-23, length: 29412, identity: +/99.94%		Australia	NSW
743. hCoV-19/Australia/NSW149/2020|EPI_ISL_427775|2020-03-25, length: 29412, identity: +/99.95%		Australia	NSW
744. hCoV-19/Australia/NSW150/2020|EPI_ISL_427796|2020-03-25, length: 29412, identity: +/99.96%		Australia	NSW
745. hCoV-19/Australia/NSW151/2020|EPI_ISL_427721|2020-03-19, length: 29412, identity: +/99.95%		Australia	NSW
746. hCoV-19/Australia/NSW152/2020|EPI_ISL_427648|2020-03-06, length: 29412, identity: +/99.96%		Australia	NSW
747. hCoV-19/Australia/NSW153/2020|EPI_ISL_427653|2020-03-08, length: 29412, identity: +/99.96%		Australia	NSW
748. hCoV-19/Australia/NSW154/2020|EPI_ISL_427652|2020-03-09, length: 29412, identity: +/99.96%		Australia	NSW
749. hCoV-19/Australia/NSW155/2020|EPI_ISL_427647|2020-03-06, length: 29412, identity: +/99.96%		Australia	NSW
750. hCoV-19/Australia/NSW156/2020|EPI_ISL_427719|2020-03-21, length: 29412, identity: +/99.94%		Australia	NSW
751. hCoV-19/Australia/NSW157/2020|EPI_ISL_427674|2020-03-22, length: 29412, identity: +/99.96%		Australia	NSW
752. hCoV-19/Australia/NSW158/2020|EPI_ISL_427735|2020-03-18, length: 29412, identity: +/99.96%		Australia	NSW
753. hCoV-19/Australia/NSW159/2020|EPI_ISL_427781|2020-03-22, length: 29412, identity: +/99.96%		Australia	NSW
754. hCoV-19/Australia/NSW160/2020|EPI_ISL_427784|2020-03-20, length: 29412, identity: +/99.96%		Australia	NSW
755. hCoV-19/Australia/NSW161/2020|EPI_ISL_427788|2020-03-20, length: 29412, identity: +/99.96%		Australia	NSW
756. hCoV-19/Australia/NSW162/2020|EPI_ISL_427758|2020-03-20, length: 29412, identity: +/99.95%		Australia	NSW
757. hCoV-19/Australia/NSW163/2020|EPI_ISL_427789|2020-03-20, length: 29412, identity: +/99.96%		Australia	NSW
758. hCoV-19/Australia/NSW164/2020|EPI_ISL_427715|2020-03-22, length: 29412, identity: +/99.95%		Australia	NSW
759. hCoV-19/Australia/NSW165/2020|EPI_ISL_427731|2020-03-17, length: 29412, identity: +/99.95%		Australia	NSW
760. hCoV-19/Australia/NSW166/2020|EPI_ISL_427771|2020-03-23, length: 29412, identity: +/99.96%		Australia	NSW
761. hCoV-19/Australia/NSW167/2020|EPI_ISL_427697|2020-03-22, length: 29412, identity: +/99.95%		Australia	NSW
762. hCoV-19/Australia/NSW168/2020|EPI_ISL_427739|2020-03-21, length: 29412, identity: +/99.94%		Australia	NSW
763. hCoV-19/Australia/NSW169/2020|EPI_ISL_427779|2020-03-24, length: 29412, identity: +/99.97%		Australia	NSW
764. hCoV-19/Australia/NSW170/2020|EPI_ISL_427676|2020-03-22, length: 29412, identity: +/99.95%		Australia	NSW
765. hCoV-19/Australia/NSW171/2020|EPI_ISL_427743|2020-03-21, length: 29412, identity: +/99.95%		Australia	NSW
766. hCoV-19/Australia/NSW174/2020|EPI_ISL_427668|2020-03-21, length: 29412, identity: +/99.95%		Australia	NSW
767. hCoV-19/Australia/NSW175/2020|EPI_ISL_427687|2020-03-18, length: 29412, identity: +/99.95%		Australia	NSW
768. hCoV-19/Australia/NSW176/2020|EPI_ISL_427734|2020-03-18, length: 29412, identity: +/99.83%		Australia	NSW
769. hCoV-19/Australia/NSW177/2020|EPI_ISL_427667|2020-03-23, length: 29412, identity: +/99.95%		Australia	NSW
770. hCoV-19/Australia/NSW178/2020|EPI_ISL_427670|2020-03-21, length: 29412, identity: +/99.95%		Australia	NSW
771. hCoV-19/Australia/NSW179/2020|EPI_ISL_427685|2020-03-23, length: 29412, identity: +/99.93%		Australia	NSW
772. hCoV-19/Australia/NSW180/2020|EPI_ISL_427701|2020-03-22, length: 29412, identity: +/99.95%		Australia	NSW
773. hCoV-19/Australia/NSW181/2020|EPI_ISL_427709|2020-03-21, length: 29412, identity: +/99.95%		Australia	NSW
774. hCoV-19/Australia/NSW182/2020|EPI_ISL_427713|2020-03-21, length: 29412, identity: +/99.95%		Australia	NSW
775. hCoV-19/Australia/NSW183/2020|EPI_ISL_427714|2020-03-21, length: 29412, identity: +/99.95%		Australia	NSW
776. hCoV-19/Australia/NSW184/2020|EPI_ISL_427752|2020-03-24, length: 29412, identity: +/99.95%		Australia	NSW
777. hCoV-19/Australia/NSW185/2020|EPI_ISL_427793|2020-03-26, length: 29412, identity: +/99.95%		Australia	NSW
778. hCoV-19/Australia/NSW186/2020|EPI_ISL_427803|2020-03-24, length: 29412, identity: +/99.95%		Australia	NSW
779. hCoV-19/Australia/NSW187/2020|EPI_ISL_427691|2020-03-22, length: 29412, identity: +/99.95%		Australia	NSW
780. hCoV-19/Australia/NSW188/2020|EPI_ISL_427694|2020-03-22, length: 29412, identity: +/99.95%		Australia	NSW
781. hCoV-19/Australia/NSW189/2020|EPI_ISL_427740|2020-03-21, length: 29412, identity: +/99.95%		Australia	NSW
782. hCoV-19/Australia/NSW190/2020|EPI_ISL_427736|2020-03-16, length: 29412, identity: +/99.95%		Australia	NSW
783. hCoV-19/Australia/NSW191/2020|EPI_ISL_427786|2020-03-25, length: 29412, identity: +/99.95%		Australia	NSW
784. hCoV-19/Australia/NSW192/2020|EPI_ISL_427797|2020-03-26, length: 29412, identity: +/99.95%		Australia	NSW
785. hCoV-19/Australia/NSW193/2020|EPI_ISL_427798|2020-03-20, length: 29412, identity: +/99.95%		Australia	NSW
786. hCoV-19/Australia/NSW194/2020|EPI_ISL_427763|2020-03-23, length: 29412, identity: +/99.95%		Australia	NSW
787. hCoV-19/Australia/NSW195/2020|EPI_ISL_427767|2020-03-22, length: 29412, identity: +/99.95%		Australia	NSW
788. hCoV-19/Australia/NSW196/2020|EPI_ISL_427806|2020-03-26, length: 29412, identity: +/99.95%		Australia	NSW
789. hCoV-19/Australia/NSW197/2020|EPI_ISL_427746|2020-03-21, length: 29412, identity: +/99.95%		Australia	NSW
790. hCoV-19/Australia/NSW198/2020|EPI_ISL_427707|2020-03-23, length: 29412, identity: +/99.91%		Australia	NSW
791. hCoV-19/Australia/NSW199/2020|EPI_ISL_427747|2020-03-22, length: 29412, identity: +/99.95%		Australia	NSW
792. hCoV-19/Australia/NSW200/2020|EPI_ISL_427684|2020-03-23, length: 29412, identity: +/99.94%		Australia	NSW
793. hCoV-19/Australia/NSW201/2020|EPI_ISL_427710|2020-03-21, length: 29412, identity: +/99.94%		Australia	NSW
794. hCoV-19/Australia/NSW202/2020|EPI_ISL_427762|2020-03-22, length: 29412, identity: +/99.95%		Australia	NSW
795. hCoV-19/Australia/NSW203/2020|EPI_ISL_427765|2020-03-22, length: 29412, identity: +/99.95%		Australia	NSW
796. hCoV-19/Australia/NSW204/2020|EPI_ISL_427792|2020-03-25, length: 29412, identity: +/99.95%		Australia	NSW
797. hCoV-19/Australia/NSW205/2020|EPI_ISL_427745|2020-03-21, length: 29412, identity: +/99.86%		Australia	NSW
798. hCoV-19/Australia/NSW206/2020|EPI_ISL_427695|2020-03-22, length: 29412, identity: +/99.94%		Australia	NSW
799. hCoV-19/Australia/NSW207/2020|EPI_ISL_427807|2020-03-23, length: 29412, identity: +/99.94%		Australia	NSW
800. hCoV-19/Australia/NSW208/2020|EPI_ISL_427753|2020-03-24, length: 29412, identity: +/99.94%		Australia	NSW
801. hCoV-19/Australia/NSW209/2020|EPI_ISL_427755|2020-03-23, length: 29412, identity: +/99.94%		Australia	NSW
802. hCoV-19/Australia/NSW210/2020|EPI_ISL_427766|2020-03-25, length: 29412, identity: +/99.95%		Australia	NSW
803. hCoV-19/Australia/NSW213/2020|EPI_ISL_427726|2020-03-19, length: 29412, identity: +/99.94%		Australia	NSW
804. hCoV-19/Australia/NSW214/2020|EPI_ISL_427727|2020-03-17, length: 29412, identity: +/99.94%		Australia	NSW
805. hCoV-19/Australia/NSW215/2020|EPI_ISL_427730|2020-03-17, length: 29412, identity: +/99.94%		Australia	NSW
806. hCoV-19/Australia/NSW216/2020|EPI_ISL_427732|2020-03-17, length: 29412, identity: +/99.94%		Australia	NSW
807. hCoV-19/Australia/NSW217/2020|EPI_ISL_427644|2020-03-02, length: 29412, identity: +/99.96%		Australia	NSW
808. hCoV-19/Australia/NSW218/2020|EPI_ISL_427665|2020-03-11, length: 29412, identity: +/99.96%		Australia	NSW
809. hCoV-19/Australia/NSW219/202|EPI_ISL_427643|2020-02-28, length: 29412, identity: +/99.97%		Australia	NSW
810. hCoV-19/Australia/NSW76/2020|EPI_ISL_427704|2020-03-19, length: 29411, identity: +/99.97%		Australia	NSW
811. hCoV-19/Australia/NSW08/2020|EPI_ISL_413594|2020-02-28, length: 29409, identity: +/99.99%		Australia	NSW
812. hCoV-19/Australia/NSW09/2020|EPI_ISL_413595|2020-02-28, length: 29409, identity: +/99.97%		Australia	NSW
813. hCoV-19/Australia/NSW10/2020|EPI_ISL_413596|2020-02-28, length: 29409, identity: +/99.99%		Australia	NSW
814. hCoV-19/Australia/NSW11/2020|EPI_ISL_413597|2020-03-02, length: 29409, identity: +/99.98%		Australia	NSW
815. hCoV-19/Australia/NSW12/2020|EPI_ISL_413598|2020-03-04, length: 29409, identity: +/99.97%		Australia	NSW
816. hCoV-19/Australia/NSW13/2020|EPI_ISL_413599|2020-03-04, length: 29409, identity: +/99.97%		Australia	NSW
817. hCoV-19/Australia/NSW14/2020|EPI_ISL_413600|2020-03-03, length: 29409, identity: +/99.98%		Australia	NSW
818. hCoV-19/Australia/NSW35/2020|EPI_ISL_417393|2020-03-08, length: 29409, identity: +/99.96%		Australia	NSW
819. hCoV-19/Australia/NSW36/2020|EPI_ISL_417394|2020-03-10, length: 29409, identity: +/99.97%		Australia	NSW
820. hCoV-19/Australia/NSW37/2020|EPI_ISL_417395|2020-03-10, length: 29409, identity: +/99.97%		Australia	NSW
821. hCoV-19/Australia/NSW38/2020|EPI_ISL_417396|2020-03-10, length: 29409, identity: +/99.97%		Australia	NSW
822. hCoV-19/Australia/NSW39/2020|EPI_ISL_417397|2020-03-11, length: 29409, identity: +/99.98%		Australia	NSW
823. hCoV-19/Australia/NSW40/2020|EPI_ISL_417398|2020-03-11, length: 29409, identity: +/99.97%		Australia	NSW
824. hCoV-19/Australia/NSW41/2020|EPI_ISL_417399|2020-03-10, length: 29409, identity: +/99.98%		Australia	NSW
825. hCoV-19/Australia/NSW44/2020|EPI_ISL_417400|2020-03-10, length: 29409, identity: +/99.97%		Australia	NSW
826. hCoV-19/Australia/NSW45/2020|EPI_ISL_417401|2020-03-13, length: 29409, identity: +/99.98%		Australia	NSW
827. hCoV-19/Australia/NSW47/2020|EPI_ISL_417402|2020-03-13, length: 29409, identity: +/99.98%		Australia	NSW
828. hCoV-19/Australia/NSW48/2020|EPI_ISL_417403|2020-03-14, length: 29409, identity: +/99.98%		Australia	NSW
829. hCoV-19/Australia/NSW50/2020|EPI_ISL_417404|2020-03-12, length: 29409, identity: +/99.97%		Australia	NSW
830. hCoV-19/Australia/NSW52/2020|EPI_ISL_417405|2020-03-11, length: 29409, identity: +/99.98%		Australia	NSW
831. hCoV-19/Australia/NSW53/2020|EPI_ISL_417406|2020-03-11, length: 29409, identity: +/99.97%		Australia	NSW
832. hCoV-19/Australia/NSW54/2020|EPI_ISL_417407|2020-03-14, length: 29409, identity: +/99.97%		Australia	NSW
833. hCoV-19/Australia/NSW56/2020|EPI_ISL_417408|2020-03-17, length: 29409, identity: +/99.97%		Australia	NSW
834. hCoV-19/Australia/NSW57/2020|EPI_ISL_417409|2020-03-16, length: 29409, identity: +/99.97%		Australia	NSW
835. hCoV-19/Australia/NSW58/2020|EPI_ISL_417410|2020-03-16, length: 29409, identity: +/99.98%		Australia	NSW
836. hCoV-19/Australia/NSW61/2020|EPI_ISL_417411|2020-03-17, length: 29409, identity: +/99.97%		Australia	NSW
837. hCoV-19/Australia/NSW62/2020|EPI_ISL_417412|2020-03-17, length: 29409, identity: +/99.98%		Australia	NSW
838. hCoV-19/Australia/NSW63/2020|EPI_ISL_427664|2020-03-17, length: 29409, identity: +/99.97%		Australia	NSW
839. hCoV-19/Australia/NSW173/2020|EPI_ISL_427801|2020-03-26, length: 29409, identity: +/99.97%		Australia	NSW
840. hCoV-19/Jordan/SR-033/2020|EPI_ISL_429993|2020-03-16, length: 29409, identity: +/99.97%	overseas
841. hCoV-19/Australia/NSW211/2020|EPI_ISL_427699|2020-03-21, length: 29406, identity: +/99.95%		Australia	NSW
842. hCoV-19/Australia/NSW212/2020|EPI_ISL_427671|2020-03-21, length: 29406, identity: +/99.94%		Australia	NSW
843. hCoV-19/Australia/NSW46/2020|EPI_ISL_427658|2020-03-10, length: 29403, identity: +/99.97%		Australia	NSW
counting	142	702
				Australian state/territory
			211	NSW
			457	VIC
			6	NT
			19	QLD
			9	WA
		sum	702

## Sheet: cluster 1
Cluster 1, No. sequences: 158, Representative: hCoV-19/Australia/VIC683/2020|EPI_ISL_426978|2020-03-29, length:29906	overseas	Australia	state
0. hCoV-19/Australia/VIC683/2020|EPI_ISL_426978|2020-03-29, length: 29906, identity: 100%		Australia	VIC
1. hCoV-19/Australia/NT08/2020|EPI_ISL_426634|2020-03-20, length: 29903, identity: +/99.73%		Australia	NT
2. hCoV-19/Australia/NT10/2020|EPI_ISL_426898|2020-03-26, length: 29903, identity: +/99.67%		Australia	NT
3. hCoV-19/Australia/NT12/2020|EPI_ISL_426900|2020-03-25, length: 29903, identity: +/99.92%		Australia	NT
4. hCoV-19/Australia/NT13/2020|EPI_ISL_426901|2020-03-25, length: 29903, identity: +/99.80%		Australia	NT
5. hCoV-19/Australia/NT29/2020|EPI_ISL_430632|2020, length: 29903, identity: +/99.81%		Australia	NT
6. hCoV-19/Australia/NT31/2020|EPI_ISL_430635|2020, length: 29903, identity: +/99.75%		Australia	NT
7. hCoV-19/Australia/NT32/2020|EPI_ISL_430636|2020, length: 29903, identity: +/99.71%		Australia	NT
8. hCoV-19/Australia/VIC414/2020|EPI_ISL_426714|2020-03-26, length: 29903, identity: +/99.83%		Australia	VIC
9. hCoV-19/Australia/VIC415/2020|EPI_ISL_426715|2020-03-25, length: 29903, identity: +/99.73%		Australia	VIC
10. hCoV-19/Australia/VIC417/2020|EPI_ISL_426717|2020-03-25, length: 29903, identity: +/99.81%		Australia	VIC
11. hCoV-19/Australia/VIC418/2020|EPI_ISL_426718|2020-03-25, length: 29903, identity: +/99.78%		Australia	VIC
12. hCoV-19/Australia/VIC425/2020|EPI_ISL_426725|2020-03-25, length: 29903, identity: +/99.88%		Australia	VIC
13. hCoV-19/Australia/VIC427/2020|EPI_ISL_426727|2020-03-25, length: 29903, identity: +/99.82%		Australia	VIC
14. hCoV-19/Australia/VIC429/2020|EPI_ISL_426729|2020-03-26, length: 29903, identity: +/99.82%		Australia	VIC
15. hCoV-19/Australia/VIC430/2020|EPI_ISL_426730|2020-03-26, length: 29903, identity: +/99.52%		Australia	VIC
16. hCoV-19/Australia/VIC433/2020|EPI_ISL_426732|2020-03-25, length: 29903, identity: +/99.64%		Australia	VIC
17. hCoV-19/Australia/VIC437/2020|EPI_ISL_426734|2020-03-26, length: 29903, identity: +/99.83%		Australia	VIC
18. hCoV-19/Australia/VIC439/2020|EPI_ISL_426736|2020-03-26, length: 29903, identity: +/99.83%		Australia	VIC
19. hCoV-19/Australia/VIC440/2020|EPI_ISL_426737|2020-03-26, length: 29903, identity: +/99.83%		Australia	VIC
20. hCoV-19/Australia/VIC443/2020|EPI_ISL_426740|2020-03-27, length: 29903, identity: +/99.86%		Australia	VIC
21. hCoV-19/Australia/VIC447/2020|EPI_ISL_426743|2020-03-27, length: 29903, identity: +/99.95%		Australia	VIC
22. hCoV-19/Australia/VIC450/2020|EPI_ISL_426746|2020-03-25, length: 29903, identity: +/99.83%		Australia	VIC
23. hCoV-19/Australia/VIC451/2020|EPI_ISL_426747|2020-03-25, length: 29903, identity: +/99.82%		Australia	VIC
24. hCoV-19/Australia/VIC454/2020|EPI_ISL_426750|2020-03-25, length: 29903, identity: +/99.67%		Australia	VIC
25. hCoV-19/Australia/VIC456/2020|EPI_ISL_426751|2020-03-25, length: 29903, identity: +/99.86%		Australia	VIC
26. hCoV-19/Australia/VIC460/2020|EPI_ISL_426753|2020-03-26, length: 29903, identity: +/99.66%		Australia	VIC
27. hCoV-19/Australia/VIC461/2020|EPI_ISL_426754|2020-03-27, length: 29903, identity: +/99.77%		Australia	VIC
28. hCoV-19/Australia/VIC463/2020|EPI_ISL_426756|2020-03-26, length: 29903, identity: +/99.94%		Australia	VIC
29. hCoV-19/Australia/VIC468/2020|EPI_ISL_426761|2020-03-27, length: 29903, identity: +/99.82%		Australia	VIC
30. hCoV-19/Australia/VIC473/2020|EPI_ISL_426906|2020-03-28, length: 29903, identity: +/99.89%		Australia	VIC
31. hCoV-19/Australia/VIC478/2020|EPI_ISL_426910|2020-03-28, length: 29903, identity: +/99.76%		Australia	VIC
32. hCoV-19/Australia/VIC483/2020|EPI_ISL_426914|2020-03-29, length: 29903, identity: +/99.91%		Australia	VIC
33. hCoV-19/Australia/VIC486/2020|EPI_ISL_426917|2020-03-29, length: 29903, identity: +/99.66%		Australia	VIC
34. hCoV-19/Australia/VIC487/2020|EPI_ISL_426918|2020-03-29, length: 29903, identity: +/99.82%		Australia	VIC
35. hCoV-19/Australia/VIC488/2020|EPI_ISL_426919|2020-03-29, length: 29903, identity: +/99.83%		Australia	VIC
36. hCoV-19/Australia/VIC490/2020|EPI_ISL_426921|2020-03-30, length: 29903, identity: +/99.92%		Australia	VIC
37. hCoV-19/Australia/VIC533/2020|EPI_ISL_426799|2020-03-24, length: 29903, identity: +/99.59%		Australia	VIC
38. hCoV-19/Australia/VIC550/2020|EPI_ISL_436689|2020-03-23, length: 29903, identity: +/99.74%		Australia	VIC
39. hCoV-19/Australia/VIC556/2020|EPI_ISL_426817|2020-03-25, length: 29903, identity: +/99.84%		Australia	VIC
40. hCoV-19/Australia/VIC574/2020|EPI_ISL_426833|2020-03-26, length: 29903, identity: +/99.80%		Australia	VIC
41. hCoV-19/Australia/VIC576/2020|EPI_ISL_426835|2020-03-26, length: 29903, identity: +/99.74%		Australia	VIC
42. hCoV-19/Australia/VIC580/2020|EPI_ISL_426837|2020-03-25, length: 29903, identity: +/99.61%		Australia	VIC
43. hCoV-19/Australia/VIC581/2020|EPI_ISL_426838|2020-03-25, length: 29903, identity: +/99.65%		Australia	VIC
44. hCoV-19/Australia/VIC583/2020|EPI_ISL_426840|2020-03-25, length: 29903, identity: +/99.76%		Australia	VIC
45. hCoV-19/Australia/VIC585/2020|EPI_ISL_426842|2020-03-25, length: 29903, identity: +/99.92%		Australia	VIC
46. hCoV-19/Australia/VIC587/2020|EPI_ISL_426844|2020-03-25, length: 29903, identity: +/99.76%		Australia	VIC
47. hCoV-19/Australia/VIC589/2020|EPI_ISL_426846|2020-03-22, length: 29903, identity: +/99.72%		Australia	VIC
48. hCoV-19/Australia/VIC594/2020|EPI_ISL_426851|2020-03-25, length: 29903, identity: +/99.92%		Australia	VIC
49. hCoV-19/Australia/VIC607/2020|EPI_ISL_426862|2020-03-27, length: 29903, identity: +/99.91%		Australia	VIC
50. hCoV-19/Australia/VIC619/2020|EPI_ISL_426923|2020-03-28, length: 29903, identity: +/99.92%		Australia	VIC
51. hCoV-19/Australia/VIC620/2020|EPI_ISL_426924|2020-03-28, length: 29903, identity: +/99.80%		Australia	VIC
52. hCoV-19/Australia/VIC622/2020|EPI_ISL_426926|2020-03-29, length: 29903, identity: +/99.83%		Australia	VIC
53. hCoV-19/Australia/VIC625/2020|EPI_ISL_426929|2020-03-28, length: 29903, identity: +/99.73%		Australia	VIC
54. hCoV-19/Australia/VIC629/2020|EPI_ISL_426873|2020-03-25, length: 29903, identity: +/99.57%		Australia	VIC
55. hCoV-19/Australia/VIC637/2020|EPI_ISL_426933|2020-03-28, length: 29903, identity: +/99.81%		Australia	VIC
56. hCoV-19/Australia/VIC687/2020|EPI_ISL_426981|2020-03-29, length: 29903, identity: +/99.78%		Australia	VIC
57. hCoV-19/Australia/VIC701/2020|EPI_ISL_426878|2020-03-21, length: 29903, identity: +/99.81%		Australia	VIC
58. hCoV-19/Australia/VIC706/2020|EPI_ISL_426993|2020-03-30, length: 29903, identity: +/99.86%		Australia	VIC
59. hCoV-19/Australia/VIC707/2020|EPI_ISL_426994|2020-03-29, length: 29903, identity: +/99.93%		Australia	VIC
60. hCoV-19/Australia/VIC716/2020|EPI_ISL_427001|2020-03-27, length: 29903, identity: +/99.73%		Australia	VIC
61. hCoV-19/Australia/VIC720/2020|EPI_ISL_427003|2020-03-28, length: 29903, identity: +/99.69%		Australia	VIC
62. hCoV-19/Australia/VIC725/2020|EPI_ISL_427006|2020-03-28, length: 29903, identity: +/99.81%		Australia	VIC
63. hCoV-19/Australia/VIC727/2020|EPI_ISL_427007|2020-03-29, length: 29903, identity: +/99.71%		Australia	VIC
64. hCoV-19/Australia/VIC735/2020|EPI_ISL_427014|2020-03-30, length: 29903, identity: +/99.83%		Australia	VIC
65. hCoV-19/Australia/VIC736/2020|EPI_ISL_427015|2020-03-30, length: 29903, identity: +/99.80%		Australia	VIC
66. hCoV-19/Australia/VIC737/2020|EPI_ISL_427016|2020-03-30, length: 29903, identity: +/99.77%		Australia	VIC
67. hCoV-19/Australia/VIC738/2020|EPI_ISL_427017|2020-03-30, length: 29903, identity: +/99.81%		Australia	VIC
68. hCoV-19/Australia/VIC739/2020|EPI_ISL_427018|2020-03-30, length: 29903, identity: +/99.83%		Australia	VIC
69. hCoV-19/Australia/VIC746/2020|EPI_ISL_427024|2020-03-29, length: 29903, identity: +/99.89%		Australia	VIC
70. hCoV-19/Australia/VIC748/2020|EPI_ISL_427026|2020-03-30, length: 29903, identity: +/99.64%		Australia	VIC
71. hCoV-19/Australia/VIC754/2020|EPI_ISL_427031|2020-03-30, length: 29903, identity: +/99.92%		Australia	VIC
72. hCoV-19/Australia/VIC764/2020|EPI_ISL_427040|2020-03-29, length: 29903, identity: +/99.82%		Australia	VIC
73. hCoV-19/Australia/VIC769/2020|EPI_ISL_427046|2020-03-20, length: 29903, identity: +/99.51%		Australia	VIC
74. hCoV-19/Australia/VIC781/2020|EPI_ISL_427056|2020-03-30, length: 29903, identity: +/99.72%		Australia	VIC
75. hCoV-19/Australia/VIC782/2020|EPI_ISL_427057|2020-03-30, length: 29903, identity: +/99.83%		Australia	VIC
76. hCoV-19/Australia/VIC786/2020|EPI_ISL_427061|2020-03-30, length: 29903, identity: +/99.93%		Australia	VIC
77. hCoV-19/Australia/VIC787/2020|EPI_ISL_427062|2020-03-30, length: 29903, identity: +/99.81%		Australia	VIC
78. hCoV-19/Australia/VIC788/2020|EPI_ISL_427063|2020-03-31, length: 29903, identity: +/99.83%		Australia	VIC
79. hCoV-19/Australia/VIC791/2020|EPI_ISL_427066|2020-03-31, length: 29903, identity: +/99.71%		Australia	VIC
80. hCoV-19/Australia/VIC793/2020|EPI_ISL_427068|2020-03-31, length: 29903, identity: +/99.90%		Australia	VIC
81. hCoV-19/Australia/VIC794/2020|EPI_ISL_427069|2020-03-31, length: 29903, identity: +/99.77%		Australia	VIC
82. hCoV-19/Australia/VIC798/2020|EPI_ISL_427072|2020-04-01, length: 29903, identity: +/99.59%		Australia	VIC
83. hCoV-19/Australia/VIC799/2020|EPI_ISL_427073|2020-04-01, length: 29903, identity: +/99.74%		Australia	VIC
84. hCoV-19/Australia/VIC802/2020|EPI_ISL_427076|2020-04-01, length: 29903, identity: +/99.92%		Australia	VIC
85. hCoV-19/Australia/VIC805/2020|EPI_ISL_427079|2020-03-16, length: 29903, identity: +/99.69%		Australia	VIC
86. hCoV-19/Australia/VIC892/2020|EPI_ISL_427144|2020-04-06, length: 29903, identity: +/99.91%		Australia	VIC
87. hCoV-19/Australia/VIC913/2020|EPI_ISL_426882|2020-03-24, length: 29903, identity: +/99.91%		Australia	VIC
88. hCoV-19/Australia/VIC918/2020|EPI_ISL_427152|2020-03-27, length: 29903, identity: +/99.57%		Australia	VIC
89. hCoV-19/Australia/VIC920/2020|EPI_ISL_427153|2020-03-27, length: 29903, identity: +/99.86%		Australia	VIC
90. hCoV-19/Australia/VIC929/2020|EPI_ISL_427157|2020-03-30, length: 29903, identity: +/99.88%		Australia	VIC
91. hCoV-19/Australia/VIC935/2020|EPI_ISL_430471|2020-03-25, length: 29903, identity: +/99.83%		Australia	VIC
92. hCoV-19/Australia/VIC946/2020|EPI_ISL_430640|2020-03-26, length: 29903, identity: +/99.79%		Australia	VIC
93. hCoV-19/Australia/VIC948/2020|EPI_ISL_430647|2020-03-26, length: 29903, identity: +/99.78%		Australia	VIC
94. hCoV-19/Australia/VIC953/2020|EPI_ISL_430645|2020-03-26, length: 29903, identity: +/99.77%		Australia	VIC
95. hCoV-19/Australia/VIC957/2020|EPI_ISL_430649|2020-03-27, length: 29903, identity: +/99.73%		Australia	VIC
96. hCoV-19/Australia/VIC961/2020|EPI_ISL_430654|2020-03-27, length: 29903, identity: +/99.80%		Australia	VIC
97. hCoV-19/Australia/VIC968/2020|EPI_ISL_430651|2020-03-27, length: 29903, identity: +/99.70%		Australia	VIC
98. hCoV-19/Australia/VIC971/2020|EPI_ISL_430661|2020-03-27, length: 29903, identity: +/99.76%		Australia	VIC
99. hCoV-19/Australia/VIC974/2020|EPI_ISL_430659|2020-03-28, length: 29903, identity: +/99.80%		Australia	VIC
100. hCoV-19/Australia/VIC975/2020|EPI_ISL_430658|2020-03-28, length: 29903, identity: +/99.78%		Australia	VIC
101. hCoV-19/Australia/VIC984/2020|EPI_ISL_430552|2020-03-30, length: 29903, identity: +/99.72%		Australia	VIC
102. hCoV-19/Australia/VIC991/2020|EPI_ISL_430474|2020-03-31, length: 29903, identity: +/99.74%		Australia	VIC
103. hCoV-19/Australia/VIC994/2020|EPI_ISL_430478|2020-03-31, length: 29903, identity: +/99.82%		Australia	VIC
104. hCoV-19/Australia/VIC997/2020|EPI_ISL_430481|2020-03-31, length: 29903, identity: +/99.82%		Australia	VIC
105. hCoV-19/Australia/VIC998/2020|EPI_ISL_430482|2020-03-31, length: 29903, identity: +/99.81%		Australia	VIC
106. hCoV-19/Australia/VIC1002/2020|EPI_ISL_430486|2020-03-31, length: 29903, identity: +/99.80%		Australia	VIC
107. hCoV-19/Australia/VIC1008/2020|EPI_ISL_430473|2020-03-31, length: 29903, identity: +/99.80%		Australia	VIC
108. hCoV-19/Australia/VIC1013/2020|EPI_ISL_430553|2020-04-01, length: 29903, identity: +/99.63%		Australia	VIC
109. hCoV-19/Australia/VIC1015/2020|EPI_ISL_430559|2020-04-01, length: 29903, identity: +/99.65%		Australia	VIC
110. hCoV-19/Australia/VIC1016/2020|EPI_ISL_430476|2020-04-01, length: 29903, identity: +/99.83%		Australia	VIC
111. hCoV-19/Australia/VIC1018/2020|EPI_ISL_430490|2020-04-01, length: 29903, identity: +/99.82%		Australia	VIC
112. hCoV-19/Australia/VIC1023/2020|EPI_ISL_430530|2020-04-02, length: 29903, identity: +/99.56%		Australia	VIC
113. hCoV-19/Australia/VIC1081/2020|EPI_ISL_430580|2020-04-06, length: 29903, identity: +/99.68%		Australia	VIC
114. hCoV-19/Australia/VIC1085/2020|EPI_ISL_430587|2020-04-06, length: 29903, identity: +/99.65%		Australia	VIC
115. hCoV-19/Australia/VIC1104/2020|EPI_ISL_430585|2020-04-07, length: 29903, identity: +/99.59%		Australia	VIC
116. hCoV-19/Australia/VIC1107/2020|EPI_ISL_430590|2020-04-07, length: 29903, identity: +/99.78%		Australia	VIC
117. hCoV-19/Australia/VIC1109/2020|EPI_ISL_430618|2020-04-07, length: 29903, identity: +/99.74%		Australia	VIC
118. hCoV-19/Australia/VIC1110/2020|EPI_ISL_430569|2020-04-07, length: 29903, identity: +/99.65%		Australia	VIC
119. hCoV-19/Australia/VIC1113/2020|EPI_ISL_430575|2020-04-07, length: 29903, identity: +/99.73%		Australia	VIC
120. hCoV-19/Australia/VIC1114/2020|EPI_ISL_430576|2020-04-07, length: 29903, identity: +/99.71%		Australia	VIC
121. hCoV-19/Australia/VIC1133/2020|EPI_ISL_430596|2020-04-08, length: 29903, identity: +/99.80%		Australia	VIC
122. hCoV-19/Australia/VIC1134/2020|EPI_ISL_430600|2020-04-08, length: 29903, identity: +/99.80%		Australia	VIC
123. hCoV-19/Australia/VIC1137/2020|EPI_ISL_430607|2020-04-08, length: 29903, identity: +/99.81%		Australia	VIC
124. hCoV-19/Australia/VIC1138/2020|EPI_ISL_430609|2020-04-08, length: 29903, identity: +/99.81%		Australia	VIC
125. hCoV-19/Australia/VIC1139/2020|EPI_ISL_430610|2020-04-08, length: 29903, identity: +/99.82%		Australia	VIC
126. hCoV-19/Australia/VIC1143/2020|EPI_ISL_430614|2020-04-08, length: 29903, identity: +/99.82%		Australia	VIC
127. hCoV-19/Australia/VIC1160/2020|EPI_ISL_430605|2020-04-09, length: 29903, identity: +/99.82%		Australia	VIC
128. hCoV-19/Australia/VIC1162/2020|EPI_ISL_430616|2020-04-09, length: 29903, identity: +/99.79%		Australia	VIC
129. hCoV-19/Australia/VIC1189/2020|EPI_ISL_430521|2020-03-23, length: 29903, identity: +/99.75%		Australia	VIC
130. hCoV-19/Australia/VIC1192/2020|EPI_ISL_430528|2020-03-30, length: 29903, identity: +/99.76%		Australia	VIC
131. hCoV-19/Australia/VIC1198/2020|EPI_ISL_430507|2020-03-31, length: 29903, identity: +/99.72%		Australia	VIC
132. hCoV-19/Australia/VIC1199/2020|EPI_ISL_430523|2020-03-31, length: 29903, identity: +/99.67%		Australia	VIC
133. hCoV-19/Australia/VIC1200/2020|EPI_ISL_430527|2020-03-31, length: 29903, identity: +/99.73%		Australia	VIC
134. hCoV-19/Australia/VIC1208/2020|EPI_ISL_430498|2020-04-01, length: 29903, identity: +/99.75%		Australia	VIC
135. hCoV-19/Australia/VIC1210/2020|EPI_ISL_430500|2020-04-01, length: 29903, identity: +/99.80%		Australia	VIC
136. hCoV-19/Australia/VIC1211/2020|EPI_ISL_430501|2020-04-01, length: 29903, identity: +/99.55%		Australia	VIC
137. hCoV-19/Australia/VIC1214/2020|EPI_ISL_430505|2020-04-01, length: 29903, identity: +/99.75%		Australia	VIC
138. hCoV-19/Australia/VIC1222/2020|EPI_ISL_430519|2020-04-01, length: 29903, identity: +/99.81%		Australia	VIC
139. hCoV-19/Australia/VIC1224/2020|EPI_ISL_430522|2020-04-01, length: 29903, identity: +/99.79%		Australia	VIC
140. hCoV-19/Australia/VIC1230/2020|EPI_ISL_436688|2020-04-02, length: 29903, identity: +/99.73%		Australia	VIC
141. hCoV-19/Australia/VIC1235/2020|EPI_ISL_430512|2020-04-02, length: 29903, identity: +/99.78%		Australia	VIC
142. hCoV-19/Australia/VIC1248/2020|EPI_ISL_436114|2020-04-09, length: 29903, identity: +/99.75%		Australia	VIC
143. hCoV-19/Australia/VIC1255/2020|EPI_ISL_436119|2020-04-11, length: 29903, identity: +/99.82%		Australia	VIC
144. hCoV-19/Australia/VIC1256/2020|EPI_ISL_436120|2020-04-11, length: 29903, identity: +/99.79%		Australia	VIC
145. hCoV-19/Australia/VIC1273/2020|EPI_ISL_436131|2020-04-14, length: 29903, identity: +/99.78%		Australia	VIC
146. hCoV-19/Australia/VIC1292/2020|EPI_ISL_430711|2020-04-09, length: 29903, identity: +/99.71%		Australia	VIC
147. hCoV-19/Australia/VIC1353/2020|EPI_ISL_430716|2020-04-12, length: 29903, identity: +/99.70%		Australia	VIC
148. hCoV-19/Australia/VIC1355/2020|EPI_ISL_430638|2020-04-09, length: 29903, identity: +/99.77%		Australia	VIC
149. hCoV-19/Australia/VIC421/2020|EPI_ISL_426721|2020-03-25, length: 29902, identity: +/99.82%		Australia	VIC
150. hCoV-19/Australia/VIC434/2020|EPI_ISL_426733|2020-03-25, length: 29901, identity: +/99.76%		Australia	VIC
151. hCoV-19/Australia/VIC729/2020|EPI_ISL_427008|2020-03-29, length: 29901, identity: +/99.75%		Australia	VIC
152. hCoV-19/Australia/VIC916/2020|EPI_ISL_427151|2020-03-26, length: 29901, identity: +/99.75%		Australia	VIC
153. hCoV-19/Australia/VIC1132/2020|EPI_ISL_430593|2020-04-08, length: 29901, identity: +/99.77%		Australia	VIC
154. hCoV-19/Australia/VIC438/2020|EPI_ISL_426735|2020-03-26, length: 29900, identity: +/99.92%		Australia	VIC
155. hCoV-19/Australia/VIC999/2020|EPI_ISL_430483|2020-03-31, length: 29899, identity: +/99.82%		Australia	VIC
156. hCoV-19/Australia/VIC653/2020|EPI_ISL_426949|2020-03-28, length: 29888, identity: +/99.57%		Australia	VIC
157. hCoV-19/Australia/VIC212/2020|EPI_ISL_419907|2020-03-20, length: 29865, identity: +/99.82%		Australia	VIC
counting	0	158
				Australian state/territory
			0	NSW
			151	VIC
			7	NT
			0	QLD
			0	WA

## Sheet: cluster 2
Cluster 2, No. sequences: 104, Representative: hCoV-19/Australia/NT30/2020|EPI_ISL_430633|2020, length:29903	overseas	Australia	states
0. hCoV-19/Australia/NT30/2020|EPI_ISL_430633|2020, length: 29903, identity: 100%		Australia	NT
1. hCoV-19/Australia/VIC471/2020|EPI_ISL_426763|2020-03-26, length: 29903, identity: +/99.64%		Australia	VIC
2. hCoV-19/Australia/VIC475/2020|EPI_ISL_426907|2020-03-28, length: 29903, identity: +/99.59%		Australia	VIC
3. hCoV-19/Australia/VIC489/2020|EPI_ISL_426920|2020-03-29, length: 29903, identity: +/99.63%		Australia	VIC
4. hCoV-19/Australia/VIC494/2020|EPI_ISL_426767|2020-03-23, length: 29903, identity: +/99.68%		Australia	VIC
5. hCoV-19/Australia/VIC495/2020|EPI_ISL_426768|2020-03-23, length: 29903, identity: +/99.72%		Australia	VIC
6. hCoV-19/Australia/VIC496/2020|EPI_ISL_426769|2020-03-23, length: 29903, identity: +/99.63%		Australia	VIC
7. hCoV-19/Australia/VIC498/2020|EPI_ISL_426771|2020-03-23, length: 29903, identity: +/99.71%		Australia	VIC
8. hCoV-19/Australia/VIC504/2020|EPI_ISL_426775|2020-03-23, length: 29903, identity: +/99.70%		Australia	VIC
9. hCoV-19/Australia/VIC520/2020|EPI_ISL_426789|2020-03-23, length: 29903, identity: +/99.71%		Australia	VIC
10. hCoV-19/Australia/VIC525/2020|EPI_ISL_426792|2020-03-24, length: 29903, identity: +/99.69%		Australia	VIC
11. hCoV-19/Australia/VIC530/2020|EPI_ISL_426796|2020-03-23, length: 29903, identity: +/99.70%		Australia	VIC
12. hCoV-19/Australia/VIC531/2020|EPI_ISL_426797|2020-03-24, length: 29903, identity: +/99.70%		Australia	VIC
13. hCoV-19/Australia/VIC534/2020|EPI_ISL_426800|2020-03-25, length: 29903, identity: +/99.66%		Australia	VIC
14. hCoV-19/Australia/VIC536/2020|EPI_ISL_426802|2020-03-24, length: 29903, identity: +/99.70%		Australia	VIC
15. hCoV-19/Australia/VIC540/2020|EPI_ISL_426805|2020-03-24, length: 29903, identity: +/99.70%		Australia	VIC
16. hCoV-19/Australia/VIC541/2020|EPI_ISL_426806|2020-03-24, length: 29903, identity: +/99.71%		Australia	VIC
17. hCoV-19/Australia/VIC546/2020|EPI_ISL_426809|2020-03-24, length: 29903, identity: +/99.64%		Australia	VIC
18. hCoV-19/Australia/VIC548/2020|EPI_ISL_426811|2020-03-25, length: 29903, identity: +/99.70%		Australia	VIC
19. hCoV-19/Australia/VIC561/2020|EPI_ISL_426822|2020-03-25, length: 29903, identity: +/99.70%		Australia	VIC
20. hCoV-19/Australia/VIC563/2020|EPI_ISL_426824|2020-03-24, length: 29903, identity: +/99.72%		Australia	VIC
21. hCoV-19/Australia/VIC566/2020|EPI_ISL_426826|2020-03-25, length: 29903, identity: +/99.70%		Australia	VIC
22. hCoV-19/Australia/VIC582/2020|EPI_ISL_426839|2020-03-25, length: 29903, identity: +/99.77%		Australia	VIC
23. hCoV-19/Australia/VIC591/2020|EPI_ISL_426848|2020-03-22, length: 29903, identity: +/99.72%		Australia	VIC
24. hCoV-19/Australia/VIC593/2020|EPI_ISL_426850|2020-03-23, length: 29903, identity: +/99.73%		Australia	VIC
25. hCoV-19/Australia/VIC595/2020|EPI_ISL_426852|2020-03-25, length: 29903, identity: +/99.65%		Australia	VIC
26. hCoV-19/Australia/VIC596/2020|EPI_ISL_426853|2020-03-25, length: 29903, identity: +/99.65%		Australia	VIC
27. hCoV-19/Australia/VIC597/2020|EPI_ISL_426854|2020-03-25, length: 29903, identity: +/99.70%		Australia	VIC
28. hCoV-19/Australia/VIC599/2020|EPI_ISL_426856|2020-03-25, length: 29903, identity: +/99.68%		Australia	VIC
29. hCoV-19/Australia/VIC603/2020|EPI_ISL_426858|2020-03-26, length: 29903, identity: +/99.67%		Australia	VIC
30. hCoV-19/Australia/VIC626/2020|EPI_ISL_426930|2020-03-28, length: 29903, identity: +/99.53%		Australia	VIC
31. hCoV-19/Australia/VIC635/2020|EPI_ISL_426876|2020-03-28, length: 29903, identity: +/99.73%		Australia	VIC
32. hCoV-19/Australia/VIC644/2020|EPI_ISL_426940|2020-03-28, length: 29903, identity: +/99.70%		Australia	VIC
33. hCoV-19/Australia/VIC651/2020|EPI_ISL_426947|2020-03-28, length: 29903, identity: +/99.56%		Australia	VIC
34. hCoV-19/Australia/VIC655/2020|EPI_ISL_426951|2020-03-28, length: 29903, identity: +/99.72%		Australia	VIC
35. hCoV-19/Australia/VIC657/2020|EPI_ISL_426953|2020-03-28, length: 29903, identity: +/99.63%		Australia	VIC
36. hCoV-19/Australia/VIC658/2020|EPI_ISL_426954|2020-03-28, length: 29903, identity: +/99.67%		Australia	VIC
37. hCoV-19/Australia/VIC659/2020|EPI_ISL_426955|2020-03-27, length: 29903, identity: +/99.73%		Australia	VIC
38. hCoV-19/Australia/VIC660/2020|EPI_ISL_426956|2020-03-28, length: 29903, identity: +/99.73%		Australia	VIC
39. hCoV-19/Australia/VIC661/2020|EPI_ISL_426957|2020-03-27, length: 29903, identity: +/99.68%		Australia	VIC
40. hCoV-19/Australia/VIC664/2020|EPI_ISL_426960|2020-03-27, length: 29903, identity: +/99.68%		Australia	VIC
41. hCoV-19/Australia/VIC665/2020|EPI_ISL_426961|2020-03-27, length: 29903, identity: +/99.71%		Australia	VIC
42. hCoV-19/Australia/VIC668/2020|EPI_ISL_426964|2020-03-27, length: 29903, identity: +/99.68%		Australia	VIC
43. hCoV-19/Australia/VIC672/2020|EPI_ISL_426968|2020-03-27, length: 29903, identity: +/99.70%		Australia	VIC
44. hCoV-19/Australia/VIC674/2020|EPI_ISL_426970|2020-03-27, length: 29903, identity: +/99.66%		Australia	VIC
45. hCoV-19/Australia/VIC682/2020|EPI_ISL_426977|2020-03-29, length: 29903, identity: +/99.71%		Australia	VIC
46. hCoV-19/Australia/VIC696/2020|EPI_ISL_426988|2020-03-28, length: 29903, identity: +/99.60%		Australia	VIC
47. hCoV-19/Australia/VIC718/2020|EPI_ISL_427002|2020-03-27, length: 29903, identity: +/99.69%		Australia	VIC
48. hCoV-19/Australia/VIC732/2020|EPI_ISL_427011|2020-03-30, length: 29903, identity: +/99.66%		Australia	VIC
49. hCoV-19/Australia/VIC733/2020|EPI_ISL_427012|2020-03-30, length: 29903, identity: +/99.67%		Australia	VIC
50. hCoV-19/Australia/VIC734/2020|EPI_ISL_427013|2020-03-30, length: 29903, identity: +/99.66%		Australia	VIC
51. hCoV-19/Australia/VIC744/2020|EPI_ISL_427022|2020-03-29, length: 29903, identity: +/99.74%		Australia	VIC
52. hCoV-19/Australia/VIC745/2020|EPI_ISL_427023|2020-03-29, length: 29903, identity: +/99.77%		Australia	VIC
53. hCoV-19/Australia/VIC747/2020|EPI_ISL_427025|2020-03-31, length: 29903, identity: +/99.59%		Australia	VIC
54. hCoV-19/Australia/VIC765/2020|EPI_ISL_427041|2020-03-29, length: 29903, identity: +/99.75%		Australia	VIC
55. hCoV-19/Australia/VIC772/2020|EPI_ISL_427048|2020-03-20, length: 29903, identity: +/99.69%		Australia	VIC
56. hCoV-19/Australia/VIC773/2020|EPI_ISL_427049|2020-03-20, length: 29903, identity: +/99.56%		Australia	VIC
57. hCoV-19/Australia/VIC780/2020|EPI_ISL_427055|2020-03-30, length: 29903, identity: +/99.67%		Australia	VIC
58. hCoV-19/Australia/VIC783/2020|EPI_ISL_427058|2020-03-30, length: 29903, identity: +/99.72%		Australia	VIC
59. hCoV-19/Australia/VIC785/2020|EPI_ISL_427060|2020-03-30, length: 29903, identity: +/99.70%		Australia	VIC
60. hCoV-19/Australia/VIC797/2020|EPI_ISL_427071|2020-04-01, length: 29903, identity: +/99.66%		Australia	VIC
61. hCoV-19/Australia/VIC800/2020|EPI_ISL_427074|2020-04-01, length: 29903, identity: +/99.66%		Australia	VIC
62. hCoV-19/Australia/VIC870/2020|EPI_ISL_427125|2020-04-05, length: 29903, identity: +/99.69%		Australia	VIC
63. hCoV-19/Australia/VIC938/2020|EPI_ISL_430472|2020-03-25, length: 29903, identity: +/99.67%		Australia	VIC
64. hCoV-19/Australia/VIC942/2020|EPI_ISL_430639|2020-03-26, length: 29903, identity: +/99.71%		Australia	VIC
65. hCoV-19/Australia/VIC951/2020|EPI_ISL_430646|2020-03-26, length: 29903, identity: +/99.66%		Australia	VIC
66. hCoV-19/Australia/VIC959/2020|EPI_ISL_430663|2020-03-27, length: 29903, identity: +/99.65%		Australia	VIC
67. hCoV-19/Australia/VIC964/2020|EPI_ISL_430655|2020-03-27, length: 29903, identity: +/99.71%		Australia	VIC
68. hCoV-19/Australia/VIC966/2020|EPI_ISL_430653|2020-03-27, length: 29903, identity: +/99.70%		Australia	VIC
69. hCoV-19/Australia/VIC989/2020|EPI_ISL_430551|2020-03-31, length: 29903, identity: +/99.71%		Australia	VIC
70. hCoV-19/Australia/VIC995/2020|EPI_ISL_430479|2020-03-31, length: 29903, identity: +/99.70%		Australia	VIC
71. hCoV-19/Australia/VIC1000/2020|EPI_ISL_430484|2020-03-31, length: 29903, identity: +/99.71%		Australia	VIC
72. hCoV-19/Australia/VIC1011/2020|EPI_ISL_430547|2020-04-01, length: 29903, identity: +/99.70%		Australia	VIC
73. hCoV-19/Australia/VIC1025/2020|EPI_ISL_430532|2020-04-02, length: 29903, identity: +/99.62%		Australia	VIC
74. hCoV-19/Australia/VIC1037/2020|EPI_ISL_430533|2020-04-03, length: 29903, identity: +/99.70%		Australia	VIC
75. hCoV-19/Australia/VIC1039/2020|EPI_ISL_430535|2020-04-03, length: 29903, identity: +/99.78%		Australia	VIC
76. hCoV-19/Australia/VIC1041/2020|EPI_ISL_430536|2020-04-03, length: 29903, identity: +/99.70%		Australia	VIC
77. hCoV-19/Australia/VIC1042/2020|EPI_ISL_430538|2020-04-03, length: 29903, identity: +/99.66%		Australia	VIC
78. hCoV-19/Australia/VIC1043/2020|EPI_ISL_430539|2020-04-03, length: 29903, identity: +/99.68%		Australia	VIC
79. hCoV-19/Australia/VIC1056/2020|EPI_ISL_430669|2020-04-03, length: 29903, identity: +/99.66%		Australia	VIC
80. hCoV-19/Australia/VIC1062/2020|EPI_ISL_430578|2020-04-04, length: 29903, identity: +/99.70%		Australia	VIC
81. hCoV-19/Australia/VIC1067/2020|EPI_ISL_430670|2020-04-04, length: 29903, identity: +/99.72%		Australia	VIC
82. hCoV-19/Australia/VIC1071/2020|EPI_ISL_430581|2020-04-05, length: 29903, identity: +/99.59%		Australia	VIC
83. hCoV-19/Australia/VIC1080/2020|EPI_ISL_430579|2020-04-06, length: 29903, identity: +/99.70%		Australia	VIC
84. hCoV-19/Australia/VIC1086/2020|EPI_ISL_430597|2020-04-06, length: 29903, identity: +/99.73%		Australia	VIC
85. hCoV-19/Australia/VIC1087/2020|EPI_ISL_430574|2020-04-06, length: 29903, identity: +/99.62%		Australia	VIC
86. hCoV-19/Australia/VIC1094/2020|EPI_ISL_430583|2020-04-07, length: 29903, identity: +/99.61%		Australia	VIC
87. hCoV-19/Australia/VIC1103/2020|EPI_ISL_430584|2020-04-07, length: 29903, identity: +/99.55%		Australia	VIC
88. hCoV-19/Australia/VIC1112/2020|EPI_ISL_430573|2020-04-07, length: 29903, identity: +/99.72%		Australia	VIC
89. hCoV-19/Australia/VIC1115/2020|EPI_ISL_430577|2020-04-07, length: 29903, identity: +/99.68%		Australia	VIC
90. hCoV-19/Australia/VIC1119/2020|EPI_ISL_430567|2020-04-08, length: 29903, identity: +/99.69%		Australia	VIC
91. hCoV-19/Australia/VIC1135/2020|EPI_ISL_430601|2020-04-08, length: 29903, identity: +/99.70%		Australia	VIC
92. hCoV-19/Australia/VIC1144/2020|EPI_ISL_430619|2020-04-08, length: 29903, identity: +/99.68%		Australia	VIC
93. hCoV-19/Australia/VIC1157/2020|EPI_ISL_430598|2020-04-09, length: 29903, identity: +/99.71%		Australia	VIC
94. hCoV-19/Australia/VIC1158/2020|EPI_ISL_430602|2020-04-09, length: 29903, identity: +/99.71%		Australia	VIC
95. hCoV-19/Australia/VIC1161/2020|EPI_ISL_430615|2020-04-09, length: 29903, identity: +/99.73%		Australia	VIC
96. hCoV-19/Australia/VIC1279/2020|EPI_ISL_430678|2020-04-07, length: 29903, identity: +/99.72%		Australia	VIC
97. hCoV-19/Australia/VIC1284/2020|EPI_ISL_430701|2020-04-09, length: 29903, identity: +/99.66%		Australia	VIC
98. hCoV-19/Australia/VIC1300/2020|EPI_ISL_430677|2020-04-10, length: 29903, identity: +/99.69%		Australia	VIC
99. hCoV-19/Australia/VIC1328/2020|EPI_ISL_430695|2020-04-12, length: 29903, identity: +/99.68%		Australia	VIC
100. hCoV-19/Australia/VIC663/2020|EPI_ISL_426959|2020-03-28, length: 29900, identity: +/99.67%		Australia	VIC
101. hCoV-19/Australia/VIC679/2020|EPI_ISL_426974|2020-03-27, length: 29900, identity: +/99.57%		Australia	VIC
102. hCoV-19/Australia/VIC742/2020|EPI_ISL_427020|2020-03-29, length: 29897, identity: +/99.82%		Australia	VIC
103. hCoV-19/Australia/VIC753/2020|EPI_ISL_427030|2020-03-30, length: 29883, identity: +/99.57%		Australia	VIC

## Sheet: cluster 3
Cluster 3, No. sequences: 24, Representative: hCoV-19/Australia/NT06/2020|EPI_ISL_426633|2020-03-19, length:29903	overseas	Australia	state
0. hCoV-19/Australia/NT06/2020|EPI_ISL_426633|2020-03-19, length: 29903, identity: 100%		Australia	NT
1. hCoV-19/Australia/NT14/2020|EPI_ISL_426902|2020-03-26, length: 29903, identity: +/99.58%		Australia	NT
2. hCoV-19/Australia/NT36/2020|EPI_ISL_430494|2020, length: 29903, identity: +/99.57%		Australia	NT
3. hCoV-19/Australia/VIC408/2020|EPI_ISL_426710|2020-03-26, length: 29903, identity: +/99.79%		Australia	VIC
4. hCoV-19/Australia/VIC410/2020|EPI_ISL_426712|2020-03-26, length: 29903, identity: +/99.78%		Australia	VIC
5. hCoV-19/Australia/VIC413/2020|EPI_ISL_426713|2020-03-26, length: 29903, identity: +/99.77%		Australia	VIC
6. hCoV-19/Australia/VIC426/2020|EPI_ISL_426726|2020-03-25, length: 29903, identity: +/99.74%		Australia	VIC
7. hCoV-19/Australia/VIC467/2020|EPI_ISL_426760|2020-03-27, length: 29903, identity: +/99.67%		Australia	VIC
8. hCoV-19/Australia/VIC476/2020|EPI_ISL_426908|2020-03-28, length: 29903, identity: +/99.72%		Australia	VIC
9. hCoV-19/Australia/VIC481/2020|EPI_ISL_426912|2020-03-29, length: 29903, identity: +/99.71%		Australia	VIC
10. hCoV-19/Australia/VIC510/2020|EPI_ISL_426780|2020-03-23, length: 29903, identity: +/99.63%		Australia	VIC
11. hCoV-19/Australia/VIC562/2020|EPI_ISL_426823|2020-03-24, length: 29903, identity: +/99.82%		Australia	VIC
12. hCoV-19/Australia/VIC575/2020|EPI_ISL_426834|2020-03-26, length: 29903, identity: +/99.67%		Australia	VIC
13. hCoV-19/Australia/VIC704/2020|EPI_ISL_426991|2020-03-26, length: 29903, identity: +/99.74%		Australia	VIC
14. hCoV-19/Australia/VIC713/2020|EPI_ISL_427000|2020-03-29, length: 29903, identity: +/99.83%		Australia	VIC
15. hCoV-19/Australia/VIC766/2020|EPI_ISL_427042|2020-03-18, length: 29903, identity: +/99.60%		Australia	VIC
16. hCoV-19/Australia/VIC774/2020|EPI_ISL_427050|2020-03-18, length: 29903, identity: +/99.84%		Australia	VIC
17. hCoV-19/Australia/VIC784/2020|EPI_ISL_427059|2020-03-30, length: 29903, identity: +/99.63%		Australia	VIC
18. hCoV-19/Australia/VIC803/2020|EPI_ISL_427077|2020-04-01, length: 29903, identity: +/99.67%		Australia	VIC
19. hCoV-19/Australia/VIC819/2020|EPI_ISL_427091|2020-04-03, length: 29903, identity: +/99.57%		Australia	VIC
20. hCoV-19/Australia/VIC888/2020|EPI_ISL_427141|2020-04-06, length: 29903, identity: +/99.57%		Australia	VIC
21. hCoV-19/Australia/VIC930/2020|EPI_ISL_427158|2020-03-30, length: 29903, identity: +/99.82%		Australia	VIC
22. hCoV-19/Australia/VIC1212/2020|EPI_ISL_430502|2020-04-01, length: 29903, identity: +/99.57%		Australia	VIC
23. hCoV-19/Australia/VIC709/2020|EPI_ISL_426996|2020-03-29, length: 29900, identity: +/99.61%		Australia	VIC

## Sheet: cluster 4
Cluster 4, No. sequences: 22, Representative: hCoV-19/Australia/VIC895/2020|EPI_ISL_427147|2020-04-06, length:29906	overseas	australia	state
0. hCoV-19/Australia/VIC895/2020|EPI_ISL_427147|2020-04-06, length: 29906, identity: 100%		Australia	VIC
1. hCoV-19/Australia/NT16/2020|EPI_ISL_426903|2020-03-24, length: 29903, identity: +/99.80%		Australia	NT
2. hCoV-19/Australia/VIC406/2020|EPI_ISL_426708|2020-03-25, length: 29903, identity: +/99.54%		Australia	VIC
3. hCoV-19/Australia/VIC444/2020|EPI_ISL_426741|2020-03-27, length: 29903, identity: +/99.61%		Australia	VIC
4. hCoV-19/Australia/VIC482/2020|EPI_ISL_426913|2020-03-28, length: 29903, identity: +/99.85%		Australia	VIC
5. hCoV-19/Australia/VIC493/2020|EPI_ISL_426766|2020-03-22, length: 29903, identity: +/99.60%		Australia	VIC
6. hCoV-19/Australia/VIC508/2020|EPI_ISL_426778|2020-03-23, length: 29903, identity: +/99.77%		Australia	VIC
7. hCoV-19/Australia/VIC512/2020|EPI_ISL_426782|2020-03-23, length: 29903, identity: +/99.80%		Australia	VIC
8. hCoV-19/Australia/VIC513/2020|EPI_ISL_426783|2020-03-23, length: 29903, identity: +/99.79%		Australia	VIC
9. hCoV-19/Australia/VIC514/2020|EPI_ISL_426784|2020-03-23, length: 29903, identity: +/99.87%		Australia	VIC
10. hCoV-19/Australia/VIC518/2020|EPI_ISL_426788|2020-03-23, length: 29903, identity: +/99.67%		Australia	VIC
11. hCoV-19/Australia/VIC537/2020|EPI_ISL_426803|2020-03-24, length: 29903, identity: +/99.65%		Australia	VIC
12. hCoV-19/Australia/VIC553/2020|EPI_ISL_426814|2020-03-25, length: 29903, identity: +/99.82%		Australia	VIC
13. hCoV-19/Australia/VIC612/2020|EPI_ISL_426866|2020-03-26, length: 29903, identity: +/99.78%		Australia	VIC
14. hCoV-19/Australia/VIC669/2020|EPI_ISL_426965|2020-03-27, length: 29903, identity: +/99.71%		Australia	VIC
15. hCoV-19/Australia/VIC705/2020|EPI_ISL_426992|2020-03-30, length: 29903, identity: +/99.57%		Australia	VIC
16. hCoV-19/Australia/VIC821/2020|EPI_ISL_427093|2020-04-03, length: 29903, identity: +/99.84%		Australia	VIC
17. hCoV-19/Australia/VIC893/2020|EPI_ISL_427145|2020-04-06, length: 29903, identity: +/99.75%		Australia	VIC
18. hCoV-19/Australia/VIC894/2020|EPI_ISL_427146|2020-04-06, length: 29903, identity: +/99.73%		Australia	VIC
19. hCoV-19/Australia/VIC1275/2020|EPI_ISL_430687|2020-03-25, length: 29903, identity: +/99.63%		Australia	VIC
20. hCoV-19/Australia/VIC1319/2020|EPI_ISL_430700|2020-04-11, length: 29903, identity: +/99.81%		Australia	VIC
21. hCoV-19/Australia/VIC515/2020|EPI_ISL_426785|2020-03-23, length: 29902, identity: +/99.72%		Australia	VIC

## Sheet: cluster 5
Cluster 5, No. sequences: 18, Representative: hCoV-19/Australia/VIC1305/2020|EPI_ISL_430705|2020-04-10, length:29903	overseas	australia	state
0. hCoV-19/Australia/VIC1305/2020|EPI_ISL_430705|2020-04-10, length: 29903, identity: 100%		Australia	VIC
1. hCoV-19/Australia/VIC1313/2020|EPI_ISL_430714|2020-04-10, length: 29903, identity: +/99.66%		Australia	VIC
2. hCoV-19/Australia/VIC1315/2020|EPI_ISL_430689|2020-04-11, length: 29903, identity: +/99.73%		Australia	VIC
3. hCoV-19/Australia/VIC1316/2020|EPI_ISL_430690|2020-04-11, length: 29903, identity: +/99.74%		Australia	VIC
4. hCoV-19/Australia/VIC1318/2020|EPI_ISL_430693|2020-04-11, length: 29903, identity: +/99.73%		Australia	VIC
5. hCoV-19/Australia/VIC1329/2020|EPI_ISL_430696|2020-04-12, length: 29903, identity: +/99.74%		Australia	VIC
6. hCoV-19/Australia/VIC1336/2020|EPI_ISL_430698|2020-04-13, length: 29903, identity: +/99.68%		Australia	VIC
7. hCoV-19/Australia/VIC1344/2020|EPI_ISL_430697|2020-04-14, length: 29903, identity: +/99.74%		Australia	VIC
8. hCoV-19/DK/ALAB-SSI-133/2020|EPI_ISL_437642|2020-03-08, length: 29903, identity: +/99.64%	overseas
9. hCoV-19/Gambia/GC19-015/2020|EPI_ISL_428855|2020-03-17, length: 29903, identity: +/99.63%	overseas
10. hCoV-19/Germany/BAV-MVP0005/2020|EPI_ISL_437206|2020-03-18, length: 29903, identity: +/99.70%	overseas
11. hCoV-19/Ireland/21023/2020|EPI_ISL_418516|2020-03-06, length: 29903, identity: +/99.63%	overseas
12. hCoV-19/Serbia/KV26-04/2020|EPI_ISL_437435|2020-04-04, length: 29903, identity: +/99.63%	overseas
13. hCoV-19/Australia/VIC365/2020|EPI_ISL_426673|2020-03-22, length: 29902, identity: +/99.76%		Australia	VIC
14. hCoV-19/Australia/VIC535/2020|EPI_ISL_426801|2020-03-25, length: 29900, identity: +/99.76%		Australia	VIC
15. hCoV-19/Australia/VIC555/2020|EPI_ISL_426816|2020-03-25, length: 29900, identity: +/99.75%		Australia	VIC
16. hCoV-19/Australia/VIC779/2020|EPI_ISL_427054|2020-03-30, length: 29900, identity: +/99.74%		Australia	VIC
17. hCoV-19/Australia/VIC502/2020|EPI_ISL_426773|2020-03-22, length: 29897, identity: +/99.66%		Australia	VIC
counting	5	13
			13	VIC

## Sheet: cluster 6
Cluster 6, No. sequences: 17, Representative: hCoV-19/Australia/VIC985/2020|EPI_ISL_430554|2020-03-30, length:29903	overseas	australia	state
0. hCoV-19/Australia/VIC985/2020|EPI_ISL_430554|2020-03-30, length: 29903, identity: 100%		Australia	VIC
1. hCoV-19/Australia/VIC1024/2020|EPI_ISL_430531|2020-04-02, length: 29903, identity: +/99.72%		Australia	VIC
2. hCoV-19/Australia/VIC1045/2020|EPI_ISL_430546|2020-04-03, length: 29903, identity: +/99.95%		Australia	VIC
3. hCoV-19/Australia/VIC1164/2020|EPI_ISL_430624|2020-04-09, length: 29903, identity: +/99.63%		Australia	VIC
4. hCoV-19/Australia/VIC63/2020|EPI_ISL_419775|2020-03-13, length: 29899, identity: +/99.71%		Australia	VIC
5. hCoV-19/Australia/VIC164/2020|EPI_ISL_419861|2020-03-18, length: 29894, identity: +/99.61%		Australia	VIC
6. hCoV-19/Australia/VIC386/2020|EPI_ISL_426693|2020-03-23, length: 29892, identity: +/99.67%		Australia	VIC
7. hCoV-19/Australia/VIC116/2020|EPI_ISL_419721|2020-03-19, length: 29891, identity: +/99.51%		Australia	VIC
8. hCoV-19/Australia/VIC24/2020|EPI_ISL_419739|2020-03-09, length: 29873, identity: +/99.71%		Australia	VIC
9. hCoV-19/Australia/VIC76/2020|EPI_ISL_419788|2020-03-14, length: 29873, identity: +/99.75%		Australia	VIC
10. hCoV-19/Australia/VIC177/2020|EPI_ISL_419874|2020-03-18, length: 29873, identity: +/99.67%		Australia	VIC
11. hCoV-19/Australia/VIC119/2020|EPI_ISL_419726|2020-03-19, length: 29866, identity: +/99.81%		Australia	VIC
12. hCoV-19/Australia/VIC02/2020|EPI_ISL_416410|2020-01-24, length: 29865, identity: +/99.58%		Australia	VIC
13. hCoV-19/Australia/VIC19/2020|EPI_ISL_419738|2020-03-08, length: 29865, identity: +/99.57%		Australia	VIC
14. hCoV-19/Australia/VIC118/2020|EPI_ISL_419719|2020-03-20, length: 29865, identity: +/99.76%		Australia	VIC
15. hCoV-19/Australia/VIC358/2020|EPI_ISL_426666|2020-03-21, length: 29865, identity: +/99.77%		Australia	VIC
16. hCoV-19/Australia/VIC09/2020|EPI_ISL_416515|2020-03-15, length: 29852, identity: +/99.65%		Australia	VIC

## Sheet: cluster 7-34
Cluster 7, No. sequences: 8, Representative: hCoV-19/Australia/VIC986/2020|EPI_ISL_430557|2020-03-30, length:29903	overseas	australia	state
0. hCoV-19/Australia/VIC986/2020|EPI_ISL_430557|2020-03-30, length: 29903, identity: 100%		Australia	VIC
1. hCoV-19/Australia/VIC1079/2020|EPI_ISL_430565|2020-04-06, length: 29903, identity: +/99.84%		Australia	VIC
2. hCoV-19/Australia/VIC1175/2020|EPI_ISL_430625|2020-04-10, length: 29903, identity: +/99.53%		Australia	VIC
3. hCoV-19/Australia/VIC1187/2020|EPI_ISL_430675|2020-04-11, length: 29903, identity: +/99.64%		Australia	VIC
4. hCoV-19/Australia/VIC1209/2020|EPI_ISL_430499|2020-04-01, length: 29903, identity: +/99.58%		Australia	VIC
5. hCoV-19/Australia/VIC1234/2020|EPI_ISL_430511|2020-04-02, length: 29903, identity: +/99.86%		Australia	VIC
6. hCoV-19/Australia/VIC1237/2020|EPI_ISL_430525|2020-04-02, length: 29903, identity: +/99.83%		Australia	VIC
7. hCoV-19/Australia/VIC1057/2020|EPI_ISL_430668|2020-04-03, length: 29901, identity: +/99.63%		Australia	VIC
Cluster 8, No. sequences: 8, Representative: hCoV-19/Australia/VIC588/2020|EPI_ISL_426845|2020-03-21, length:29904	overseas	australia	state
0. hCoV-19/Australia/VIC588/2020|EPI_ISL_426845|2020-03-21, length: 29904, identity: 100%		Australia	VIC
1. hCoV-19/Australia/VIC560/2020|EPI_ISL_426821|2020-03-25, length: 29903, identity: +/99.58%		Australia	VIC
2. hCoV-19/Australia/VIC873/2020|EPI_ISL_427128|2020-04-05, length: 29903, identity: +/99.54%		Australia	VIC
3. hCoV-19/Australia/VIC887/2020|EPI_ISL_427140|2020-04-06, length: 29903, identity: +/99.60%		Australia	VIC
4. hCoV-19/Australia/VIC1301/2020|EPI_ISL_430679|2020-04-10, length: 29903, identity: +/99.73%		Australia	VIC
5. hCoV-19/Australia/VIC1302/2020|EPI_ISL_430680|2020-04-10, length: 29903, identity: +/99.63%		Australia	VIC
6. hCoV-19/Australia/VIC1342/2020|EPI_ISL_430683|2020-04-14, length: 29903, identity: +/99.72%		Australia	VIC
7. hCoV-19/Australia/VIC899/2020|EPI_ISL_427149|2020-04-08, length: 29900, identity: +/99.64%		Australia	VIC
Cluster 9, No. sequences: 5, Representative: hCoV-19/Australia/VIC757/2020|EPI_ISL_427034|2020-03-31, length:29904	overseas	australia	state
0. hCoV-19/Australia/VIC757/2020|EPI_ISL_427034|2020-03-31, length: 29904, identity: 100%		Australia	VIC
1. hCoV-19/Australia/VIC409/2020|EPI_ISL_426711|2020-03-26, length: 29903, identity: +/99.68%		Australia	VIC
2. hCoV-19/Australia/VIC708/2020|EPI_ISL_426995|2020-03-29, length: 29903, identity: +/99.75%		Australia	VIC
3. hCoV-19/Australia/VIC850/2020|EPI_ISL_427110|2020-04-04, length: 29903, identity: +/99.67%		Australia	VIC
4. hCoV-19/Australia/VIC927/2020|EPI_ISL_427155|2020-03-30, length: 29903, identity: +/99.70%		Australia	VIC
Cluster 10, No. sequences: 5, Representative: hCoV-19/Australia/VIC621/2020|EPI_ISL_426925|2020-03-28, length:29903	overseas	australia	state
0. hCoV-19/Australia/VIC621/2020|EPI_ISL_426925|2020-03-28, length: 29903, identity: 100%		Australia	VIC
1. hCoV-19/Australia/VIC767/2020|EPI_ISL_427044|2020-03-20, length: 29903, identity: +/99.73%		Australia	VIC
2. hCoV-19/Australia/VIC771/2020|EPI_ISL_427047|2020-03-18, length: 29903, identity: +/99.66%		Australia	VIC
3. hCoV-19/Australia/VIC810/2020|EPI_ISL_427084|2020-04-01, length: 29903, identity: +/99.53%		Australia	VIC
4. hCoV-19/Australia/VIC1078/2020|EPI_ISL_430564|2020-04-06, length: 29903, identity: +/99.54%		Australia	VIC
Cluster 11, No. sequences: 5, Representative: hCoV-19/Australia/VIC1047/2020|EPI_ISL_430561|2020-04-03, length:29903	overseas	australia	state
0. hCoV-19/Australia/VIC1047/2020|EPI_ISL_430561|2020-04-03, length: 29903, identity: 100%		Australia	VIC
1. hCoV-19/Australia/VIC1048/2020|EPI_ISL_430562|2020-04-03, length: 29903, identity: +/99.50%		Australia	VIC
2. hCoV-19/Australia/VIC1089/2020|EPI_ISL_430673|2020-04-06, length: 29903, identity: +/99.50%		Australia	VIC
3. hCoV-19/Australia/VIC1247/2020|EPI_ISL_436113|2020-04-09, length: 29903, identity: +/99.59%		Australia	VIC
4. hCoV-19/Australia/VIC1267/2020|EPI_ISL_436126|2020-04-12, length: 29903, identity: +/99.73%		Australia	VIC
Cluster 12, No. sequences: 5, Representative: hCoV-19/Australia/VIC673/2020|EPI_ISL_426969|2020-03-26, length:29903	overseas	australia	state
0. hCoV-19/Australia/VIC673/2020|EPI_ISL_426969|2020-03-26, length: 29903, identity: 100%		Australia	VIC
1. hCoV-19/Australia/VIC689/2020|EPI_ISL_426982|2020-03-29, length: 29903, identity: +/99.55%		Australia	VIC
2. hCoV-19/Australia/VIC760/2020|EPI_ISL_427036|2020-03-29, length: 29903, identity: +/99.56%		Australia	VIC
3. hCoV-19/Australia/VIC804/2020|EPI_ISL_427078|2020-04-01, length: 29903, identity: +/99.53%		Australia	VIC
4. hCoV-19/Australia/VIC1220/2020|EPI_ISL_430517|2020-04-01, length: 29903, identity: +/99.62%		Australia	VIC
Cluster 13, No. sequences: 5, Representative: hCoV-19/Australia/VIC936/2020|EPI_ISL_430470|2020-03-25, length:29903	overseas	australia	state
0. hCoV-19/Australia/VIC936/2020|EPI_ISL_430470|2020-03-25, length: 29903, identity: 100%		Australia	VIC
1. hCoV-19/Australia/VIC949/2020|EPI_ISL_430641|2020-03-26, length: 29903, identity: +/99.83%		Australia	VIC
2. hCoV-19/Australia/VIC1032/2020|EPI_ISL_430665|2020-04-02, length: 29903, identity: +/99.89%		Australia	VIC
3. hCoV-19/Australia/VIC1218/2020|EPI_ISL_430515|2020-04-01, length: 29903, identity: +/99.91%		Australia	VIC
4. hCoV-19/Australia/VIC1354/2020|EPI_ISL_430717|2020-04-12, length: 29903, identity: +/99.74%		Australia	VIC
Cluster 14, No. sequences: 4, Representative: hCoV-19/Australia/VIC101/2020|EPI_ISL_419813|2020-03-16, length:29893	overseas	australia	state
0. hCoV-19/Australia/VIC101/2020|EPI_ISL_419813|2020-03-16, length: 29893, identity: 100%		Australia	VIC
1. hCoV-19/Australia/VIC61/2020|EPI_ISL_419773|2020-03-13, length: 29865, identity: +/99.59%		Australia	VIC
2. hCoV-19/Australia/VIC370/2020|EPI_ISL_426678|2020-03-22, length: 29863, identity: +/99.65%		Australia	VIC
3. hCoV-19/Australia/VIC374/2020|EPI_ISL_426681|2020-03-22, length: 29863, identity: +/99.69%		Australia	VIC
Cluster 15, No. sequences: 4, Representative: hCoV-19/Australia/VIC472/2020|EPI_ISL_426764|2020-03-26, length:29904	overseas	australia	state
0. hCoV-19/Australia/VIC472/2020|EPI_ISL_426764|2020-03-26, length: 29904, identity: 100%		Australia	VIC
1. hCoV-19/Australia/VIC491/2020|EPI_ISL_426922|2020-03-30, length: 29903, identity: +/99.65%		Australia	VIC
2. hCoV-19/Australia/VIC1340/2020|EPI_ISL_430686|2020-04-13, length: 29903, identity: +/99.57%		Australia	VIC
3. hCoV-19/Australia/VIC1345/2020|EPI_ISL_430708|2020-04-14, length: 29903, identity: +/99.60%		Australia	VIC
Cluster 16, No. sequences: 4, Representative: hCoV-19/Australia/VIC388/2020|EPI_ISL_426695|2020-03-23, length:29891	overseas	australia	state
0. hCoV-19/Australia/VIC388/2020|EPI_ISL_426695|2020-03-23, length: 29891, identity: 100%		Australia	VIC
1. hCoV-19/Australia/VIC122/2020|EPI_ISL_419724|2020-03-20, length: 29866, identity: +/99.81%		Australia	VIC
2. hCoV-19/Australia/VIC14/2020|EPI_ISL_419734|2020-02-02, length: 29865, identity: +/99.81%		Australia	VIC
3. hCoV-19/Australia/VIC11/2020|EPI_ISL_416517|2020-03-16, length: 29821, identity: +/99.82%		Australia	VIC
Cluster 17, No. sequences: 4, Representative: hCoV-19/Australia/NT18/2020|EPI_ISL_426635|2020-03-23, length:29903	overseas	australia	state
0. hCoV-19/Australia/NT18/2020|EPI_ISL_426635|2020-03-23, length: 29903, identity: 100%		Australia	NT
1. hCoV-19/Australia/VIC503/2020|EPI_ISL_426774|2020-03-23, length: 29903, identity: +/99.56%		Australia	VIC
2. hCoV-19/Australia/VIC506/2020|EPI_ISL_426777|2020-03-23, length: 29903, identity: +/99.62%		Australia	VIC
3. hCoV-19/Australia/VIC522/2020|EPI_ISL_426790|2020-03-23, length: 29903, identity: +/99.77%		Australia	VIC
Cluster 18, No. sequences: 4, Representative: hCoV-19/Australia/VIC511/2020|EPI_ISL_426781|2020-03-23, length:29903	overseas	australia	state
0. hCoV-19/Australia/VIC511/2020|EPI_ISL_426781|2020-03-23, length: 29903, identity: 100%		Australia	VIC
1. hCoV-19/Australia/VIC549/2020|EPI_ISL_426812|2020-03-23, length: 29903, identity: +/99.61%		Australia	VIC
2. hCoV-19/Australia/VIC570/2020|EPI_ISL_426830|2020-03-25, length: 29903, identity: +/99.54%		Australia	VIC
3. hCoV-19/Australia/VIC590/2020|EPI_ISL_426847|2020-03-22, length: 29903, identity: +/99.69%		Australia	VIC
Cluster 19, No. sequences: 3, Representative: hCoV-19/England/CAMB-84ACA/2020|EPI_ISL_440487|2020-03-09, length:29782	overseas	australia	state
0. hCoV-19/England/CAMB-84ACA/2020|EPI_ISL_440487|2020-03-09, length: 29782, identity: 100%	overseas
1. hCoV-19/DRC/376/2020|EPI_ISL_420851|2020-03-25, length: 29762, identity: +/99.57%	overseas
2. hCoV-19/DRC/73/2020|EPI_ISL_417941|2020-03-18, length: 29743, identity: +/99.62%	overseas
Cluster 20, No. sequences: 3, Representative: hCoV-19/Australia/VIC332/2020|EPI_ISL_426641|2020-03-18, length:29901	overseas	australia	state
0. hCoV-19/Australia/VIC332/2020|EPI_ISL_426641|2020-03-18, length: 29901, identity: 100%		Australia	VIC
1. hCoV-19/Australia/VIC397/2020|EPI_ISL_426700|2020-03-24, length: 29887, identity: +/99.66%		Australia	VIC
2. hCoV-19/Australia/VIC379/2020|EPI_ISL_426686|2020-03-22, length: 29865, identity: +/99.73%		Australia	VIC
Cluster 21, No. sequences: 3, Representative: hCoV-19/Australia/VIC442/2020|EPI_ISL_426739|2020-03-27, length:29903	overseas	australia	state
0. hCoV-19/Australia/VIC442/2020|EPI_ISL_426739|2020-03-27, length: 29903, identity: 100%		Australia	VIC
1. hCoV-19/Australia/VIC700/2020|EPI_ISL_426990|2020-03-27, length: 29903, identity: +/99.67%		Australia	VIC
2. hCoV-19/Australia/VIC852/2020|EPI_ISL_427112|2020-04-04, length: 29903, identity: +/99.68%		Australia	VIC
Cluster 22, No. sequences: 3, Representative: hCoV-19/Australia/VIC1314/2020|EPI_ISL_430681|2020-04-11, length:29903	overseas	australia	state
0. hCoV-19/Australia/VIC1314/2020|EPI_ISL_430681|2020-04-11, length: 29903, identity: 100%		Australia	VIC
1. hCoV-19/Australia/VIC1334/2020|EPI_ISL_430682|2020-04-13, length: 29903, identity: +/99.75%		Australia	VIC
2. hCoV-19/Australia/VIC1343/2020|EPI_ISL_430684|2020-04-14, length: 29903, identity: +/99.83%		Australia	VIC
Cluster 23, No. sequences: 2, Representative: hCoV-19/Australia/VIC592/2020|EPI_ISL_426849|2020-03-23, length:29903	overseas	australia	state
0. hCoV-19/Australia/VIC592/2020|EPI_ISL_426849|2020-03-23, length: 29903, identity: 100%		Australia	VIC
1. hCoV-19/Australia/VIC944/2020|EPI_ISL_430642|2020-03-26, length: 29896, identity: +/99.56%		Australia	VIC
Cluster 24, No. sequences: 2, Representative: hCoV-19/Australia/VIC1003/2020|EPI_ISL_430487|2020-03-31, length:29903	overseas	australia	state
0. hCoV-19/Australia/VIC1003/2020|EPI_ISL_430487|2020-03-31, length: 29903, identity: 100%		Australia	VIC
1. hCoV-19/Australia/VIC1260/2020|EPI_ISL_436123|2020-04-11, length: 29903, identity: +/99.51%		Australia	VIC
Cluster 25, No. sequences: 2, Representative: hCoV-19/Australia/VIC691/2020|EPI_ISL_426983|2020-03-27, length:29902	overseas	australia	state
0. hCoV-19/Australia/VIC691/2020|EPI_ISL_426983|2020-03-27, length: 29902, identity: 100%		Australia	VIC
1. hCoV-19/Australia/VIC424/2020|EPI_ISL_426724|2020-03-25, length: 29894, identity: +/99.57%		Australia	VIC
Cluster 26, No. sequences: 2, Representative: hCoV-19/Australia/VIC956/2020|EPI_ISL_430529|2020-03-27, length:29903	overseas	australia	state
0. hCoV-19/Australia/VIC956/2020|EPI_ISL_430529|2020-03-27, length: 29903, identity: 100%		Australia	VIC
1. hCoV-19/Australia/VIC1038/2020|EPI_ISL_430534|2020-04-03, length: 29903, identity: +/99.66%		Australia	VIC
Cluster 27, No. sequences: 2, Representative: hCoV-19/Australia/VIC559/2020|EPI_ISL_426820|2020-03-24, length:29903	overseas	australia	state
0. hCoV-19/Australia/VIC559/2020|EPI_ISL_426820|2020-03-24, length: 29903, identity: 100%		Australia	VIC
1. hCoV-19/Australia/VIC1044/2020|EPI_ISL_430540|2020-04-03, length: 29903, identity: +/99.53%		Australia	VIC
Cluster 28, No. sequences: 2, Representative: hCoV-19/Australia/VIC1055/2020|EPI_ISL_430667|2020-04-03, length:29903	overseas	australia	state
0. hCoV-19/Australia/VIC1055/2020|EPI_ISL_430667|2020-04-03, length: 29903, identity: 100%		Australia	VIC
1. hCoV-19/Australia/VIC1106/2020|EPI_ISL_430588|2020-04-07, length: 29903, identity: +/99.60%		Australia	VIC
Cluster 29, No. sequences: 2, Representative: hCoV-19/Australia/VIC1321/2020|EPI_ISL_430704|2020-04-11, length:29903	overseas	australia	state
0. hCoV-19/Australia/VIC1321/2020|EPI_ISL_430704|2020-04-11, length: 29903, identity: 100%		Australia	VIC
1. hCoV-19/Australia/VIC569/2020|EPI_ISL_426829|2020-03-25, length: 29900, identity: +/99.66%		Australia	VIC
Cluster 30, No. sequences: 2, Representative: hCoV-19/Australia/VIC790/2020|EPI_ISL_427065|2020-03-31, length:29903	overseas	australia	state
0. hCoV-19/Australia/VIC790/2020|EPI_ISL_427065|2020-03-31, length: 29903, identity: 100%		Australia	VIC
1. hCoV-19/Australia/VIC1281/2020|EPI_ISL_430676|2020-04-08, length: 29903, identity: +/99.71%		Australia	VIC
Cluster 31, No. sequences: 2, Representative: hCoV-19/Australia/VIC693/2020|EPI_ISL_426985|2020-03-27, length:29903	overseas	australia	state
0. hCoV-19/Australia/VIC693/2020|EPI_ISL_426985|2020-03-27, length: 29903, identity: 100%		Australia	VIC
1. hCoV-19/Australia/VIC1012/2020|EPI_ISL_430548|2020-04-01, length: 29903, identity: +/99.65%		Australia	VIC
Cluster 32, No. sequences: 2, Representative: hCoV-19/Australia/VIC578/2020|EPI_ISL_426836|2020-03-26, length:29903	overseas	australia	state
0. hCoV-19/Australia/VIC578/2020|EPI_ISL_426836|2020-03-26, length: 29903, identity: 100%		Australia	VIC
1. hCoV-19/Australia/VIC1145/2020|EPI_ISL_430620|2020-04-08, length: 29903, identity: +/99.50%		Australia	VIC
Cluster 33, No. sequences: 2, Representative: hCoV-19/Australia/VIC633/2020|EPI_ISL_426875|2020-03-27, length:29903	overseas	australia	state
0. hCoV-19/Australia/VIC633/2020|EPI_ISL_426875|2020-03-27, length: 29903, identity: 100%		Australia	VIC
1. hCoV-19/Australia/VIC670/2020|EPI_ISL_426966|2020-03-27, length: 29903, identity: +/99.62%		Australia	VIC
Cluster 34, No. sequences: 2, Representative: hCoV-19/Australia/NT28/2020|EPI_ISL_430631|2020, length:29903	overseas	australia	state
0. hCoV-19/Australia/NT28/2020|EPI_ISL_430631|2020, length: 29903, identity: 100%		Australia	NT
1. hCoV-19/Australia/VIC1017/2020|EPI_ISL_430489|2020-04-01, length: 29903, identity: +/99.70%		Australia	VIC

## Sheet: other clusters
clusters	cluster size (how many seq, including representative seq)	overseas	from Australia	NSW	VIC	NT	QLD	WA
Cluster 35, No. sequences: 1, Representative: hCoV-19/Australia/VIC695/2020|EPI_ISL_426987|2020-03-28, length:29903	1		1	0	1	0	0	0
Cluster 36, No. sequences: 1, Representative: hCoV-19/Australia/VIC609/2020|EPI_ISL_426863|2020-03-27, length:29903	1		1	0	1	0	0	0
Cluster 37, No. sequences: 1, Representative: hCoV-19/Australia/VIC-CBA5/2020|EPI_ISL_430065|2020-04-08, length:29875	1		1	0	1	0	0	0
Cluster 38, No. sequences: 1, Representative: hCoV-19/Australia/VIC624/2020|EPI_ISL_426928|2020-03-28, length:29903	1		1	0	1	0	0	0
Cluster 39, No. sequences: 1, Representative: hCoV-19/Australia/VIC711/2020|EPI_ISL_426998|2020-03-29, length:29903	1		1	0	1	0	0	0
Cluster 40, No. sequences: 1, Representative: hCoV-19/Australia/VIC1064/2020|EPI_ISL_430672|2020-04-04, length:29903	1		1	0	1	0	0	0
Cluster 41, No. sequences: 1, Representative: hCoV-19/Australia/VIC10/2020|EPI_ISL_416516|2020-03-16, length:29874	1		1	0	1	0	0	0
Cluster 42, No. sequences: 1, Representative: hCoV-19/Australia/VIC955/2020|EPI_ISL_430643|2020-03-26, length:29903	1		1	0	1	0	0	0
Cluster 43, No. sequences: 1, Representative: hCoV-19/Australia/NT04/2020|EPI_ISL_419833|2020-02-22, length:29865	1		1	0	0	1	0	0
Cluster 44, No. sequences: 1, Representative: hCoV-19/Australia/VIC643/2020|EPI_ISL_426939|2020-03-28, length:29903	1		1	0	1	0	0	0
Cluster 45, No. sequences: 1, Representative: hCoV-19/Australia/VIC545/2020|EPI_ISL_426808|2020-03-24, length:29903	1		1	0	1	0	0	0
Cluster 46, No. sequences: 1, Representative: hCoV-19/Australia/VIC1108/2020|EPI_ISL_430591|2020-04-07, length:29903	1		1	0	1	0	0	0
Cluster 47, No. sequences: 1, Representative: hCoV-19/Australia/VIC801/2020|EPI_ISL_427075|2020-04-01, length:29903	1		1	0	1	0	0	0
Cluster 48, No. sequences: 1, Representative: hCoV-19/Australia/VIC466/2020|EPI_ISL_426759|2020-03-27, length:29903	1		1	0	1	0	0	0
Cluster 49, No. sequences: 1, Representative: hCoV-19/Australia/VIC557/2020|EPI_ISL_426818|2020-03-25, length:29903	1		1	0	1	0	0	0
Cluster 50, No. sequences: 1, Representative: hCoV-19/Australia/VIC452/2020|EPI_ISL_426748|2020-03-25, length:29903	1		1	0	1	0	0	0
Cluster 51, No. sequences: 1, Representative: hCoV-19/Australia/VIC1174/2020|EPI_ISL_430623|2020-04-10, length:29903	1		1	0	1	0	0	0
Cluster 52, No. sequences: 1, Representative: hCoV-19/Australia/VIC928/2020|EPI_ISL_427156|2020-03-30, length:29903	1		1	0	1	0	0	0
Cluster 53, No. sequences: 1, Representative: hCoV-19/Australia/VIC671/2020|EPI_ISL_426967|2020-03-27, length:29765	1		1	0	1	0	0	0
Cluster 54, No. sequences: 1, Representative: hCoV-19/Australia/VIC1250/2020|EPI_ISL_436115|2020-04-10, length:29903	1		1	0	1	0	0	0
Cluster 55, No. sequences: 1, Representative: hCoV-19/Australia/VIC814/2020|EPI_ISL_427087|2020-04-02, length:29903	1		1	0	1	0	0	0
Cluster 56, No. sequences: 1, Representative: hCoV-19/Australia/VIC730/2020|EPI_ISL_427009|2020-03-30, length:29903	1		1	0	1	0	0	0
Cluster 57, No. sequences: 1, Representative: hCoV-19/Australia/VIC654/2020|EPI_ISL_426950|2020-03-28, length:29903	1		1	0	1	0	0	0
Cluster 58, No. sequences: 1, Representative: hCoV-19/Australia/VIC121/2020|EPI_ISL_419723|2020-03-18, length:29887	1		1	0	1	0	0	0
Cluster 59, No. sequences: 1, Representative: hCoV-19/Australia/VIC996/2020|EPI_ISL_430480|2020-03-31, length:29903	1		1	0	1	0	0	0
Cluster 60, No. sequences: 1, Representative: hCoV-19/Australia/VIC422/2020|EPI_ISL_426722|2020-03-25, length:29903	1		1	0	1	0	0	0
Cluster 61, No. sequences: 1, Representative: hCoV-19/Australia/VIC885/2020|EPI_ISL_427138|2020-04-06, length:29903	1		1	0	1	0	0	0
Cluster 62, No. sequences: 1, Representative: hCoV-19/Finland/13M3/2020|EPI_ISL_418389|2020-03-13, length:29811	1	1	0	0	0	0	0	0
Cluster 63, No. sequences: 1, Representative: hCoV-19/Australia/VIC809/2020|EPI_ISL_427083|2020-03-28, length:29903	1		1	0	1	0	0	0
Cluster 64, No. sequences: 1, Representative: hCoV-19/Australia/VIC692/2020|EPI_ISL_426984|2020-03-27, length:29901	1		1	0	1	0	0	0
Cluster 65, No. sequences: 1, Representative: hCoV-19/Australia/VIC864/2020|EPI_ISL_427121|2020-04-05, length:29903	1		1	0	1	0	0	0
Cluster 66, No. sequences: 1, Representative: hCoV-19/Australia/VIC93/2020|EPI_ISL_419815|2020-03-15, length:29873	1		1	0	1	0	0	0
Cluster 67, No. sequences: 1, Representative: hCoV-19/Australia/VIC1221/2020|EPI_ISL_430518|2020-04-01, length:29903	1		1	0	1	0	0	0
Cluster 68, No. sequences: 1, Representative: hCoV-19/Australia/VIC360/2020|EPI_ISL_426668|2020-03-22, length:29887	1		1	0	1	0	0	0
Cluster 69, No. sequences: 1, Representative: hCoV-19/Australia/VIC1061/2020|EPI_ISL_430549|2020-04-04, length:29903	1		1	0	1	0	0	0
Cluster 70, No. sequences: 1, Representative: hCoV-19/Australia/VIC1136/2020|EPI_ISL_430606|2020-04-08, length:29903	1		1	0	1	0	0	0
Cluster 71, No. sequences: 1, Representative: hCoV-19/Australia/VIC-CBA6/2020|EPI_ISL_430066|2020-04-08, length:29875	1		1	0	1	0	0	0
Cluster 72, No. sequences: 1, Representative: hCoV-19/Australia/VIC470/2020|EPI_ISL_426762|2020-03-26, length:29903	1		1	0	1	0	0	0
Cluster 73, No. sequences: 1, Representative: hCoV-19/Australia/VIC12/2020|EPI_ISL_416518|2020-03-16, length:29872	1		1	0	1	0	0	0
Cluster 74, No. sequences: 1, Representative: hCoV-19/Australia/VIC818/2020|EPI_ISL_427090|2020-04-03, length:29894	1		1	0	1	0	0	0
Cluster 75, No. sequences: 1, Representative: hCoV-19/Australia/VIC528/2020|EPI_ISL_426794|2020-03-24, length:29903	1		1	0	1	0	0	0
Cluster 76, No. sequences: 1, Representative: hCoV-19/Australia/VIC1317/2020|EPI_ISL_430691|2020-04-11, length:29903	1		1	0	1	0	0	0
Cluster 77, No. sequences: 1, Representative: hCoV-19/Australia/VIC1276/2020|EPI_ISL_430685|2020-04-04, length:29903	1		1	0	1	0	0	0
Cluster 78, No. sequences: 1, Representative: hCoV-19/Australia/VIC1014/2020|EPI_ISL_430555|2020-04-01, length:29903	1		1	0	1	0	0	0
Cluster 79, No. sequences: 1, Representative: hCoV-19/Netherlands/Dalen_1363624/2020|EPI_ISL_413568|2020-03-01, length:29783	1	1	0	0	0	0	0	0
Cluster 80, No. sequences: 1, Representative: hCoV-19/Australia/VIC1005/2020|EPI_ISL_430491|2020-03-31, length:29903	1		1	0	1	0	0	0
Cluster 81, No. sequences: 1, Representative: hCoV-19/Australia/VIC854/2020|EPI_ISL_427114|2020-04-04, length:29894	1		1	0	1	0	0	0
Cluster 82, No. sequences: 1, Representative: hCoV-19/Australia/VIC960/2020|EPI_ISL_430648|2020-03-27, length:29903	1		1	0	1	0	0	0
Cluster 83, No. sequences: 1, Representative: hCoV-19/Australia/VIC1186/2020|EPI_ISL_430629|2020-04-11, length:29903	1		1	0	1	0	0	0
Cluster 84, No. sequences: 1, Representative: hCoV-19/Australia/VIC1004/2020|EPI_ISL_430488|2020-03-31, length:29903	1		1	0	1	0	0	0
Cluster 85, No. sequences: 1, Representative: hCoV-19/Australia/VIC448/2020|EPI_ISL_426744|2020-03-24, length:29903	1		1	0	1	0	0	0
Cluster 86, No. sequences: 1, Representative: hCoV-19/Australia/VIC872/2020|EPI_ISL_427127|2020-04-05, length:29900	1		1	0	1	0	0	0
Cluster 87, No. sequences: 1, Representative: hCoV-19/Australia/VIC06/2020|EPI_ISL_416414|2020-03-06, length:29865	1		1	0	1	0	0	0
Cluster 88, No. sequences: 1, Representative: hCoV-19/Australia/VIC290/2020|EPI_ISL_419981|2020-03-22, length:29853	1		1	0	1	0	0	0
Cluster 89, No. sequences: 1, Representative: hCoV-19/Australia/VIC423/2020|EPI_ISL_426723|2020-03-25, length:29903	1		1	0	1	0	0	0
Cluster 90, No. sequences: 1, Representative: hCoV-19/Australia/VIC1303/2020|EPI_ISL_430694|2020-04-10, length:29903	1		1	0	1	0	0	0
Cluster 91, No. sequences: 1, Representative: hCoV-19/Australia/VIC107/2020|EPI_ISL_419720|2020-03-17, length:29865	1		1	0	1	0	0	0
Cluster 92, No. sequences: 1, Representative: hCoV-19/Australia/VIC363/2020|EPI_ISL_426671|2020-03-22, length:29901	1		1	0	1	0	0	0
Cluster 93, No. sequences: 1, Representative: hCoV-19/Brunei/1/2020|EPI_ISL_443187|2020-03-11, length:29859	1	1	0	0	0	0	0	0
Cluster 94, No. sequences: 1, Representative: hCoV-19/Australia/VIC967/2020|EPI_ISL_430660|2020-03-27, length:29903	1		1	0	1	0	0	0
Cluster 95, No. sequences: 1, Representative: hCoV-19/Australia/VIC453/2020|EPI_ISL_426749|2020-03-25, length:29903	1		1	0	1	0	0	0
Cluster 96, No. sequences: 1, Representative: hCoV-19/Australia/VIC684/2020|EPI_ISL_426979|2020-03-29, length:29903	1		1	0	1	0	0	0
Cluster 97, No. sequences: 1, Representative: hCoV-19/Australia/VIC789/2020|EPI_ISL_427064|2020-03-31, length:29903	1		1	0	1	0	0	0
Cluster 98, No. sequences: 1, Representative: hCoV-19/Australia/VIC776/2020|EPI_ISL_427051|2020-03-30, length:29903	1		1	0	1	0	0	0
Cluster 99, No. sequences: 1, Representative: hCoV-19/Australia/VIC601/2020|EPI_ISL_426857|2020-03-26, length:29902	1		1	0	1	0	0	0
Cluster 100, No. sequences: 1, Representative: hCoV-19/Australia/VIC352/2020|EPI_ISL_426660|2020-03-20, length:29846	1		1	0	1	0	0	0
Cluster 101, No. sequences: 1, Representative: hCoV-19/Australia/VIC992/2020|EPI_ISL_430475|2020-03-31, length:29906	1		1	0	1	0	0	0
Cluster 102, No. sequences: 1, Representative: hCoV-19/Australia/VIC1295/2020|EPI_ISL_430712|2020-04-09, length:29903	1		1	0	1	0	0	0
Cluster 103, No. sequences: 1, Representative: hCoV-19/Australia/VIC1176/2020|EPI_ISL_430630|2020-04-10, length:29903	1		1	0	1	0	0	0
Cluster 104, No. sequences: 1, Representative: hCoV-19/Australia/VIC1197/2020|EPI_ISL_430506|2020-03-31, length:29903	1		1	0	1	0	0	0
Cluster 105, No. sequences: 1, Representative: hCoV-19/Australia/VIC792/2020|EPI_ISL_427067|2020-03-31, length:29903	1		1	0	1	0	0	0
Cluster 106, No. sequences: 1, Representative: hCoV-19/Australia/VIC829/2020|EPI_ISL_427097|2020-04-04, length:29903	1		1	0	1	0	0	0
Cluster 107, No. sequences: 1, Representative: hCoV-19/Australia/VIC1163/2020|EPI_ISL_430617|2020-04-09, length:29906	1		1	0	1	0	0	0
Cluster 108, No. sequences: 1, Representative: hCoV-19/Australia/VIC1233/2020|EPI_ISL_430510|2020-04-02, length:29903	1		1	0	1	0	0	0
Cluster 109, No. sequences: 1, Representative: hCoV-19/Australia/VIC1219/2020|EPI_ISL_430516|2020-04-01, length:29903	1		1	0	1	0	0	0
Cluster 110, No. sequences: 1, Representative: hCoV-19/Australia/VIC1068/2020|EPI_ISL_430671|2020-04-04, length:29903	1		1	0	1	0	0	0
Cluster 111, No. sequences: 1, Representative: hCoV-19/Australia/VIC1335/2020|EPI_ISL_430692|2020-04-13, length:29903	1		1	0	1	0	0	0
Cluster 112, No. sequences: 1, Representative: hCoV-19/Australia/VIC987/2020|EPI_ISL_430558|2020-03-30, length:29882	1		1	0	1	0	0	0
Cluster 113, No. sequences: 1, Representative: hCoV-19/Australia/VIC1181/2020|EPI_ISL_430627|2020-04-11, length:29903	1		1	0	1	0	0	0
Cluster 114, No. sequences: 1, Representative: hCoV-19/Australia/VIC477/2020|EPI_ISL_426909|2020-03-28, length:29903	1		1	0	1	0	0	0
Cluster 115, No. sequences: 1, Representative: hCoV-19/Australia/VIC1257/2020|EPI_ISL_436121|2020-04-11, length:29903	1		1	0	1	0	0	0
Cluster 116, No. sequences: 1, Representative: hCoV-19/Australia/VIC1304/2020|EPI_ISL_430703|2020-04-10, length:29903	1		1	0	1	0	0	0
Cluster 117, No. sequences: 1, Representative: hCoV-19/Australia/VIC777/2020|EPI_ISL_427052|2020-03-30, length:29765	1		1	0	1	0	0	0
Cluster 118, No. sequences: 1, Representative: hCoV-19/Australia/VIC1142/2020|EPI_ISL_430613|2020-04-10, length:29903	1		1	0	1	0	0	0
Cluster 119, No. sequences: 1, Representative: hCoV-19/Australia/VIC721/2020|EPI_ISL_427004|2020-03-27, length:29904	1		1	0	1	0	0	0
Cluster 120, No. sequences: 1, Representative: hCoV-19/Australia/VIC641/2020|EPI_ISL_426937|2020-03-29, length:29903	1		1	0	1	0	0	0
Cluster 121, No. sequences: 1, Representative: hCoV-19/Australia/VIC604/2020|EPI_ISL_426859|2020-03-26, length:29903	1		1	0	1	0	0	0
